# Supplementary figures and images for: Predicting genetic and ecological characteristics of bacterial species by comparing the trajectories of d N /d S and d I /d S in bacterial genomes
Source: Royal Society of Chemistry journal article supplement (doi:10.1039/c3mb70476a), 2013-11-27

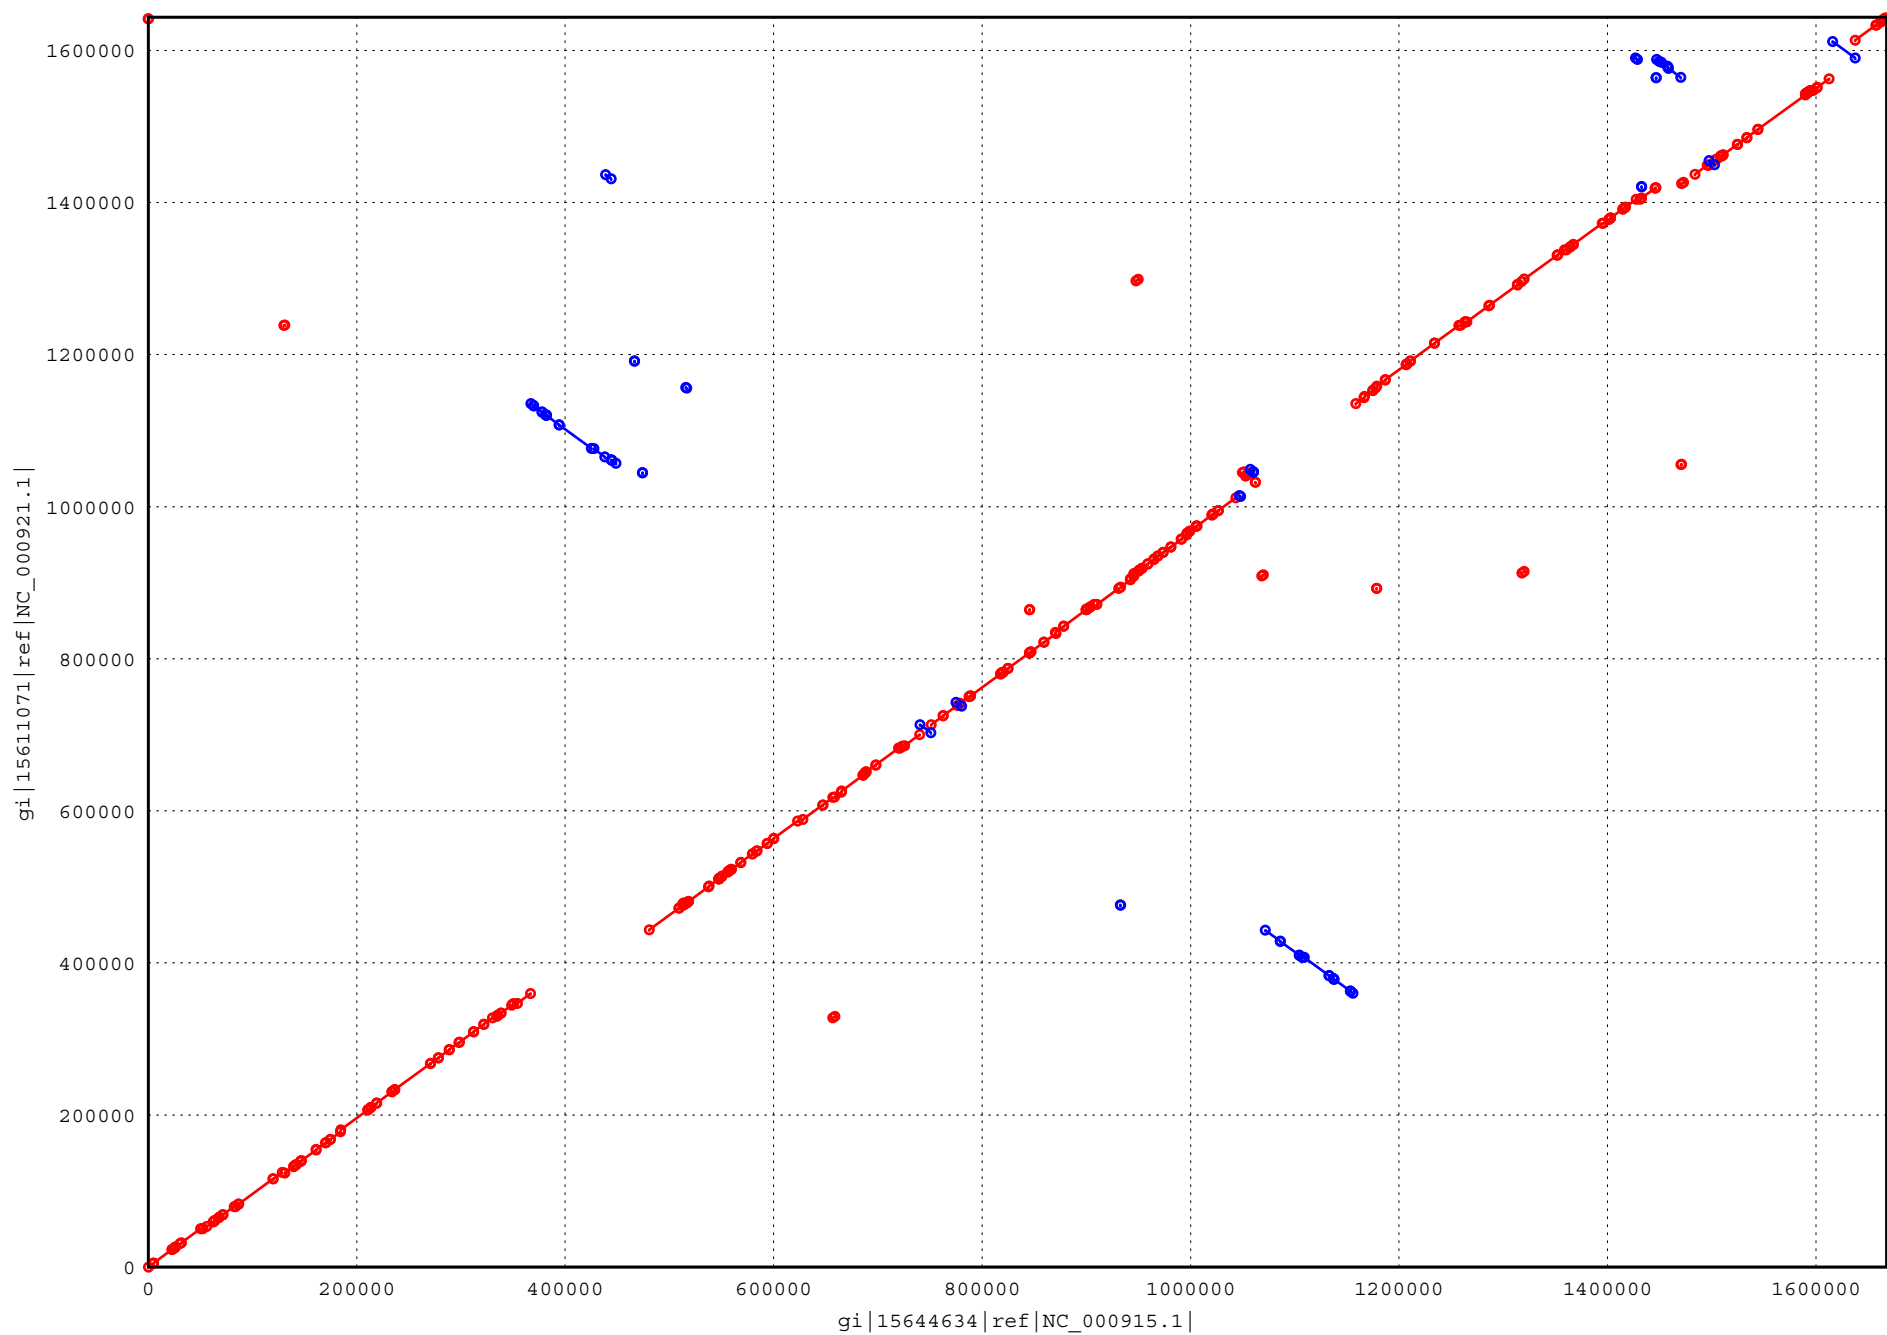

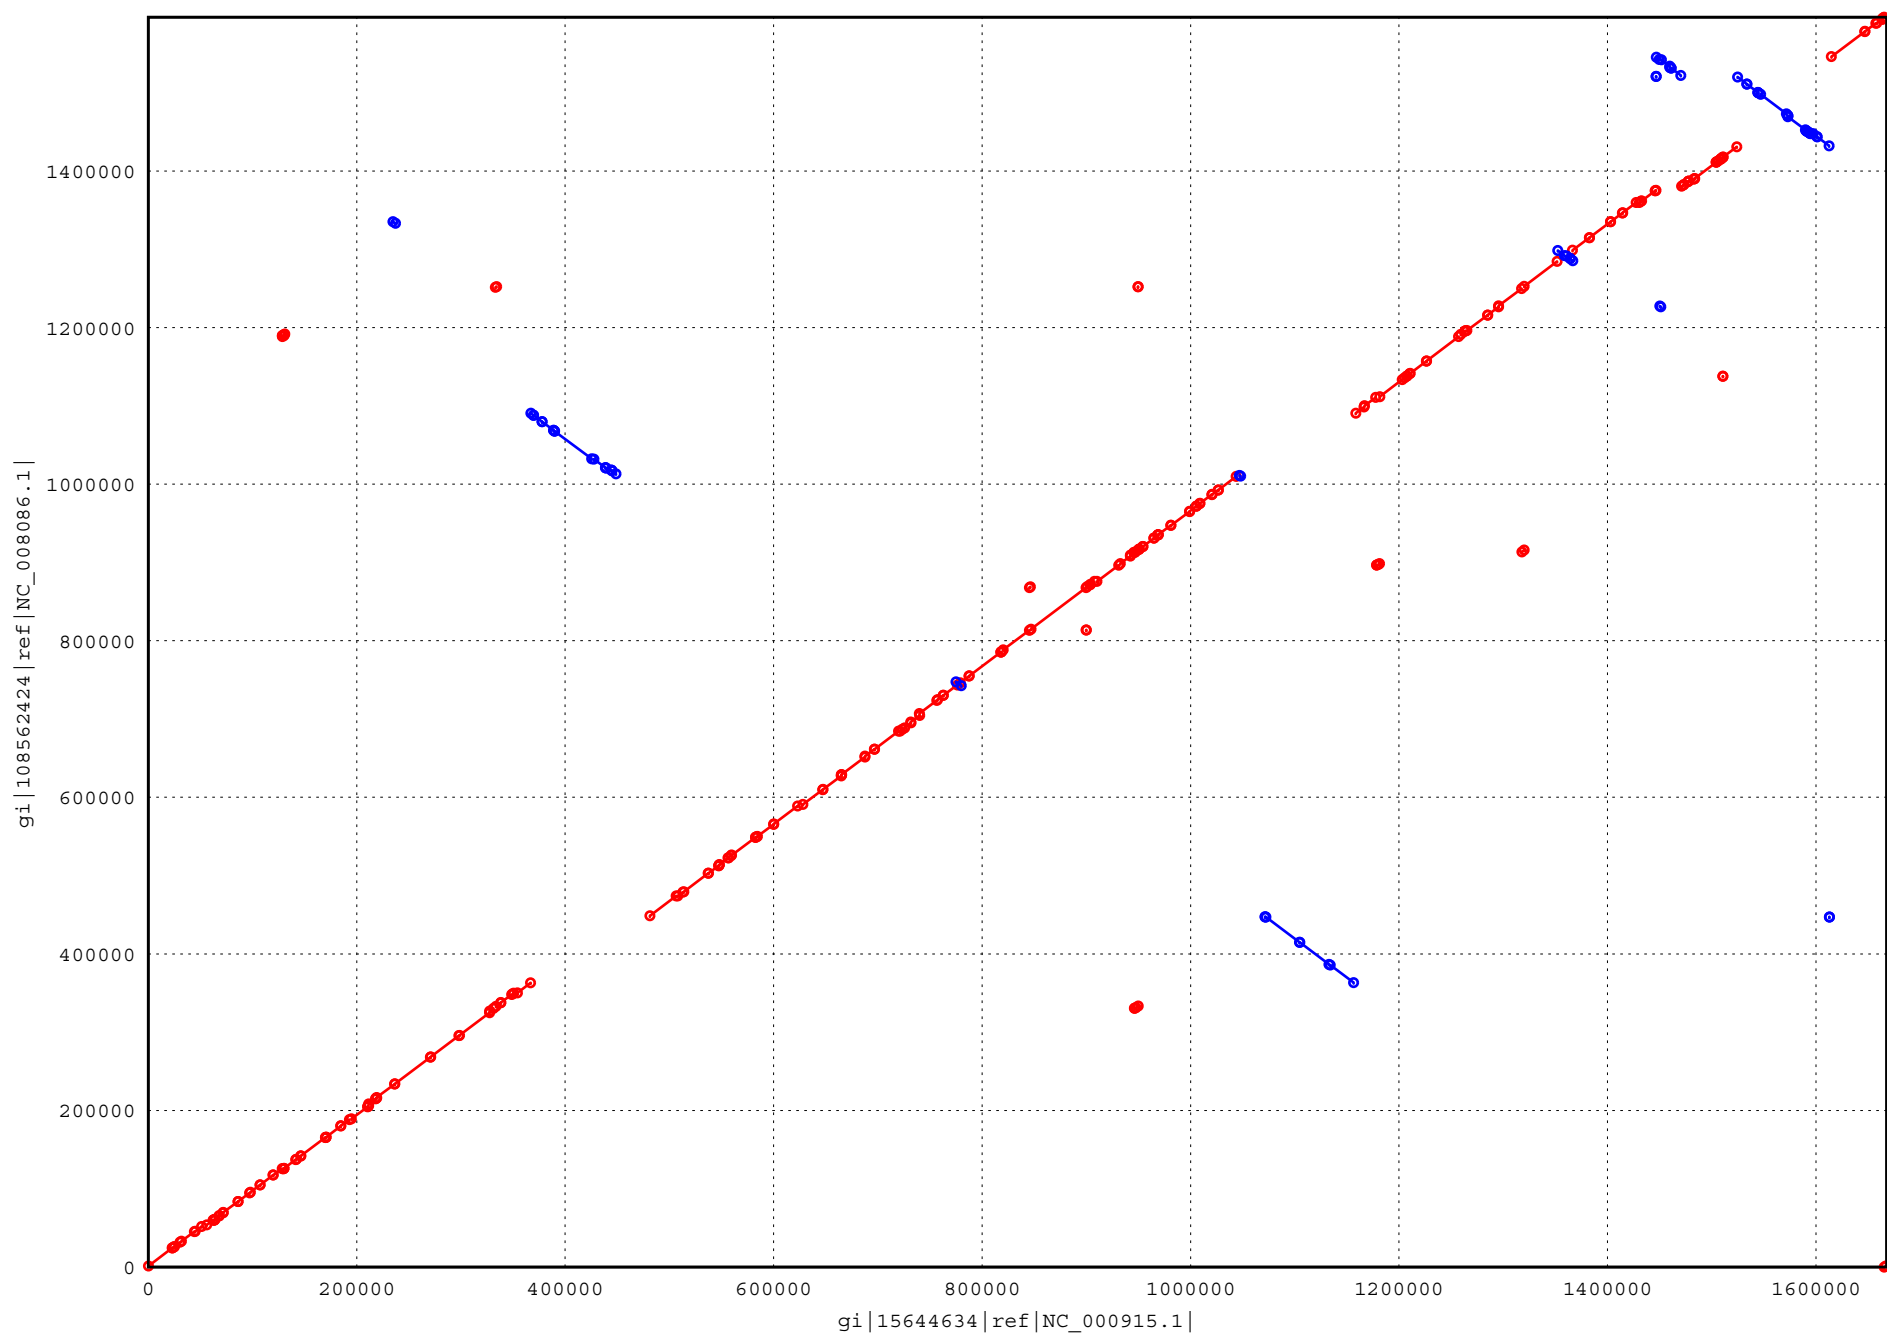



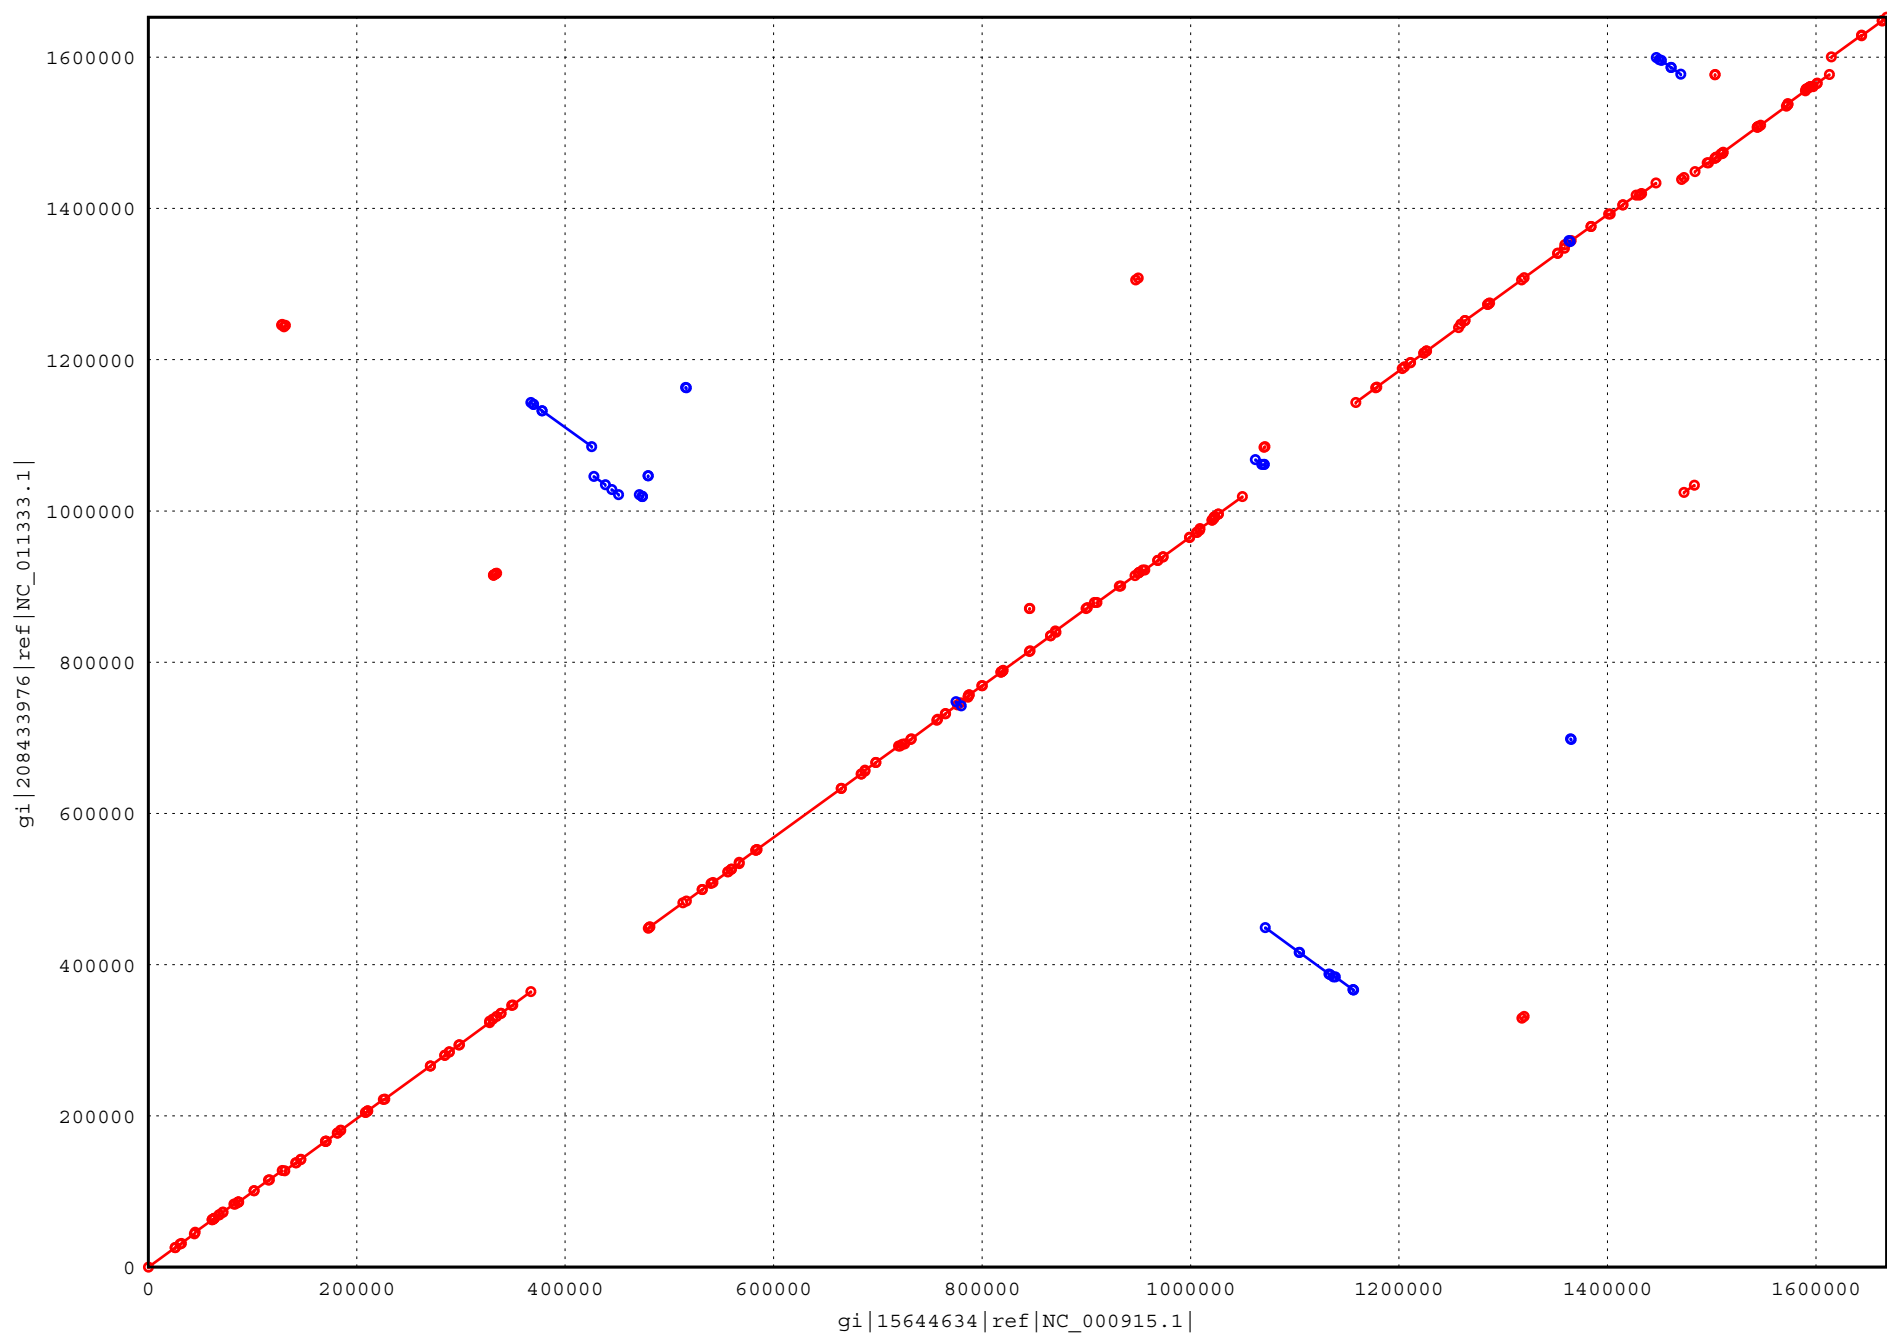

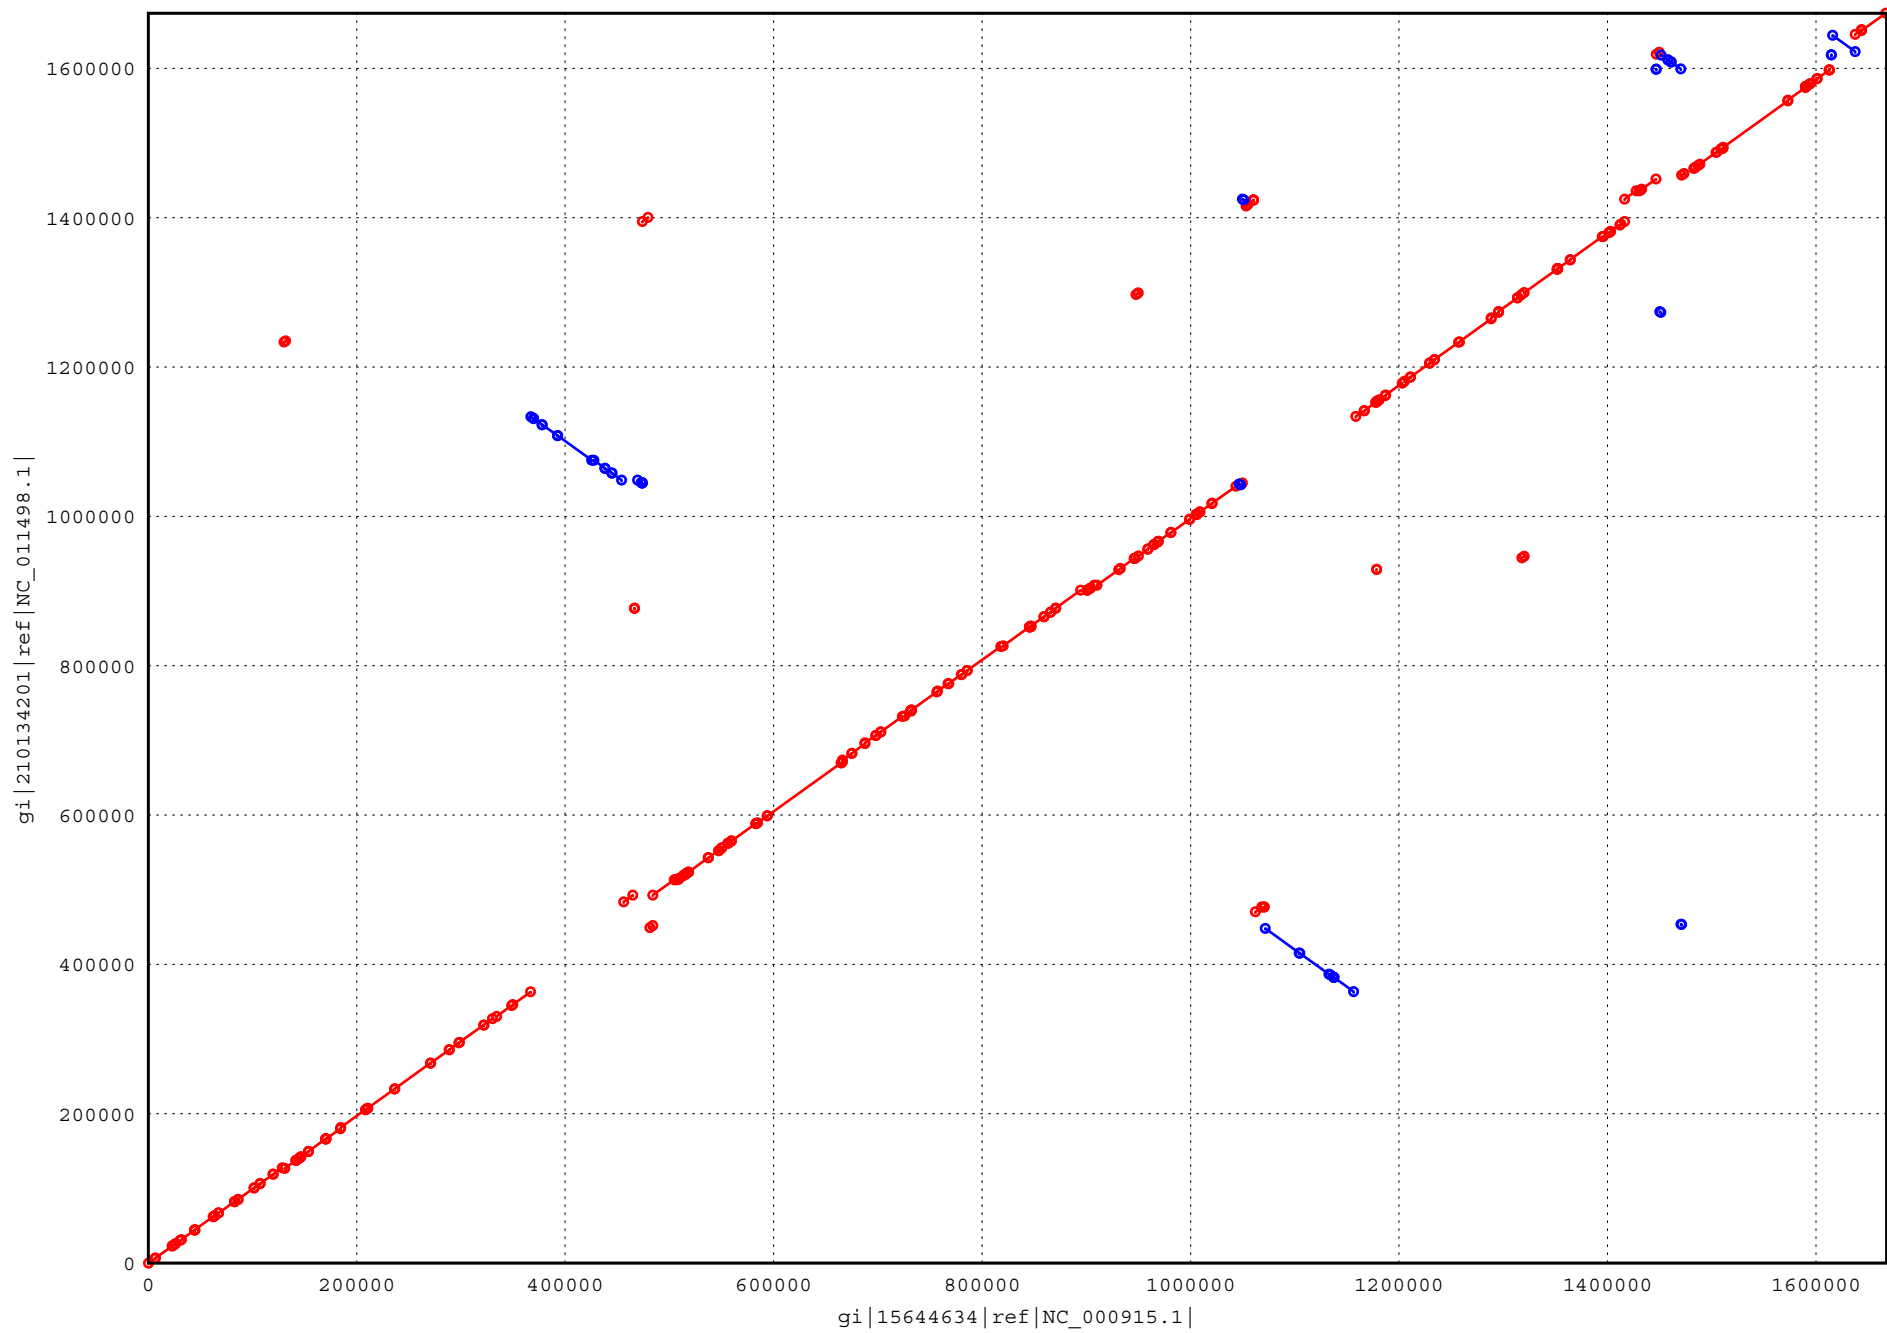

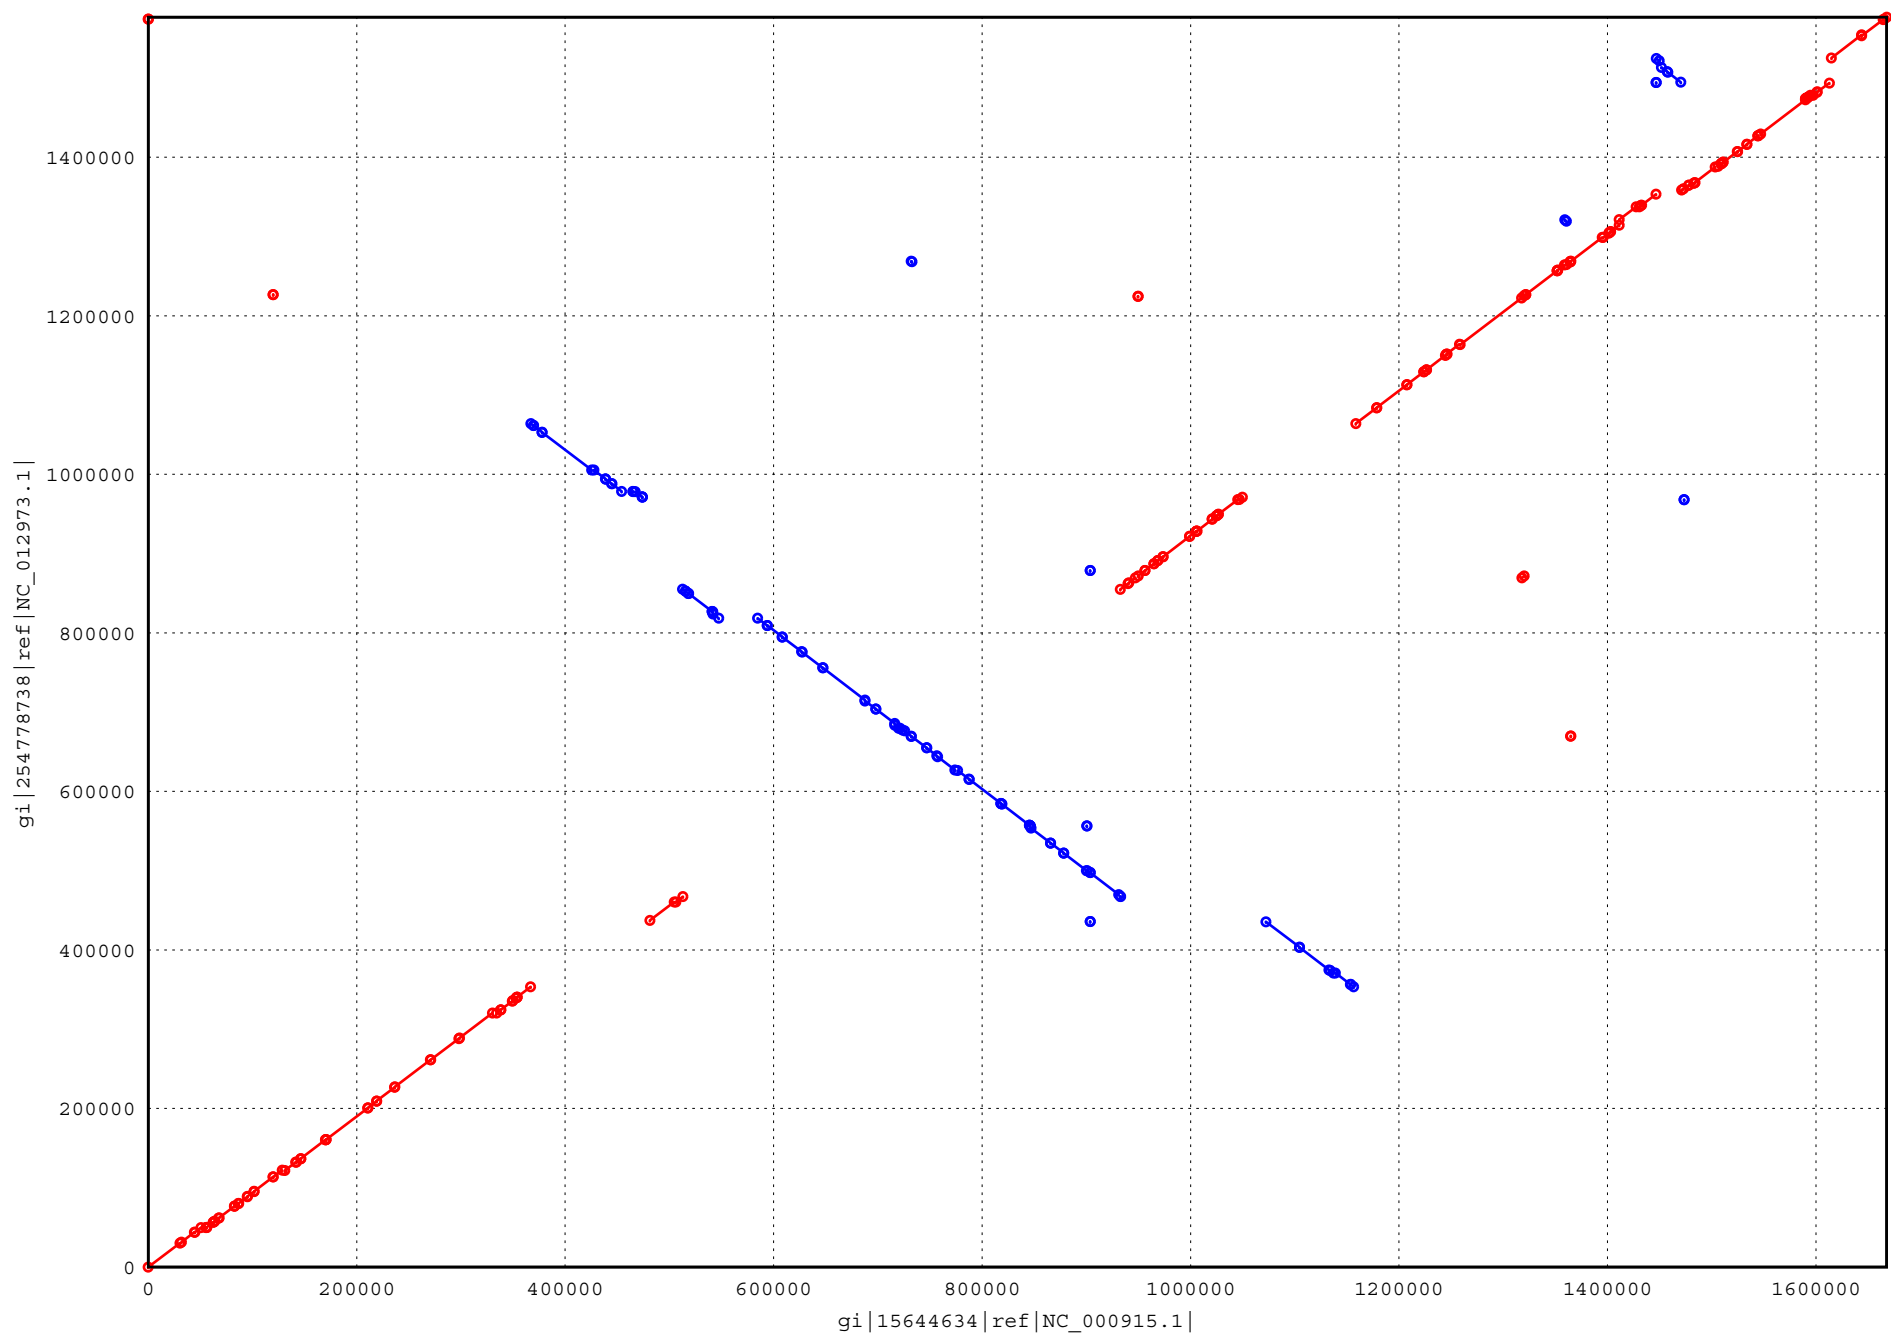

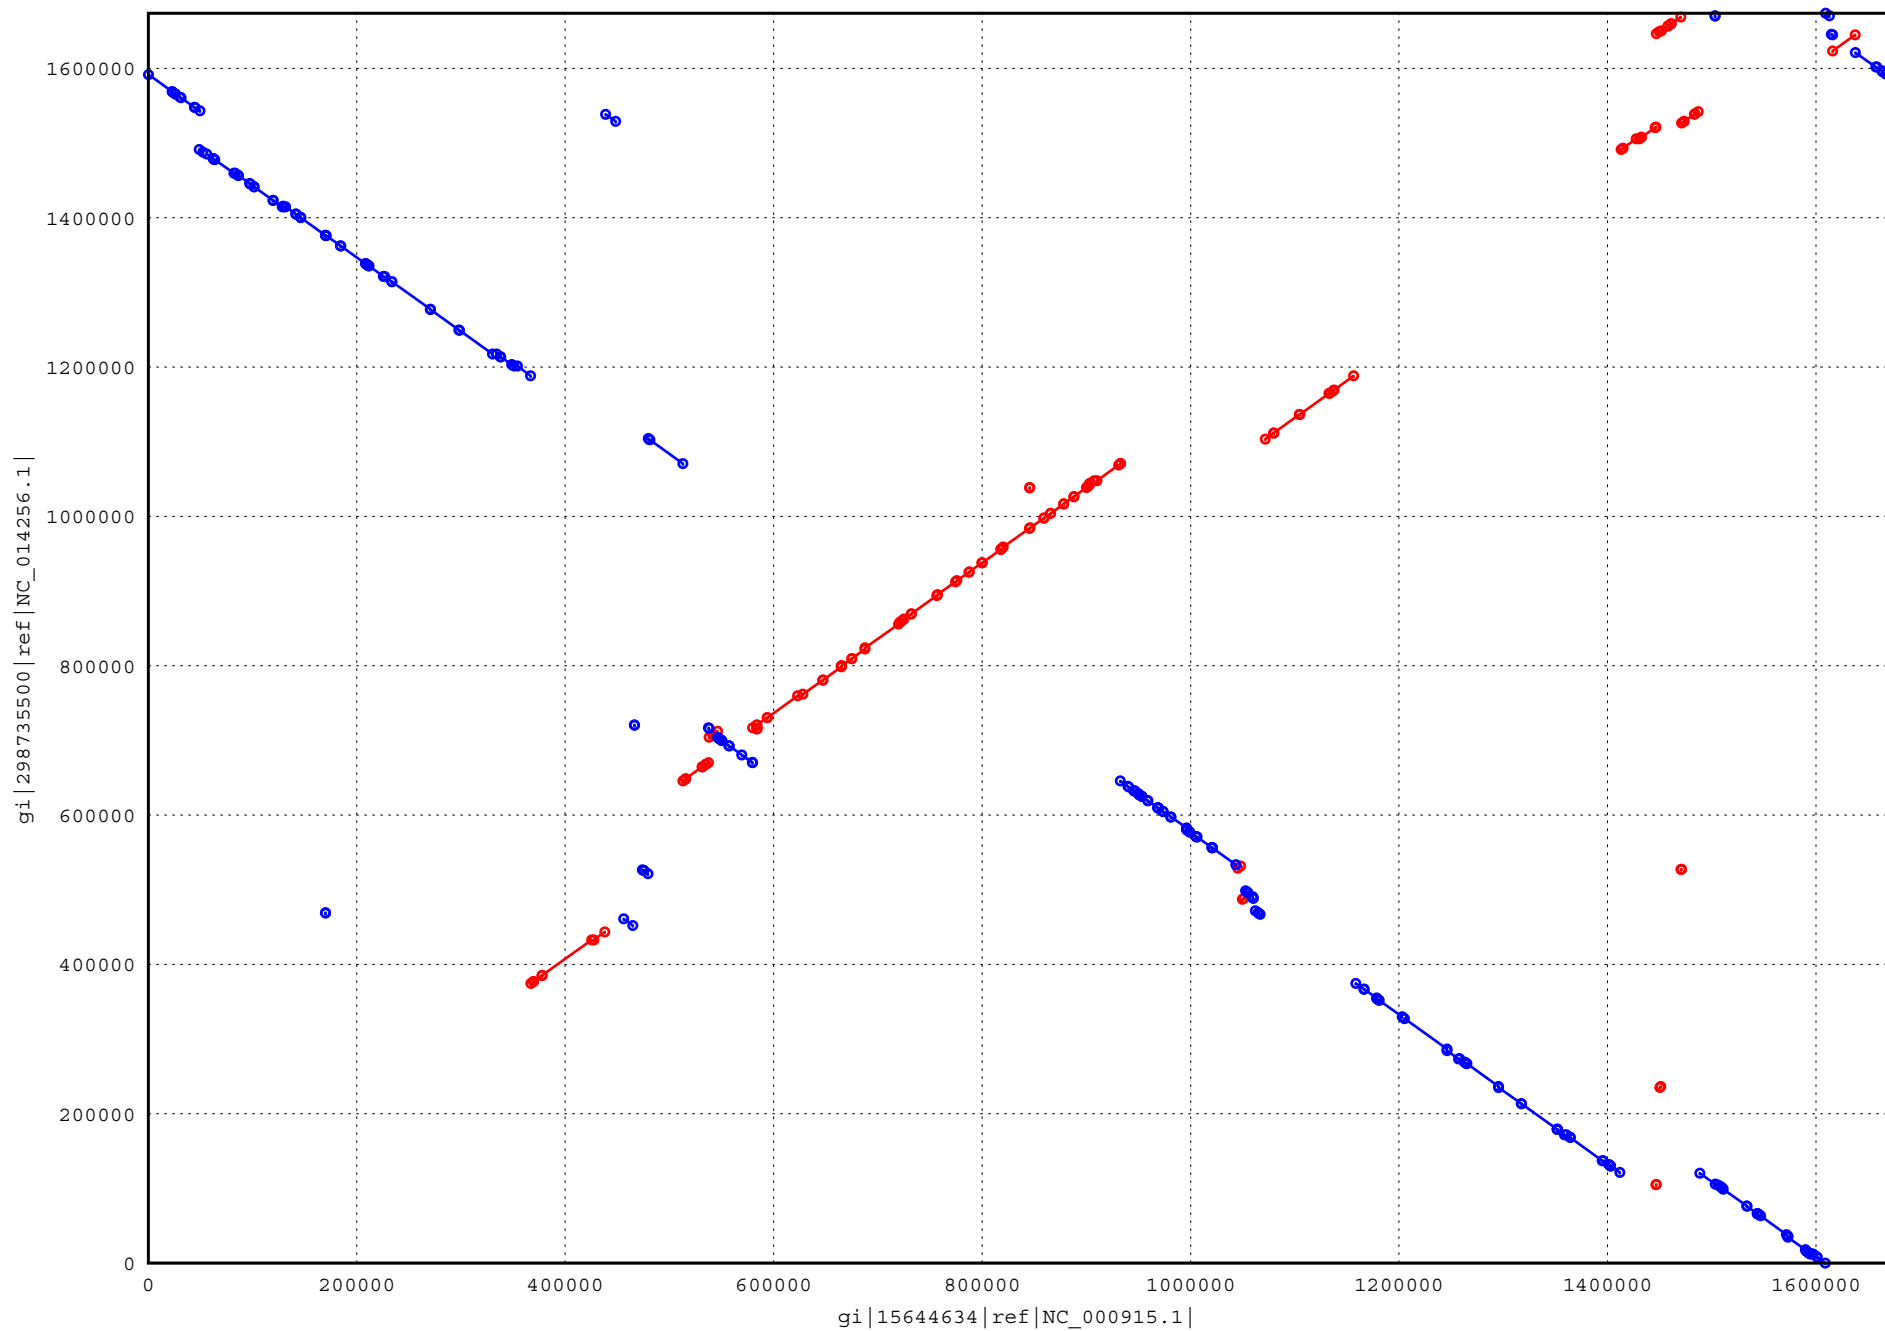

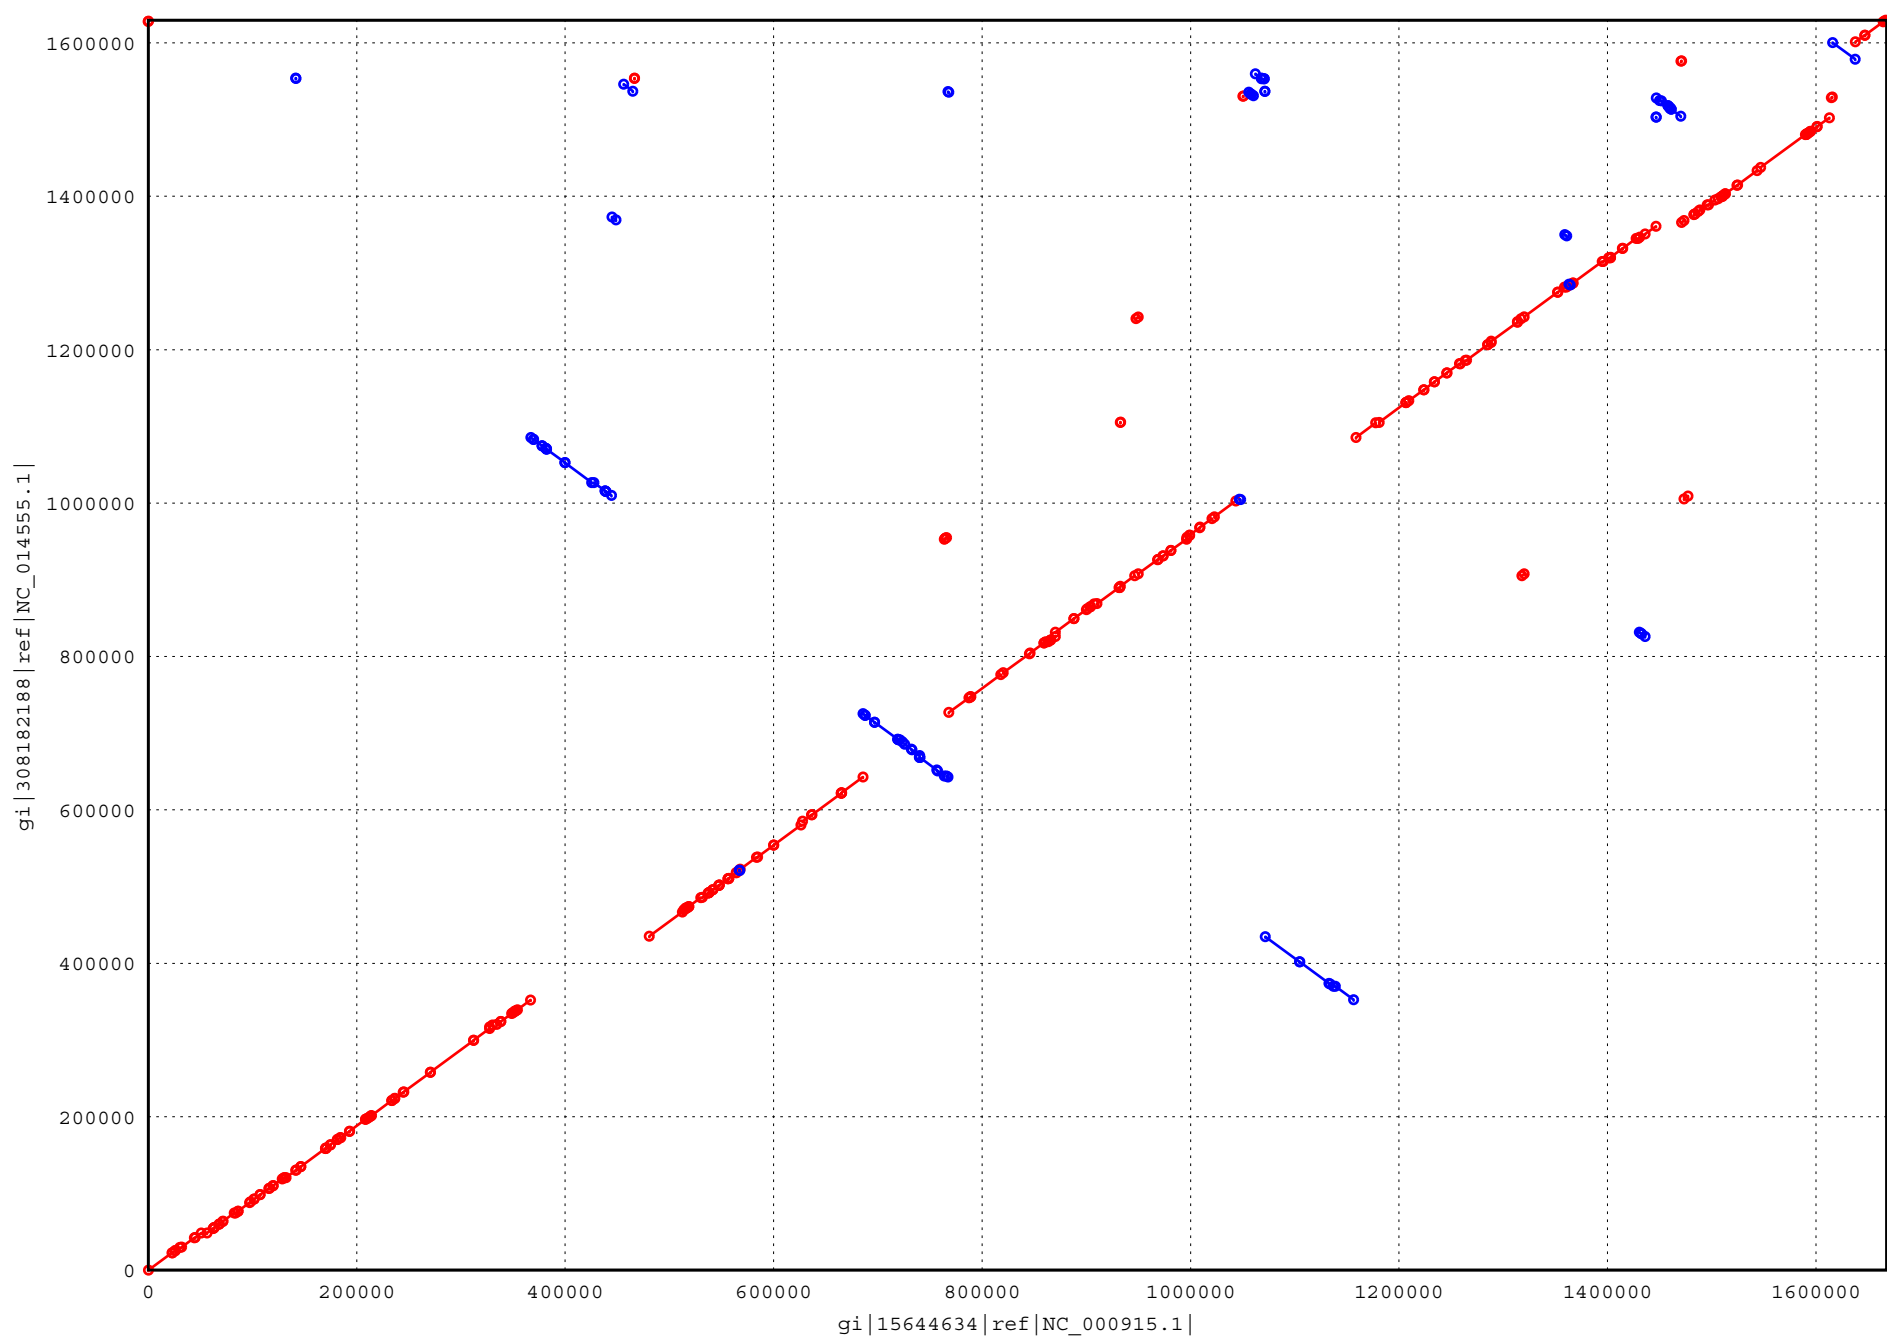



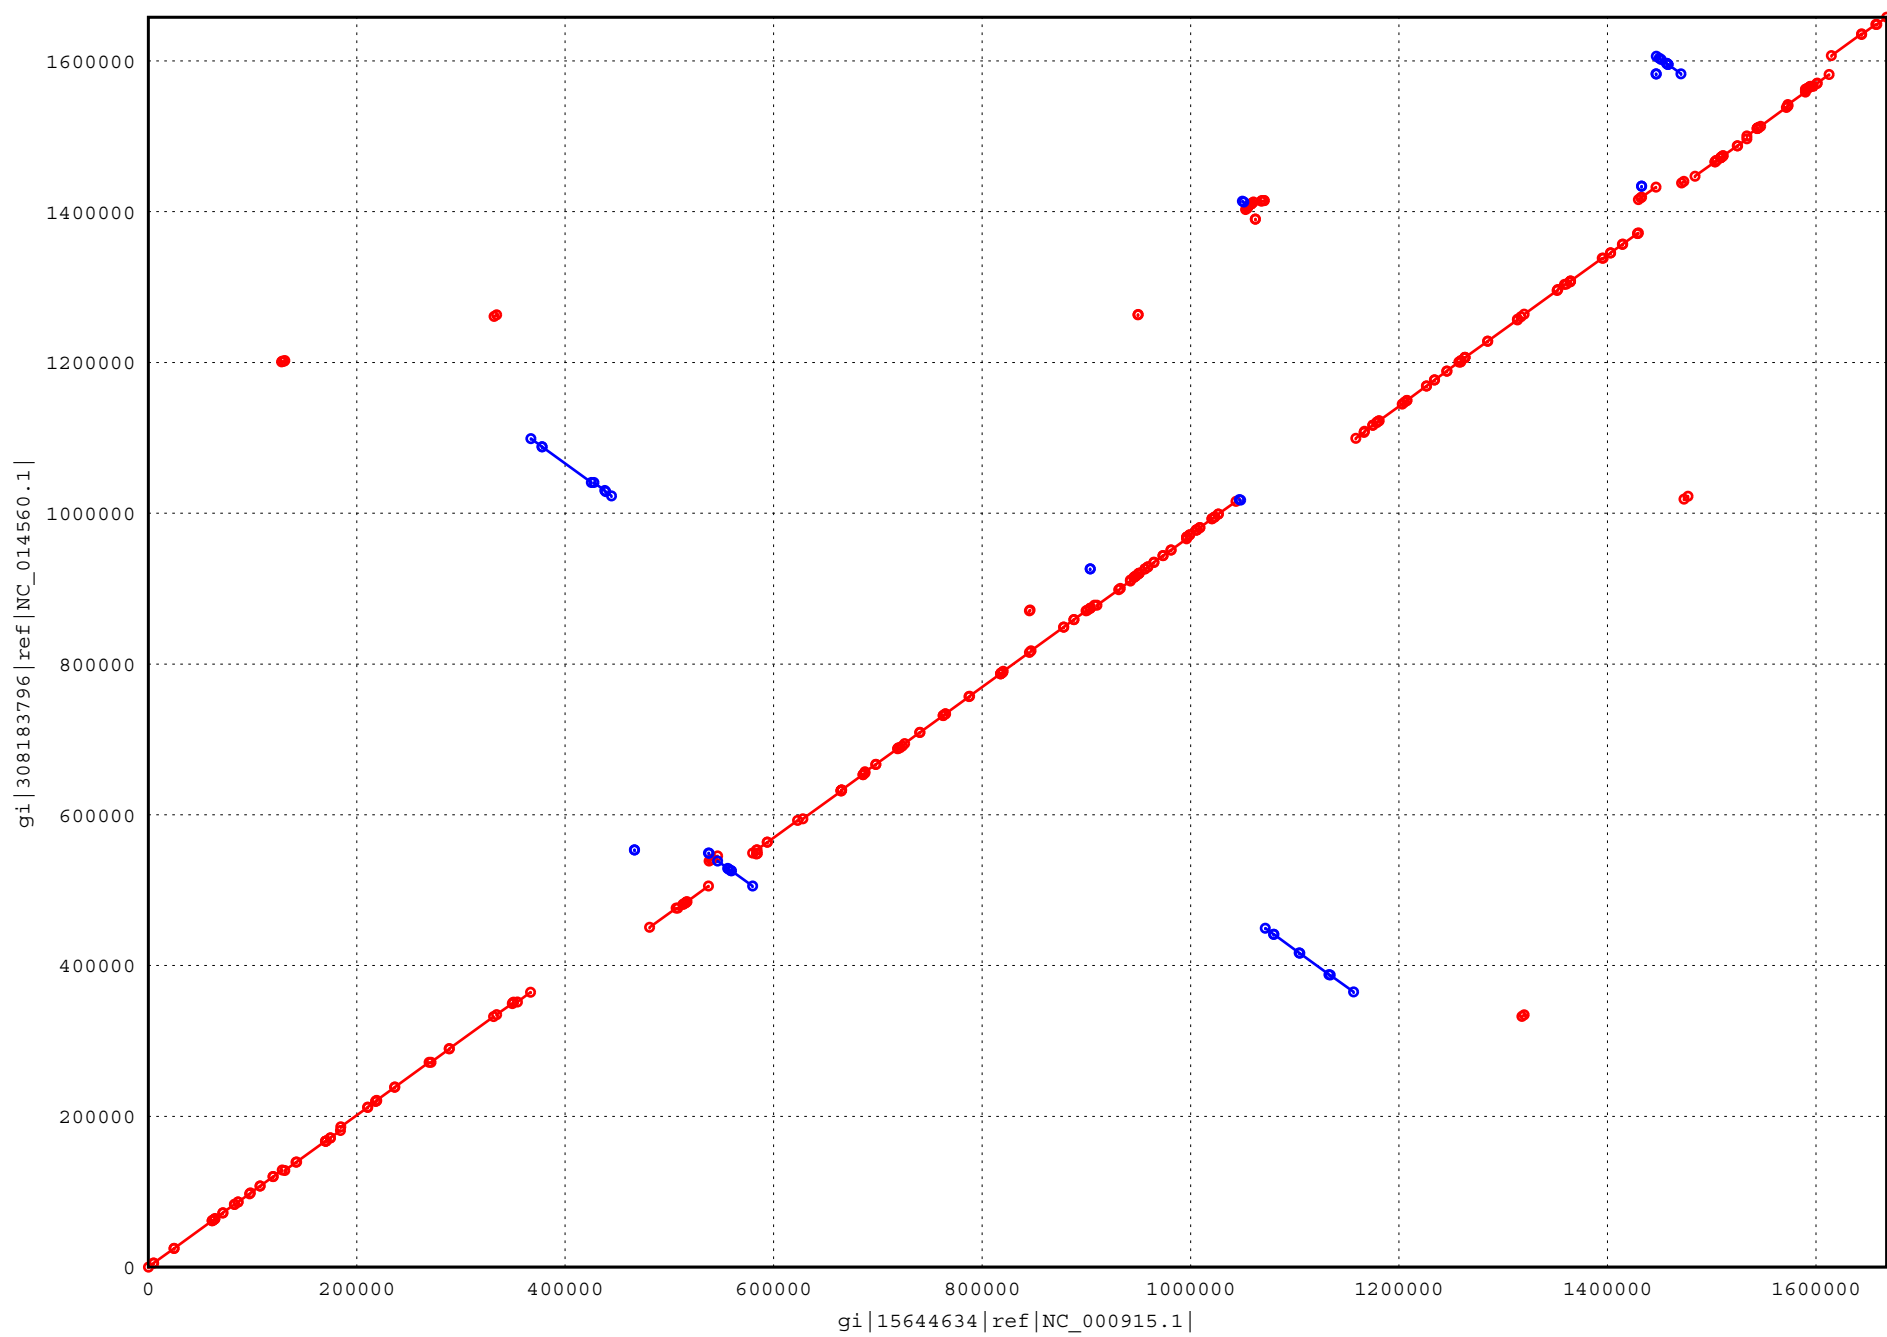

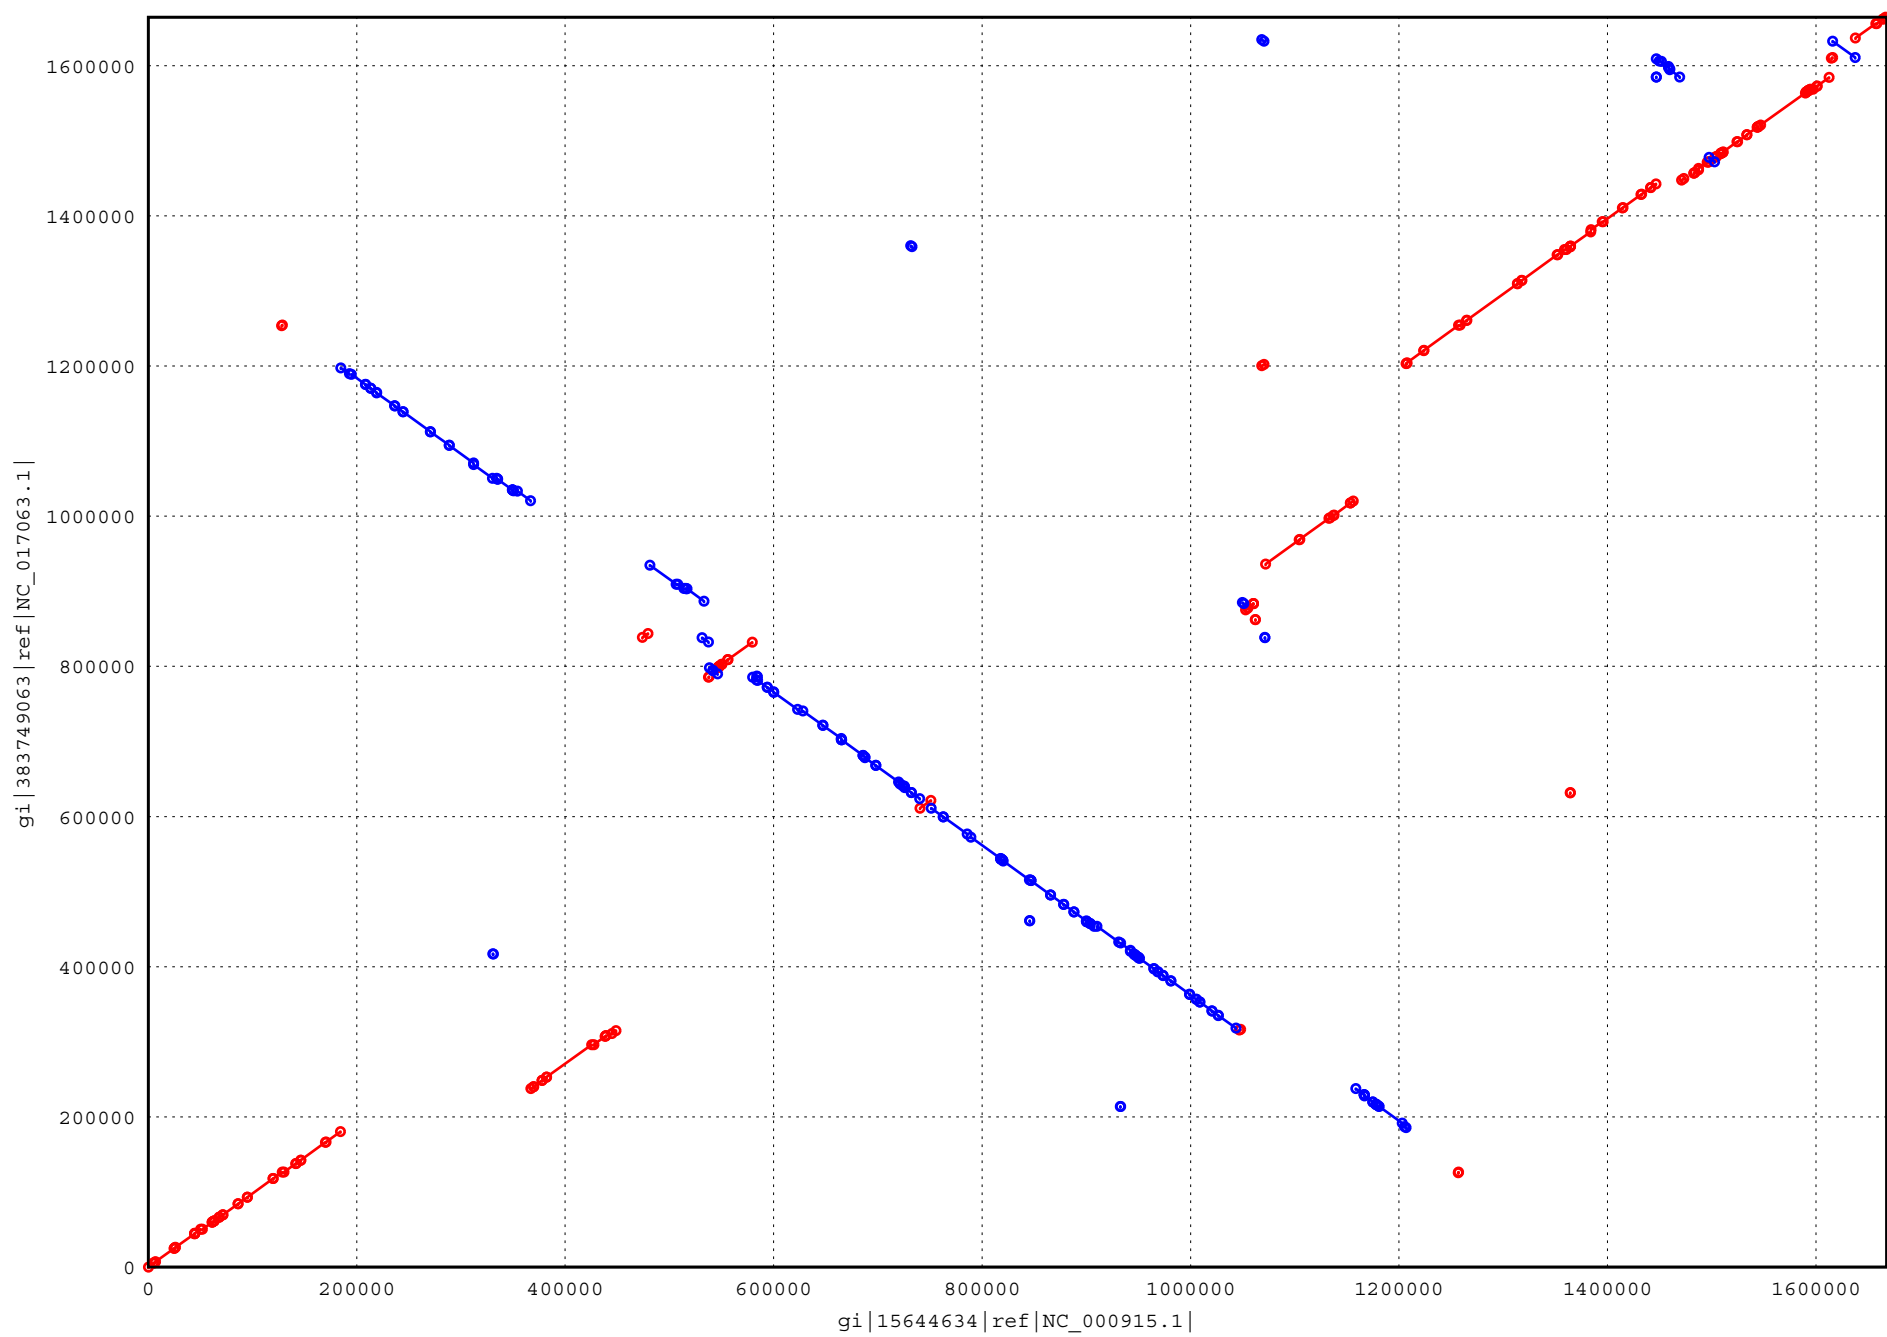

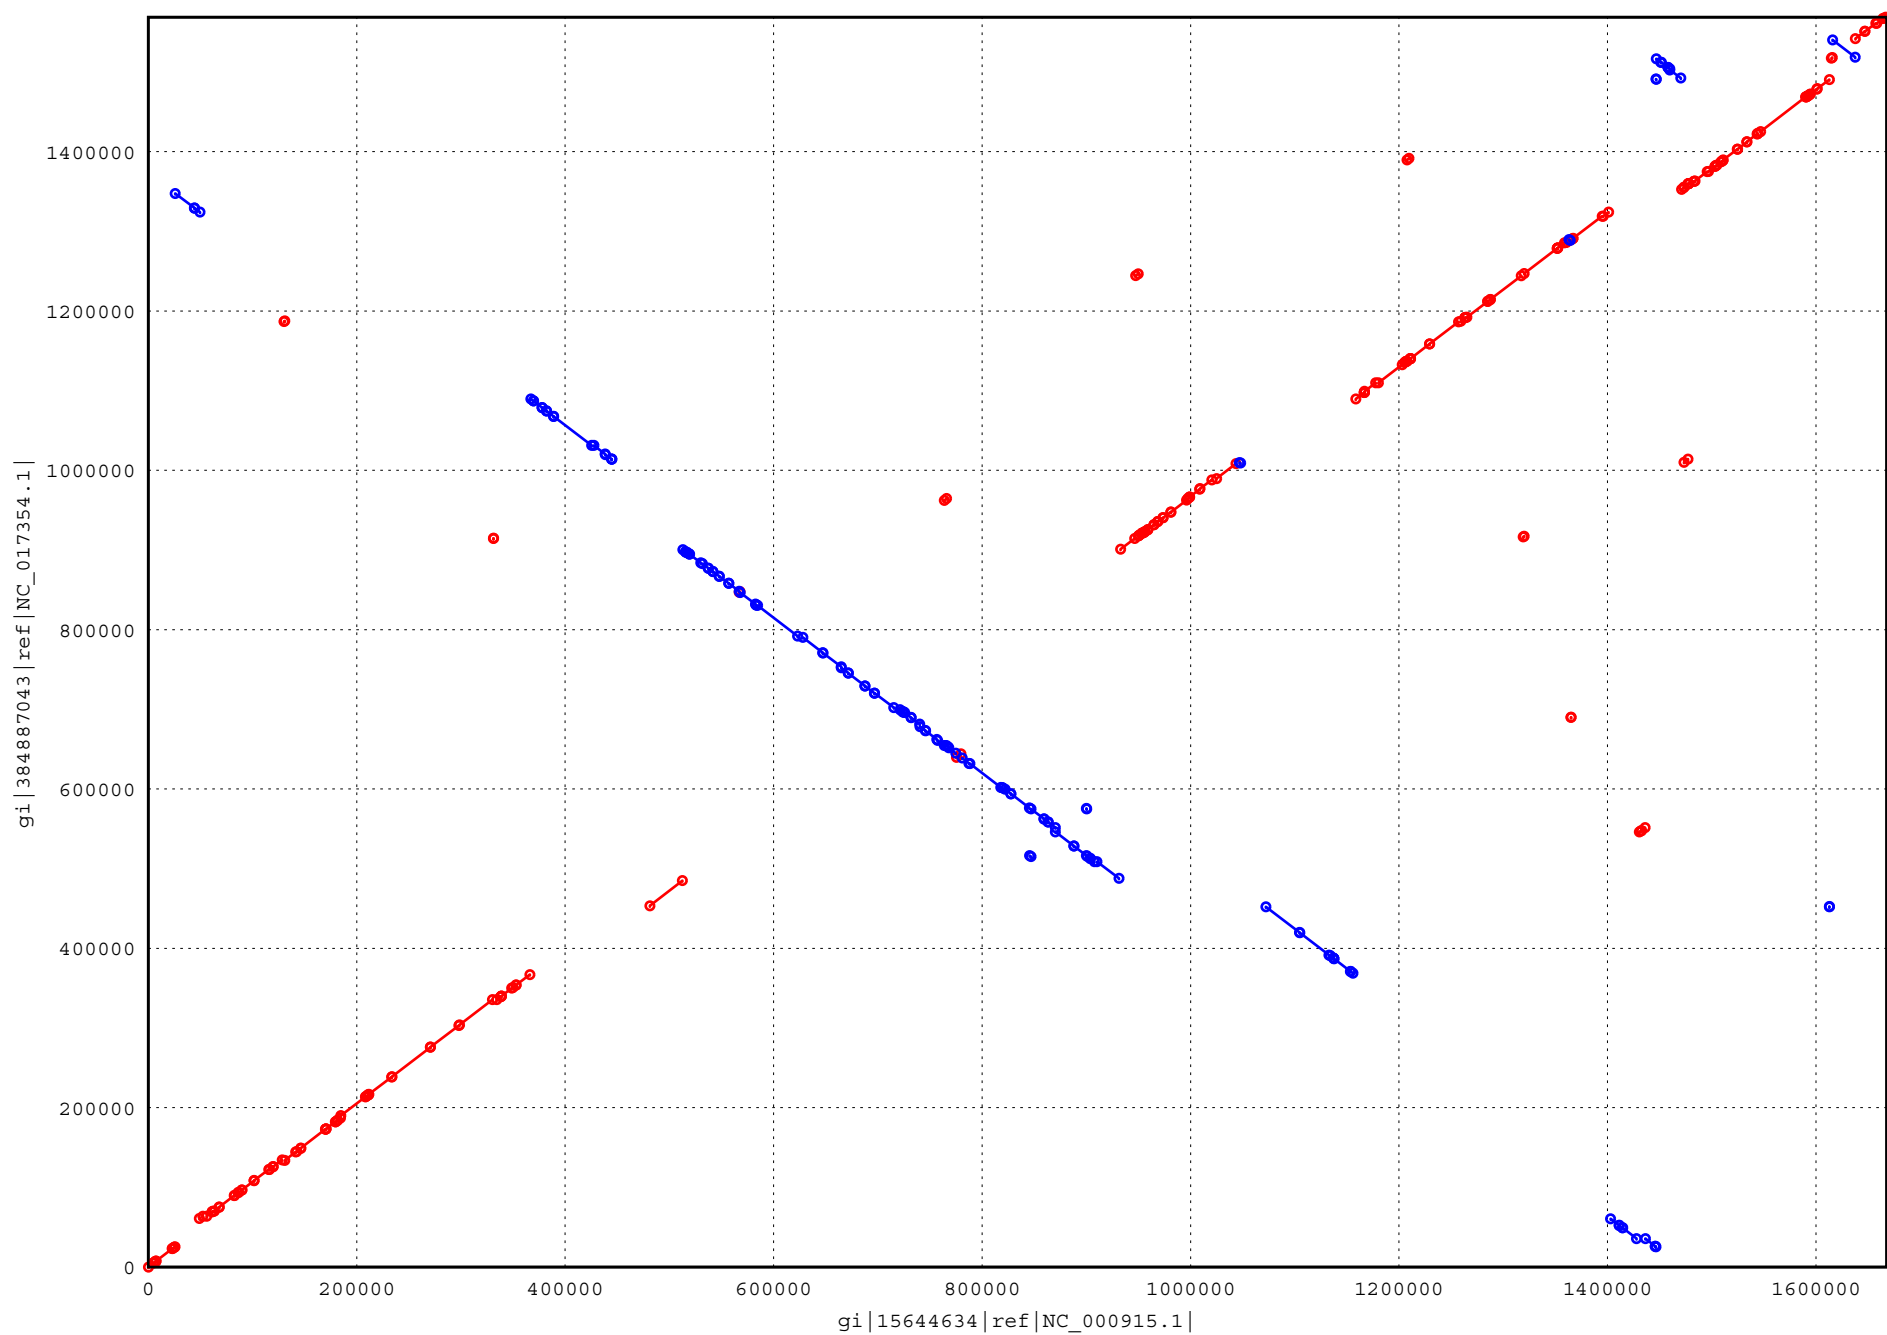

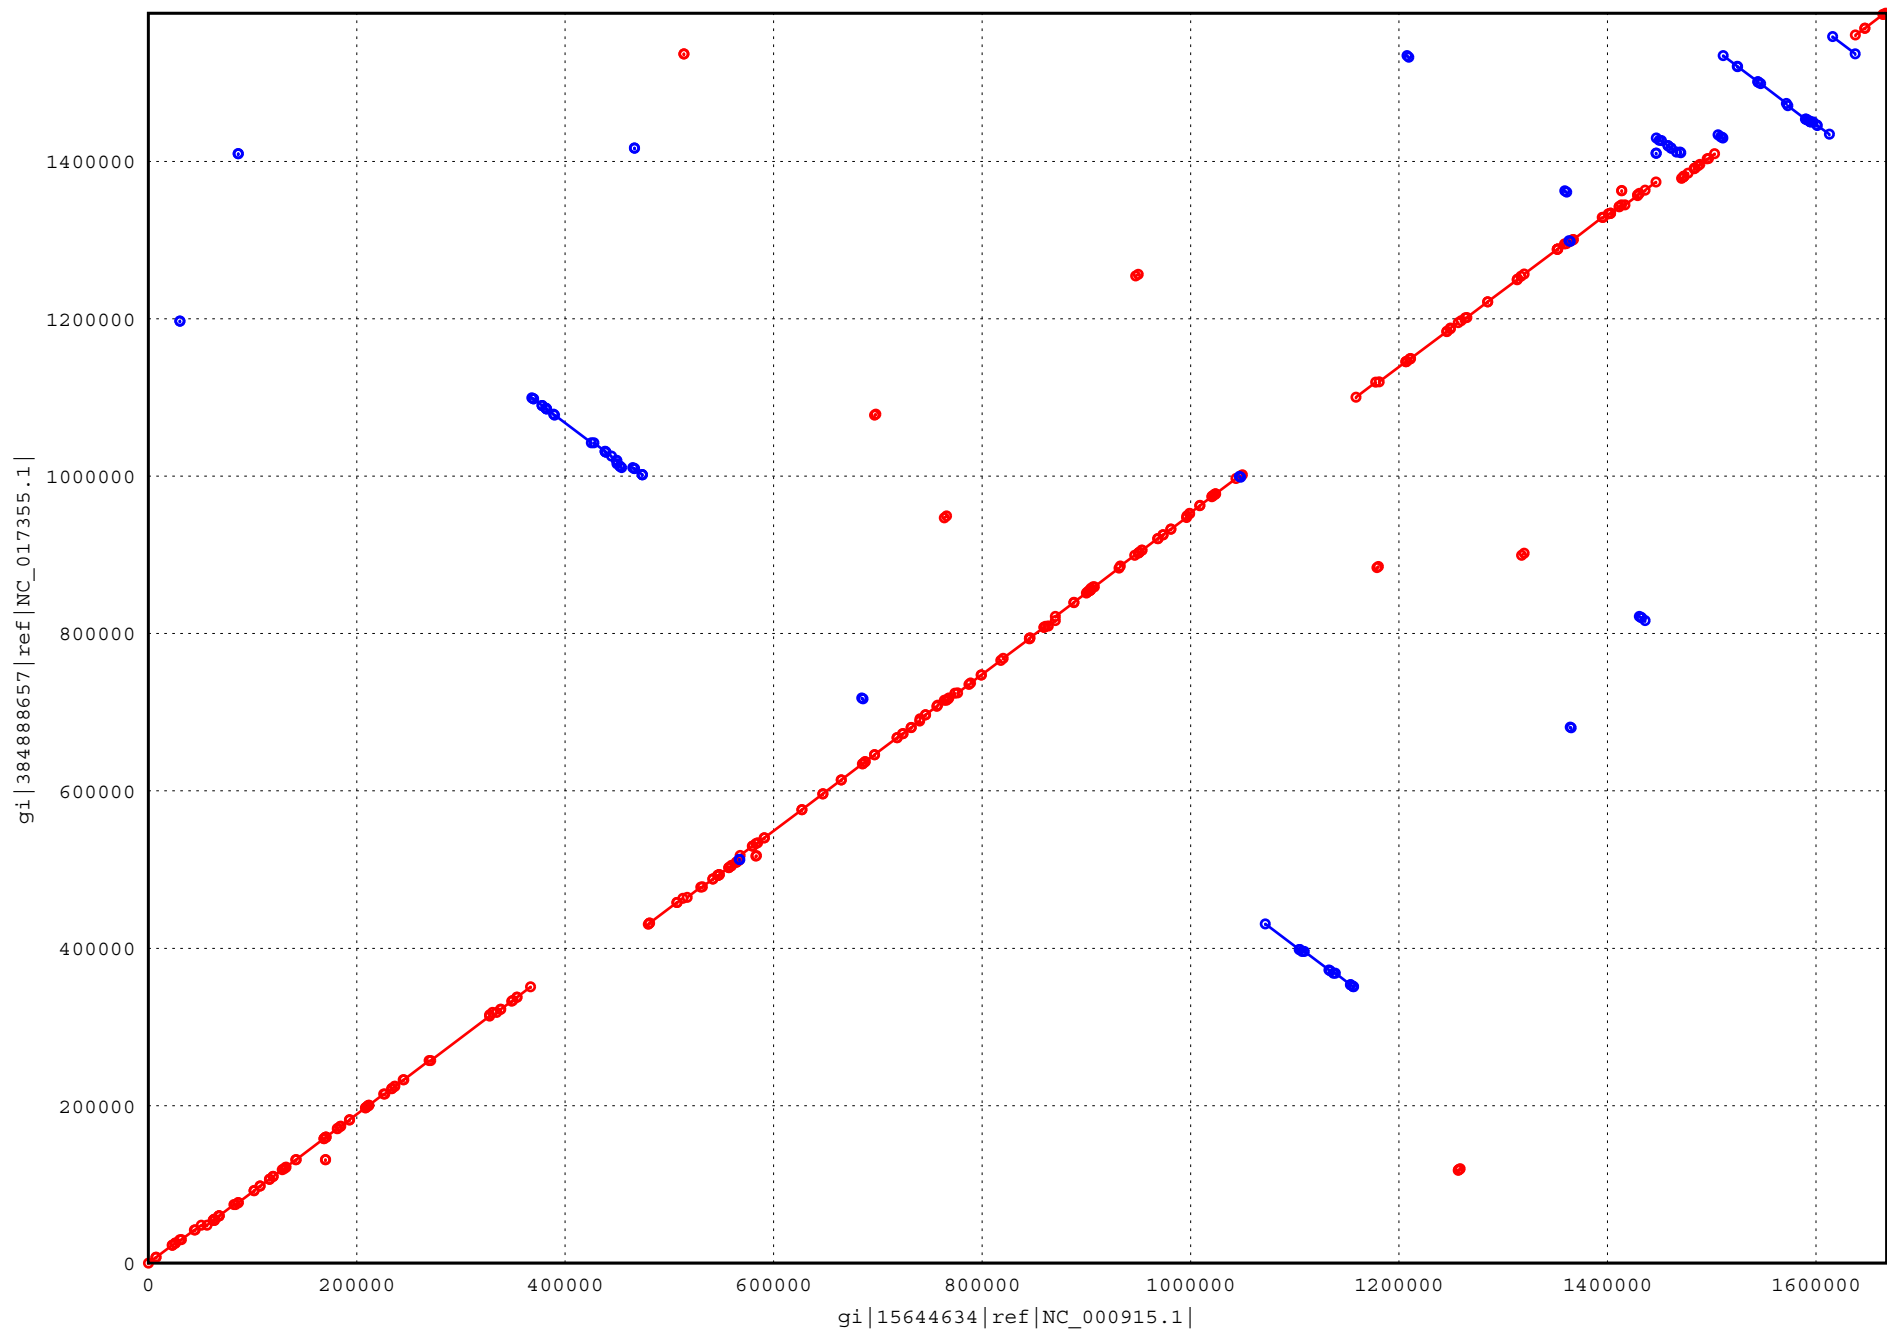

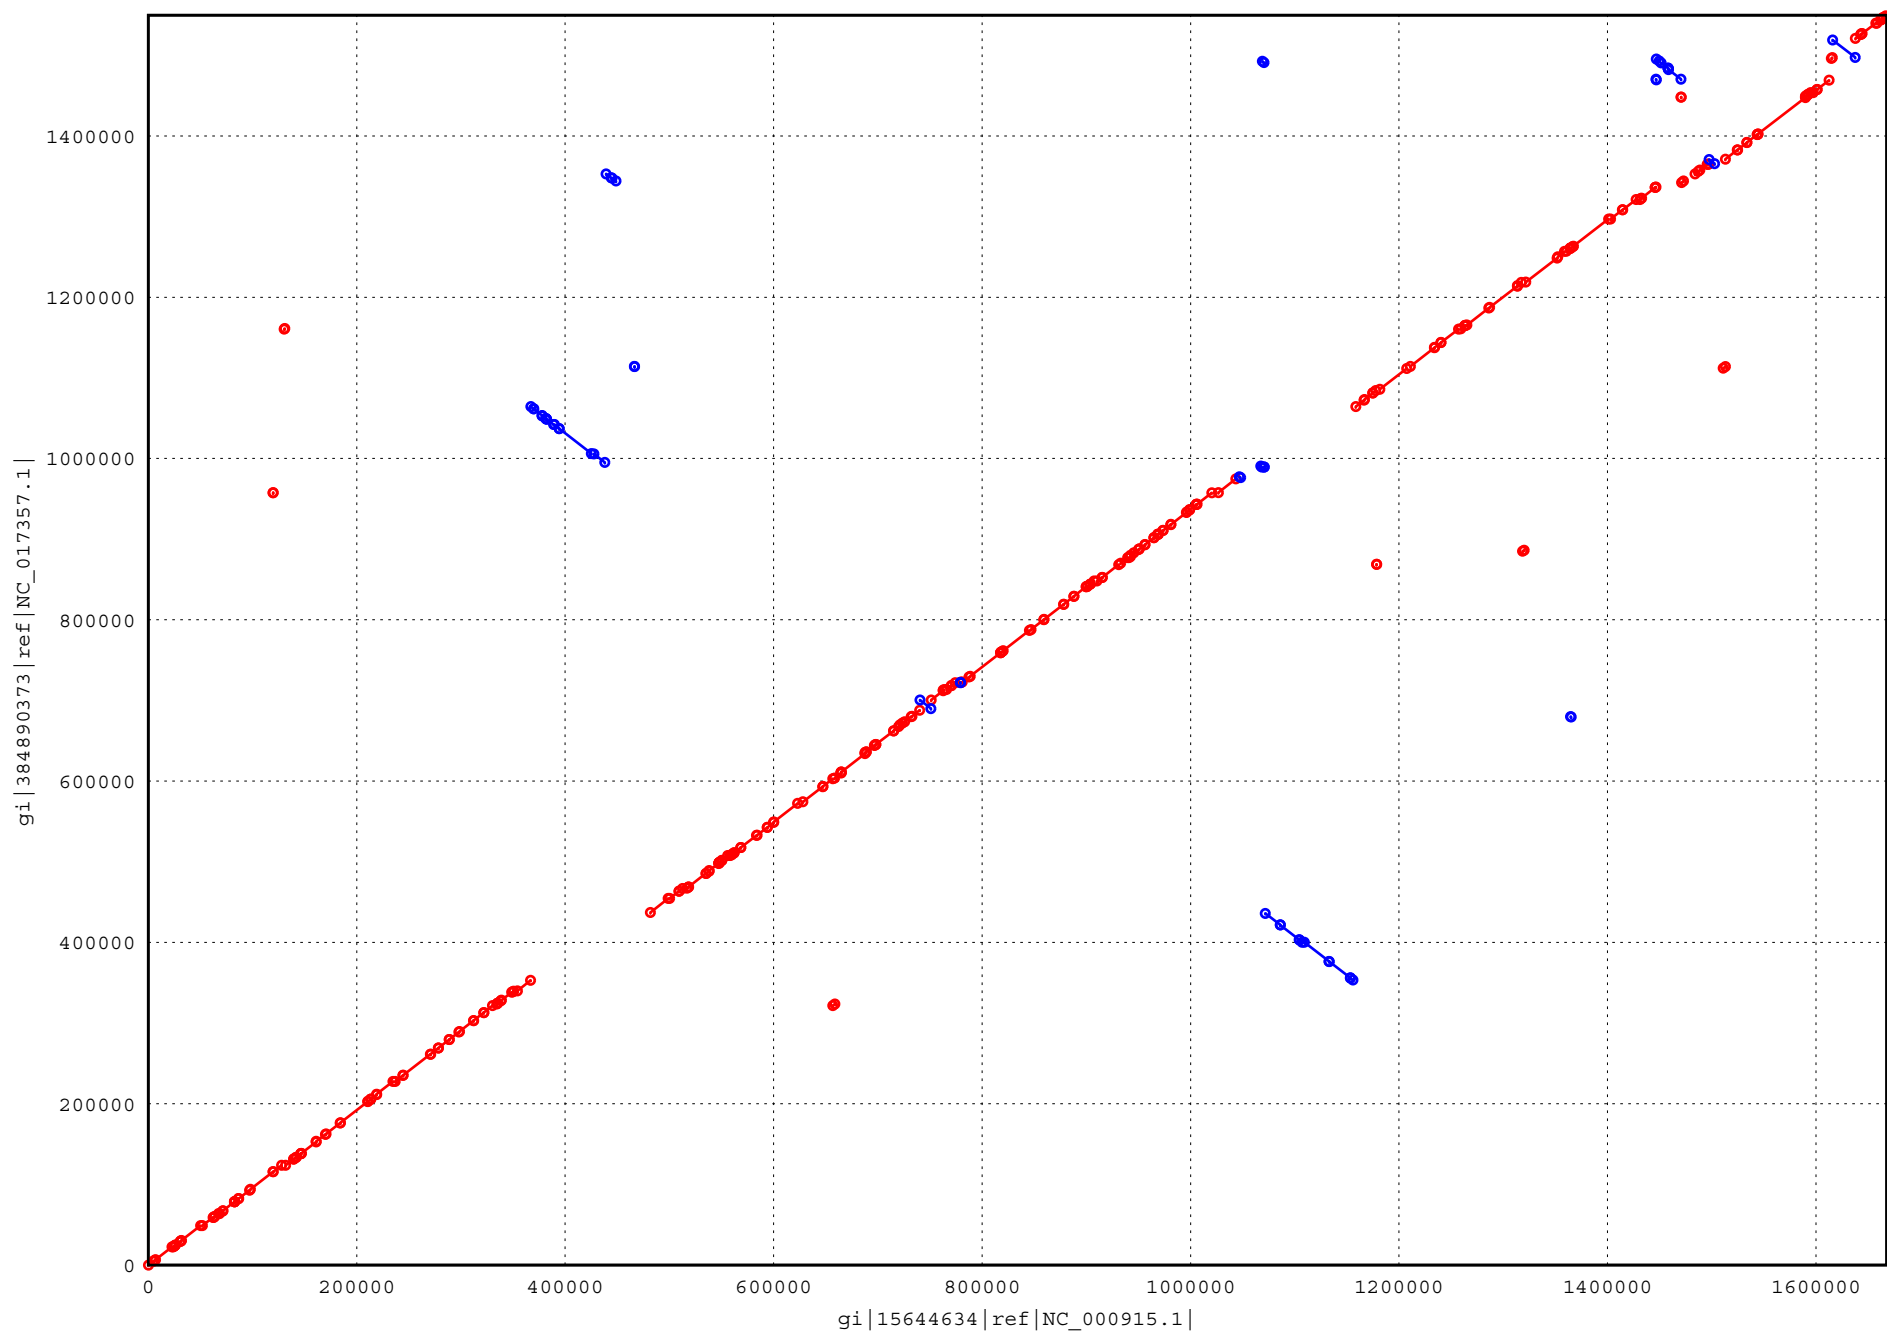

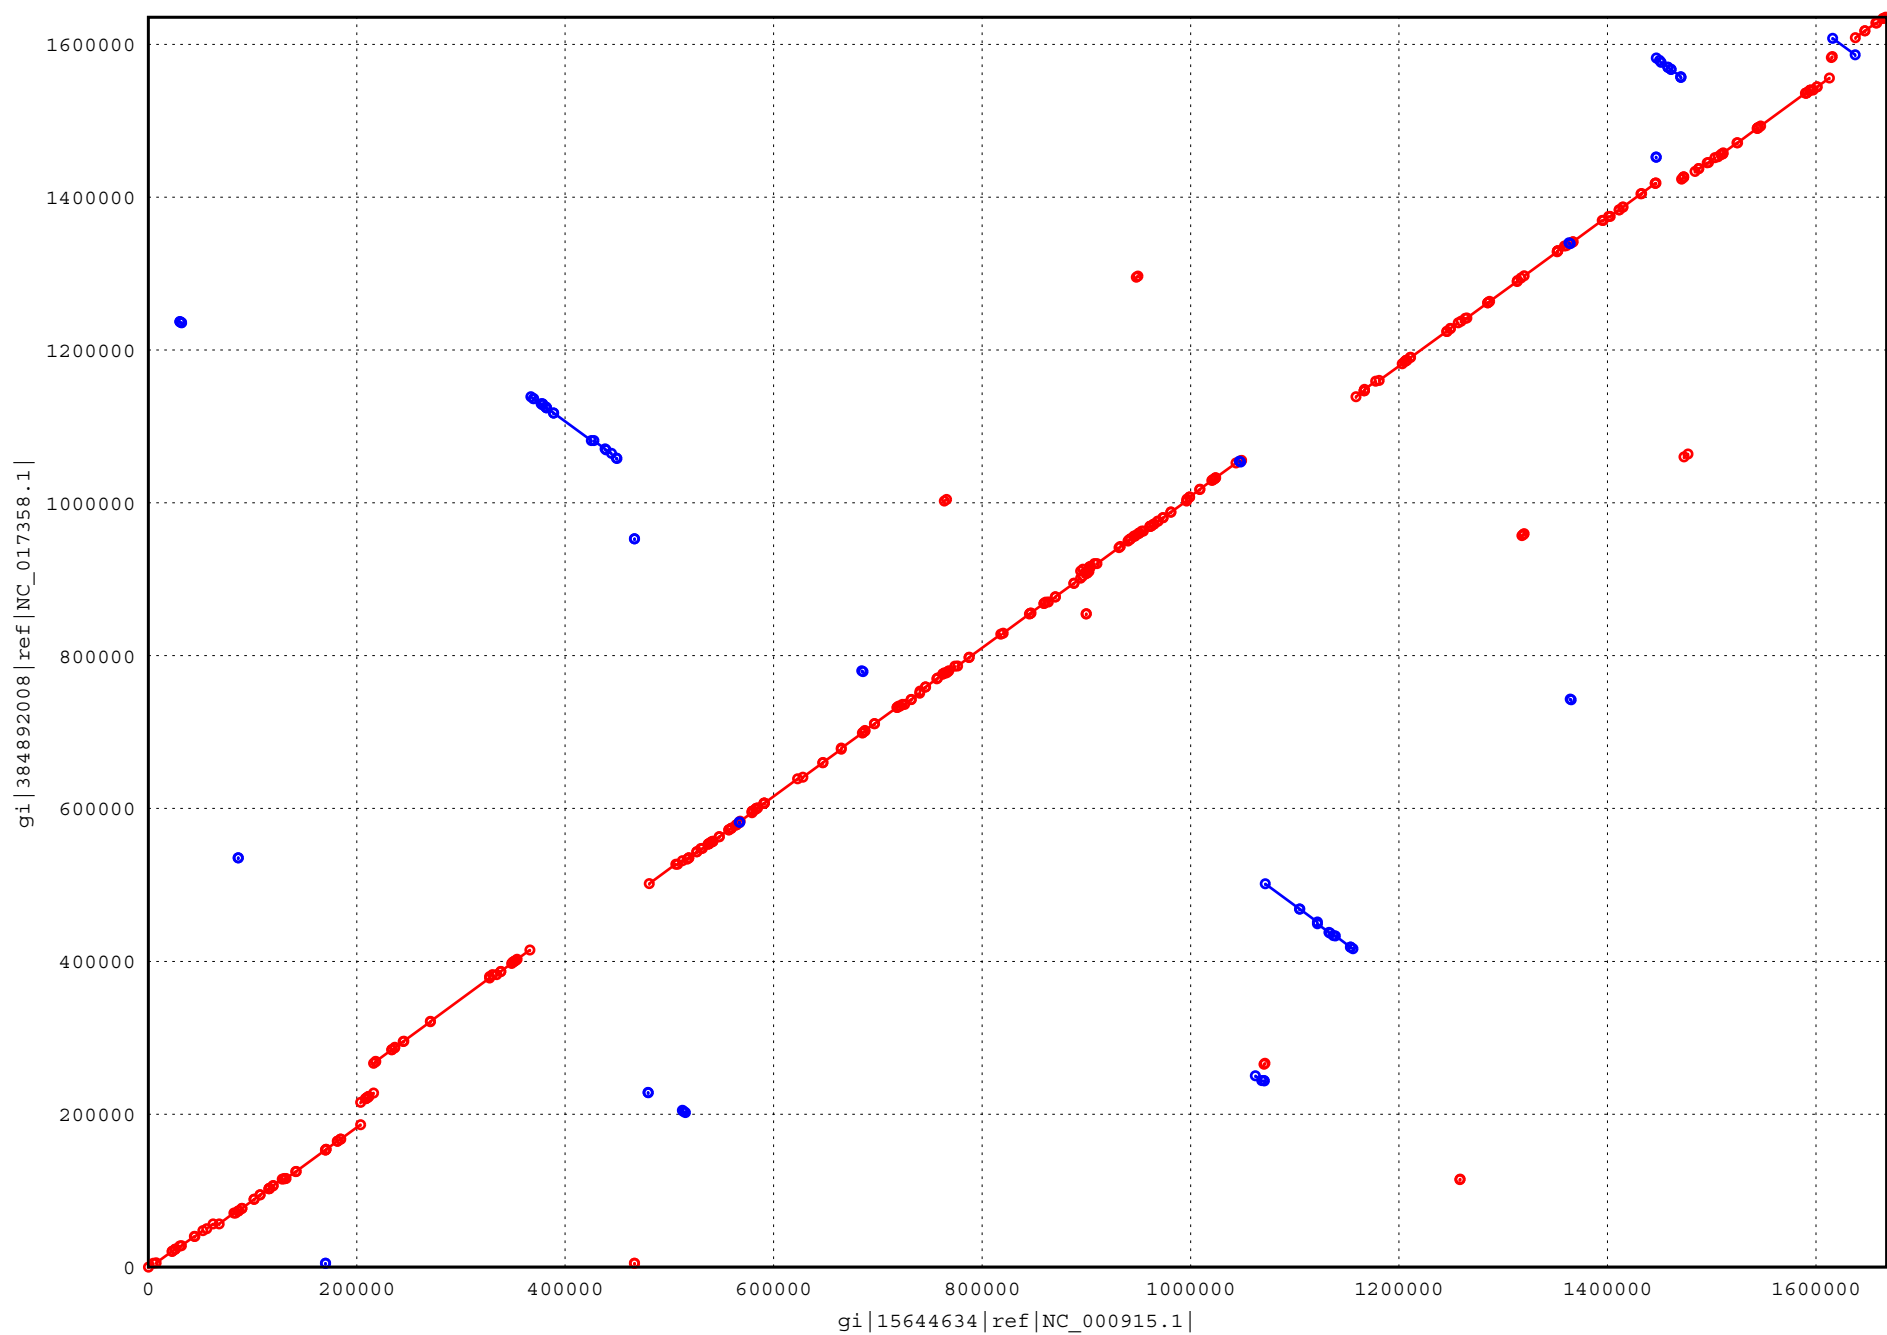

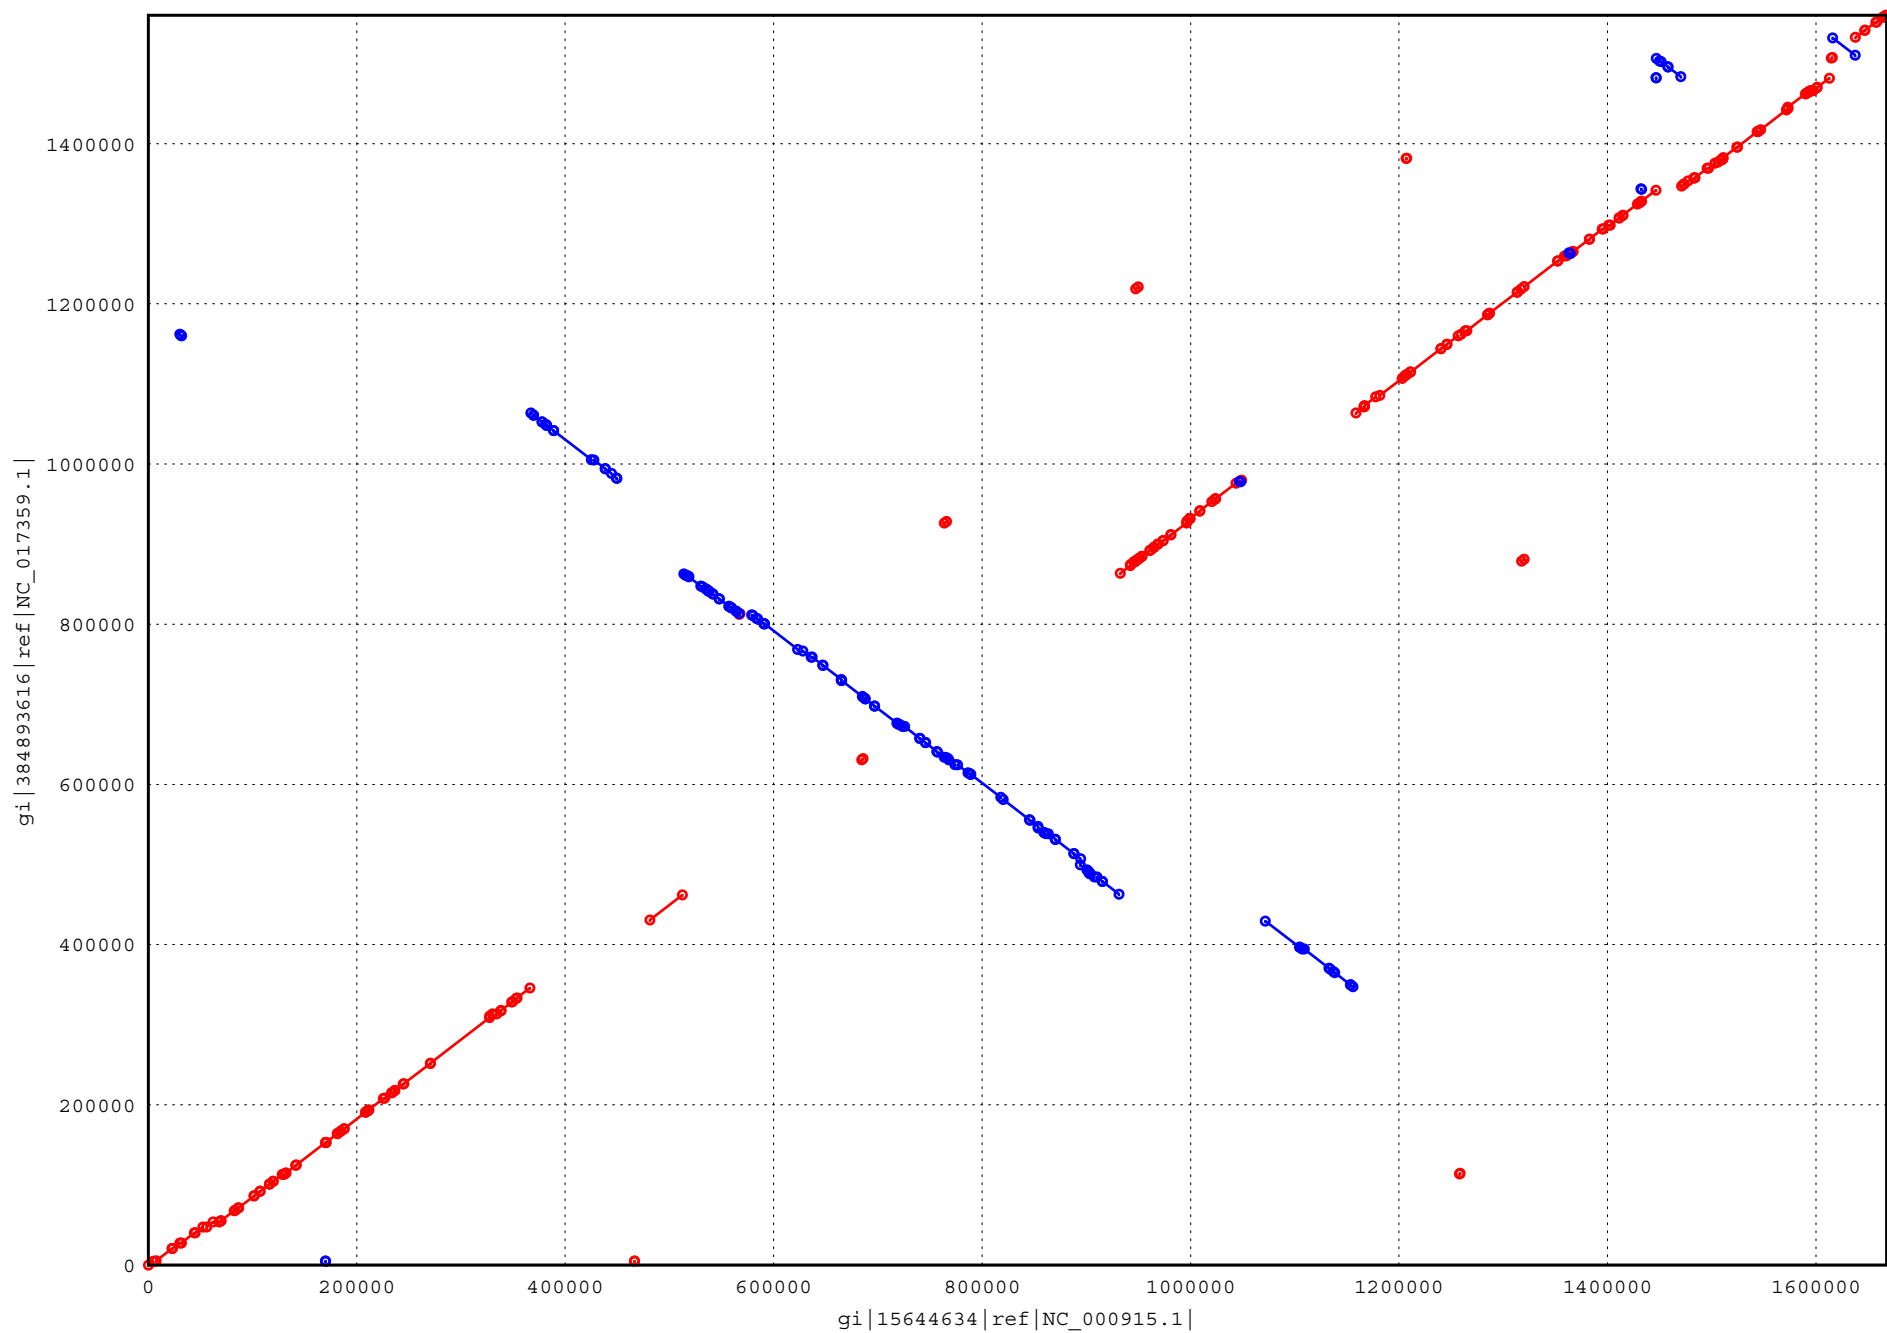

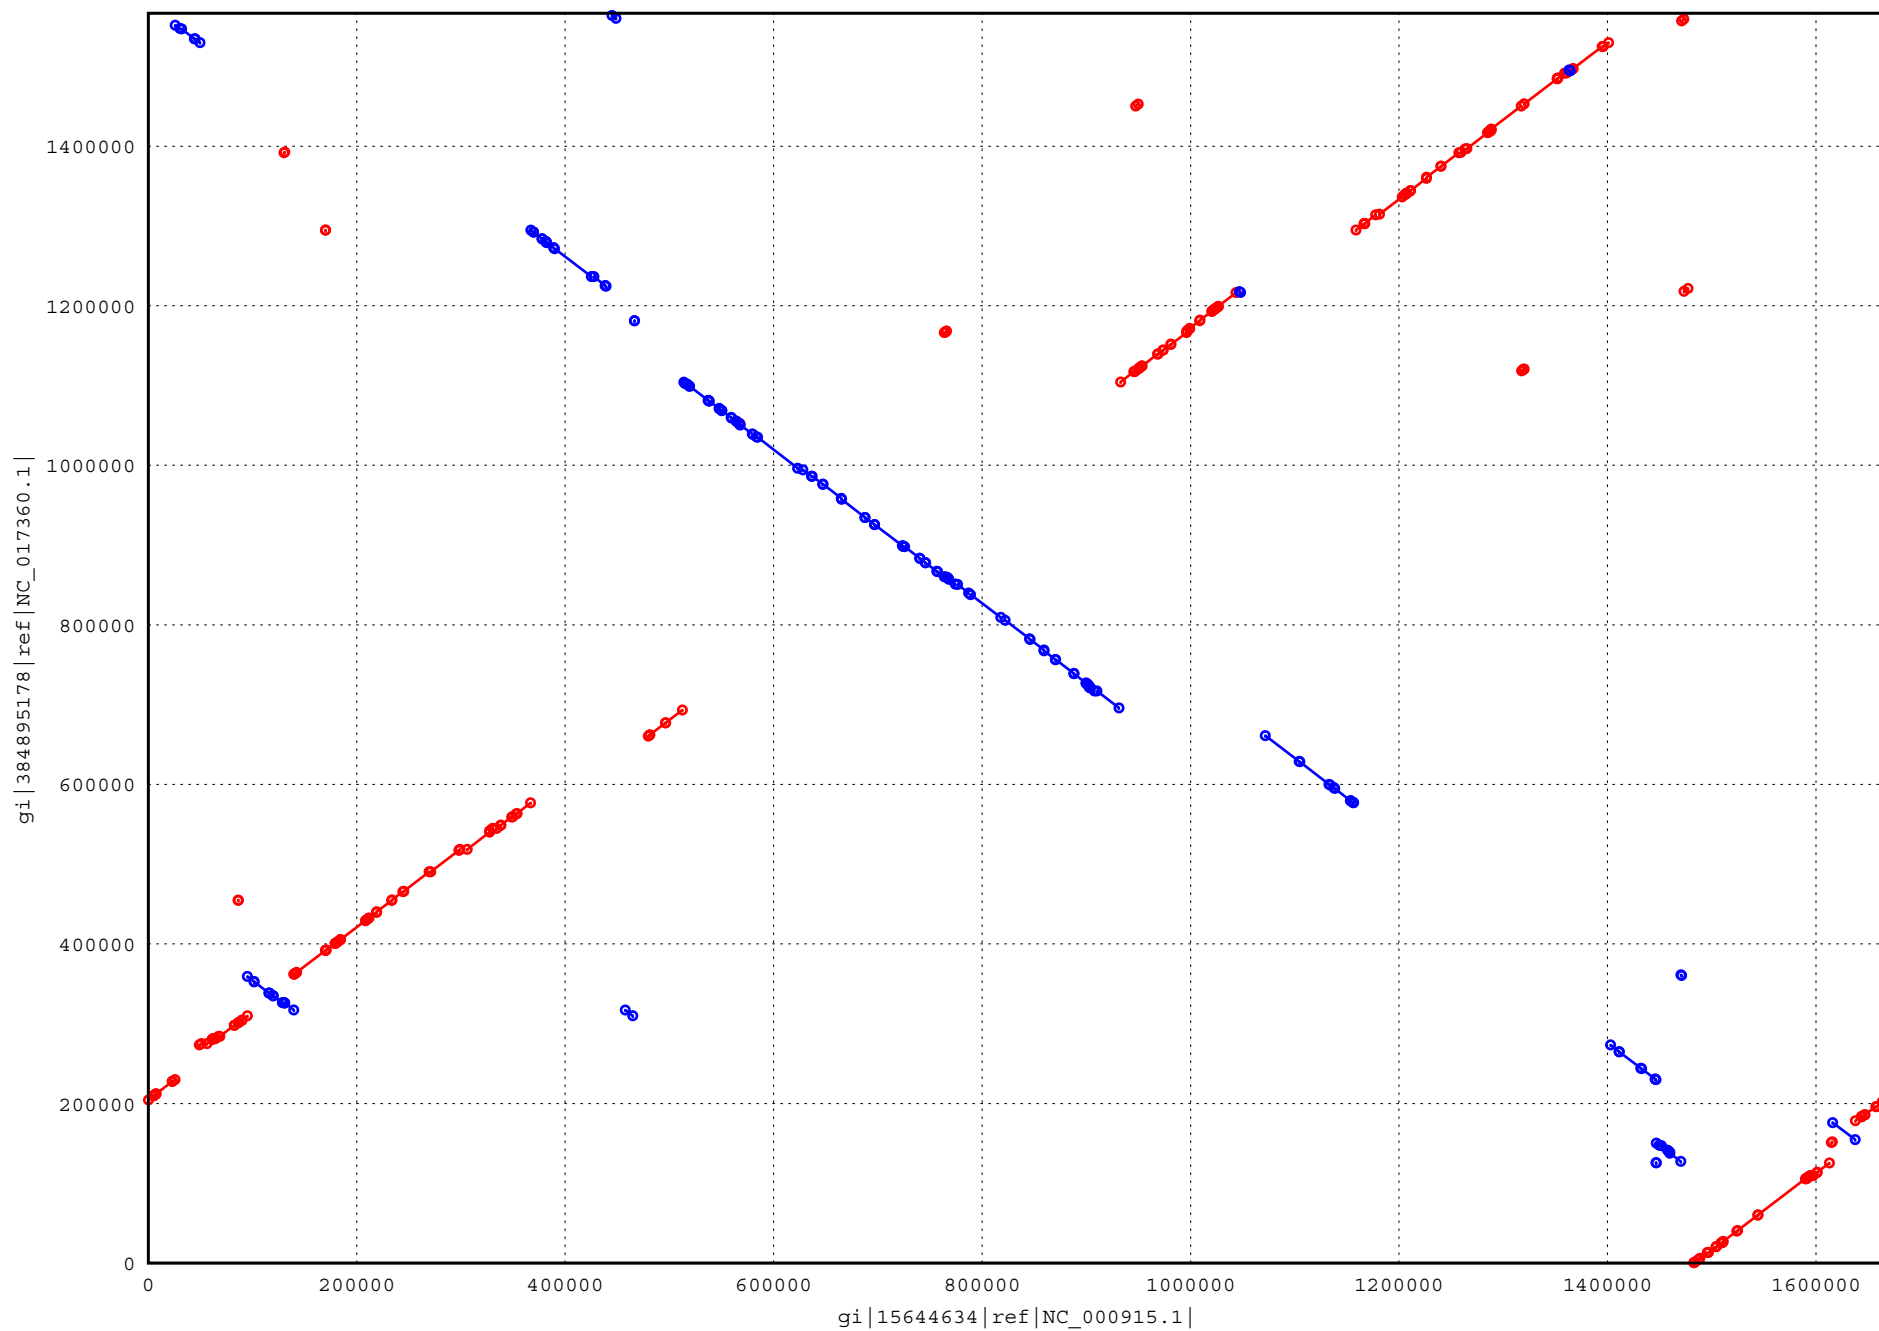



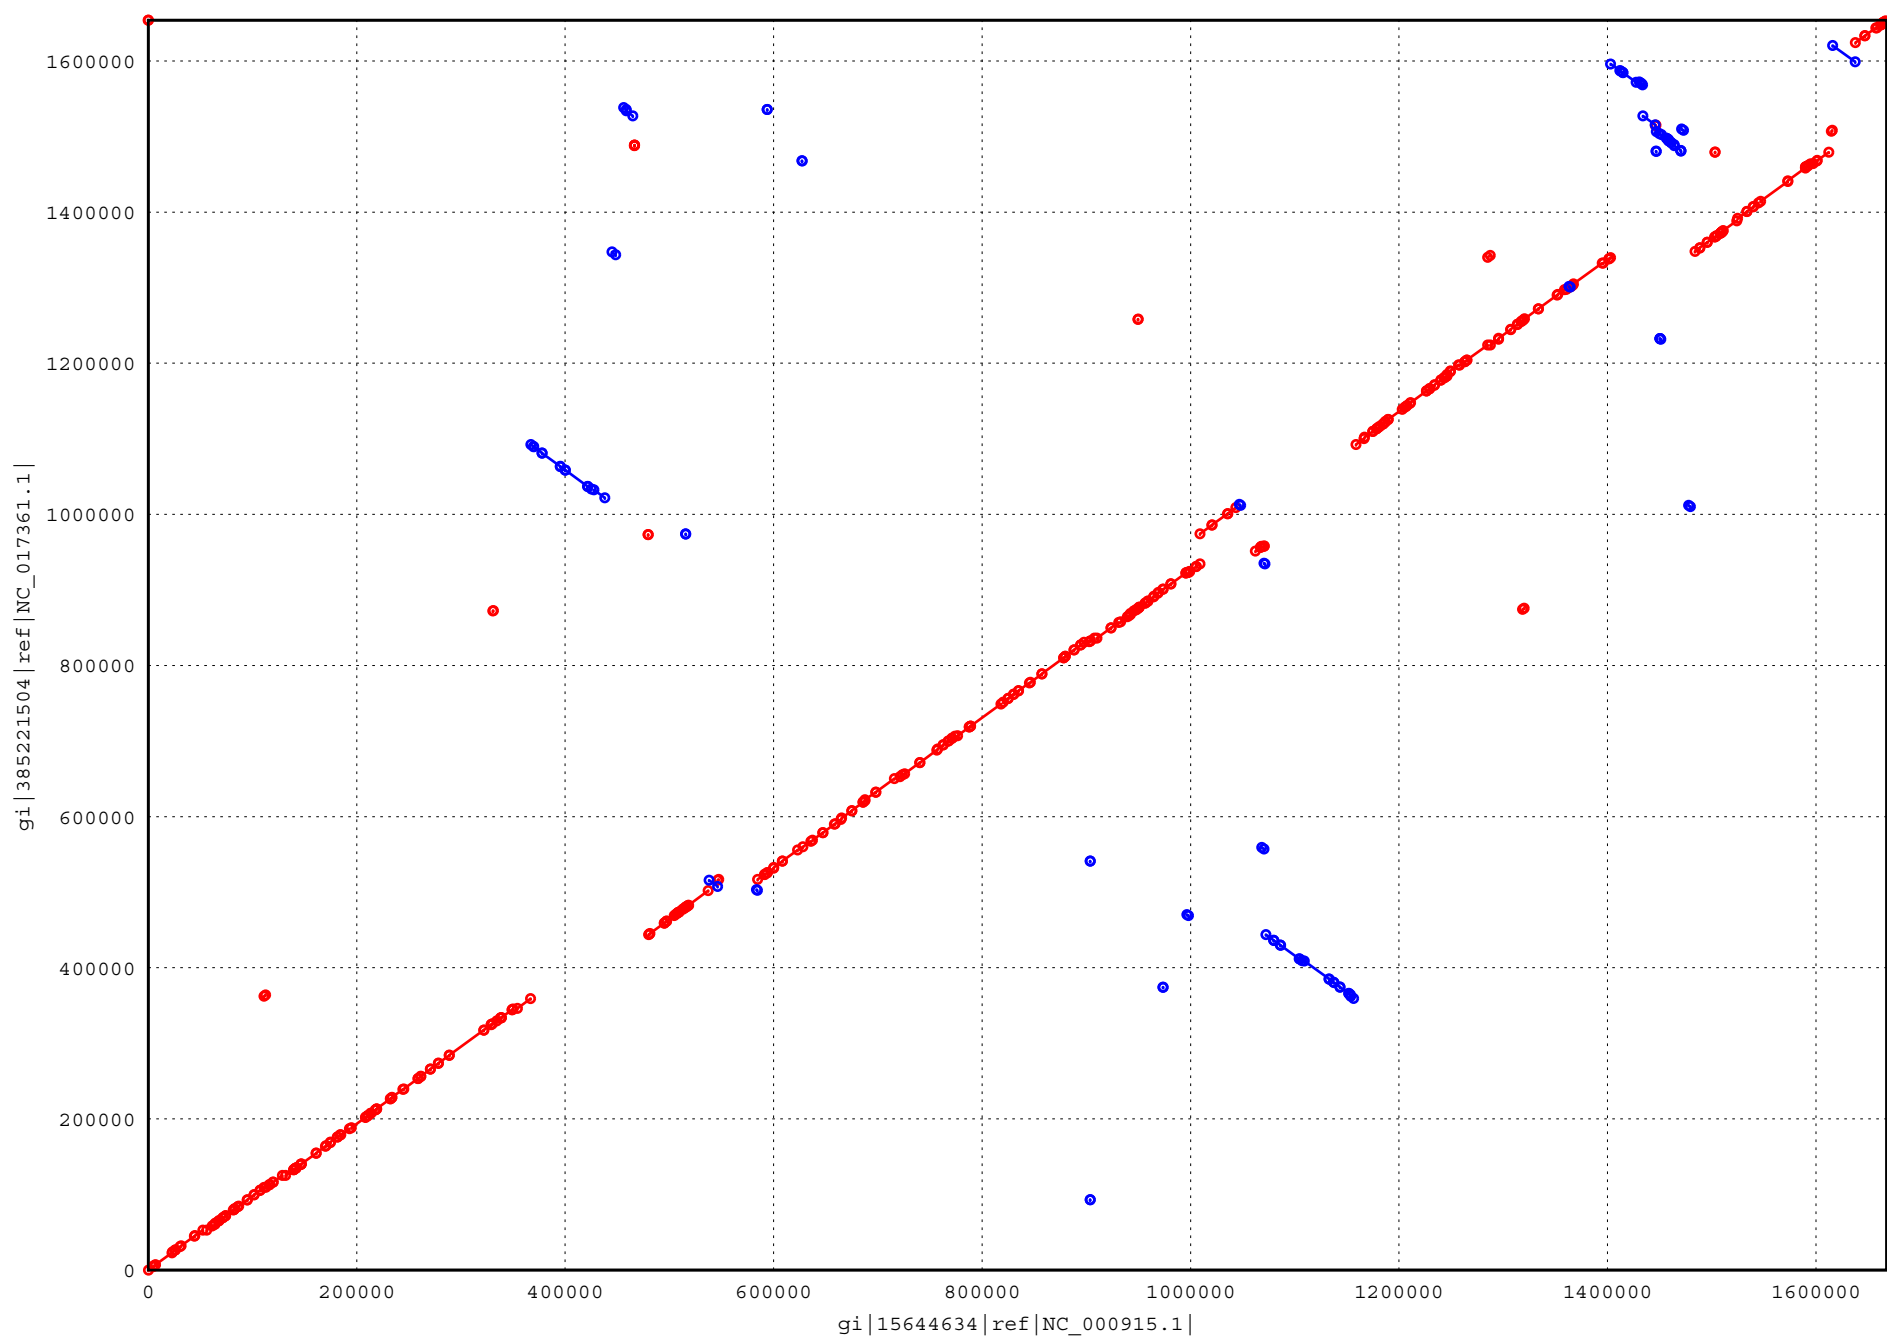

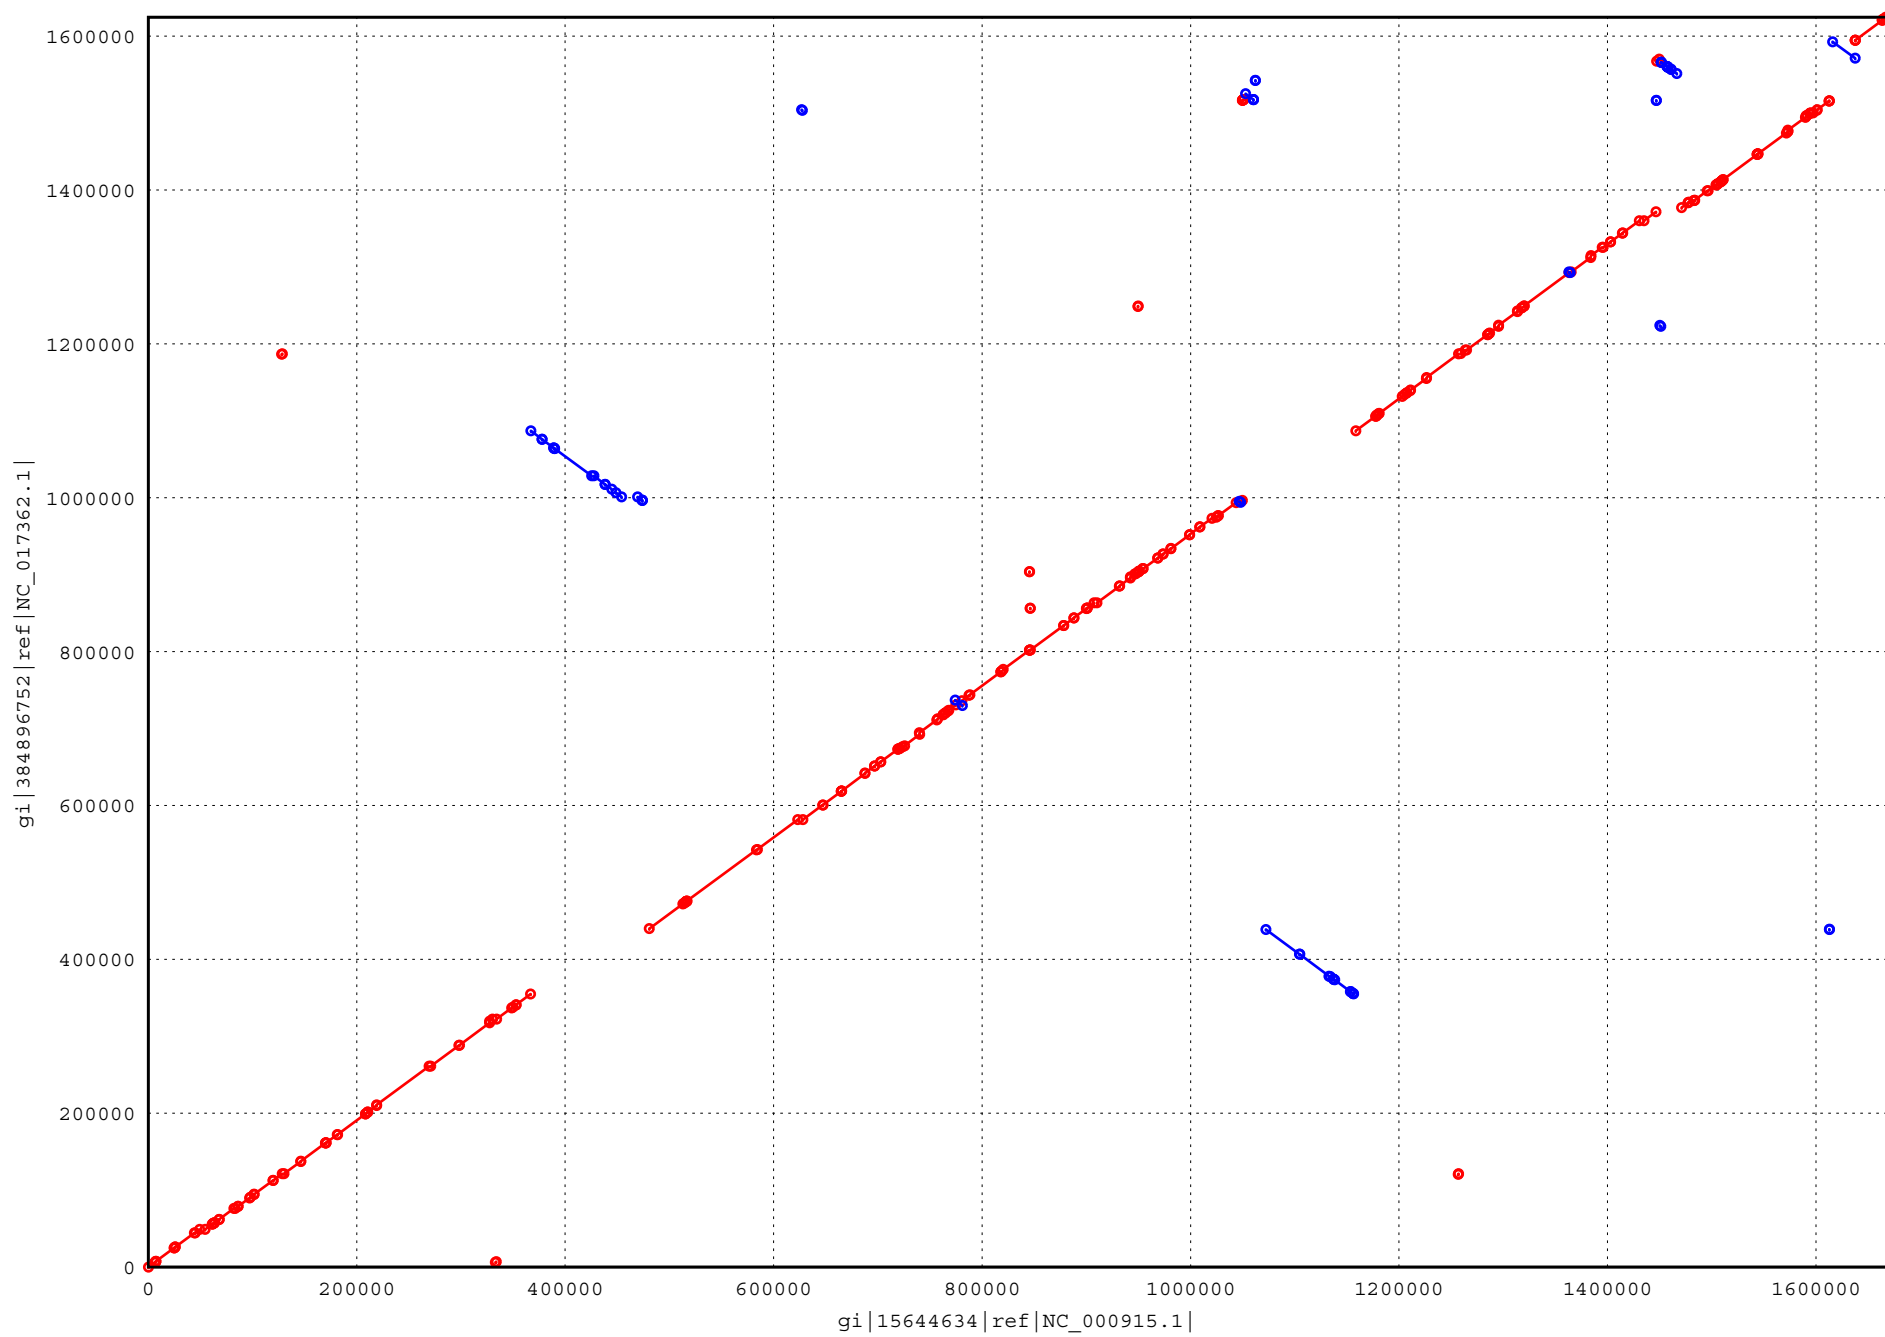

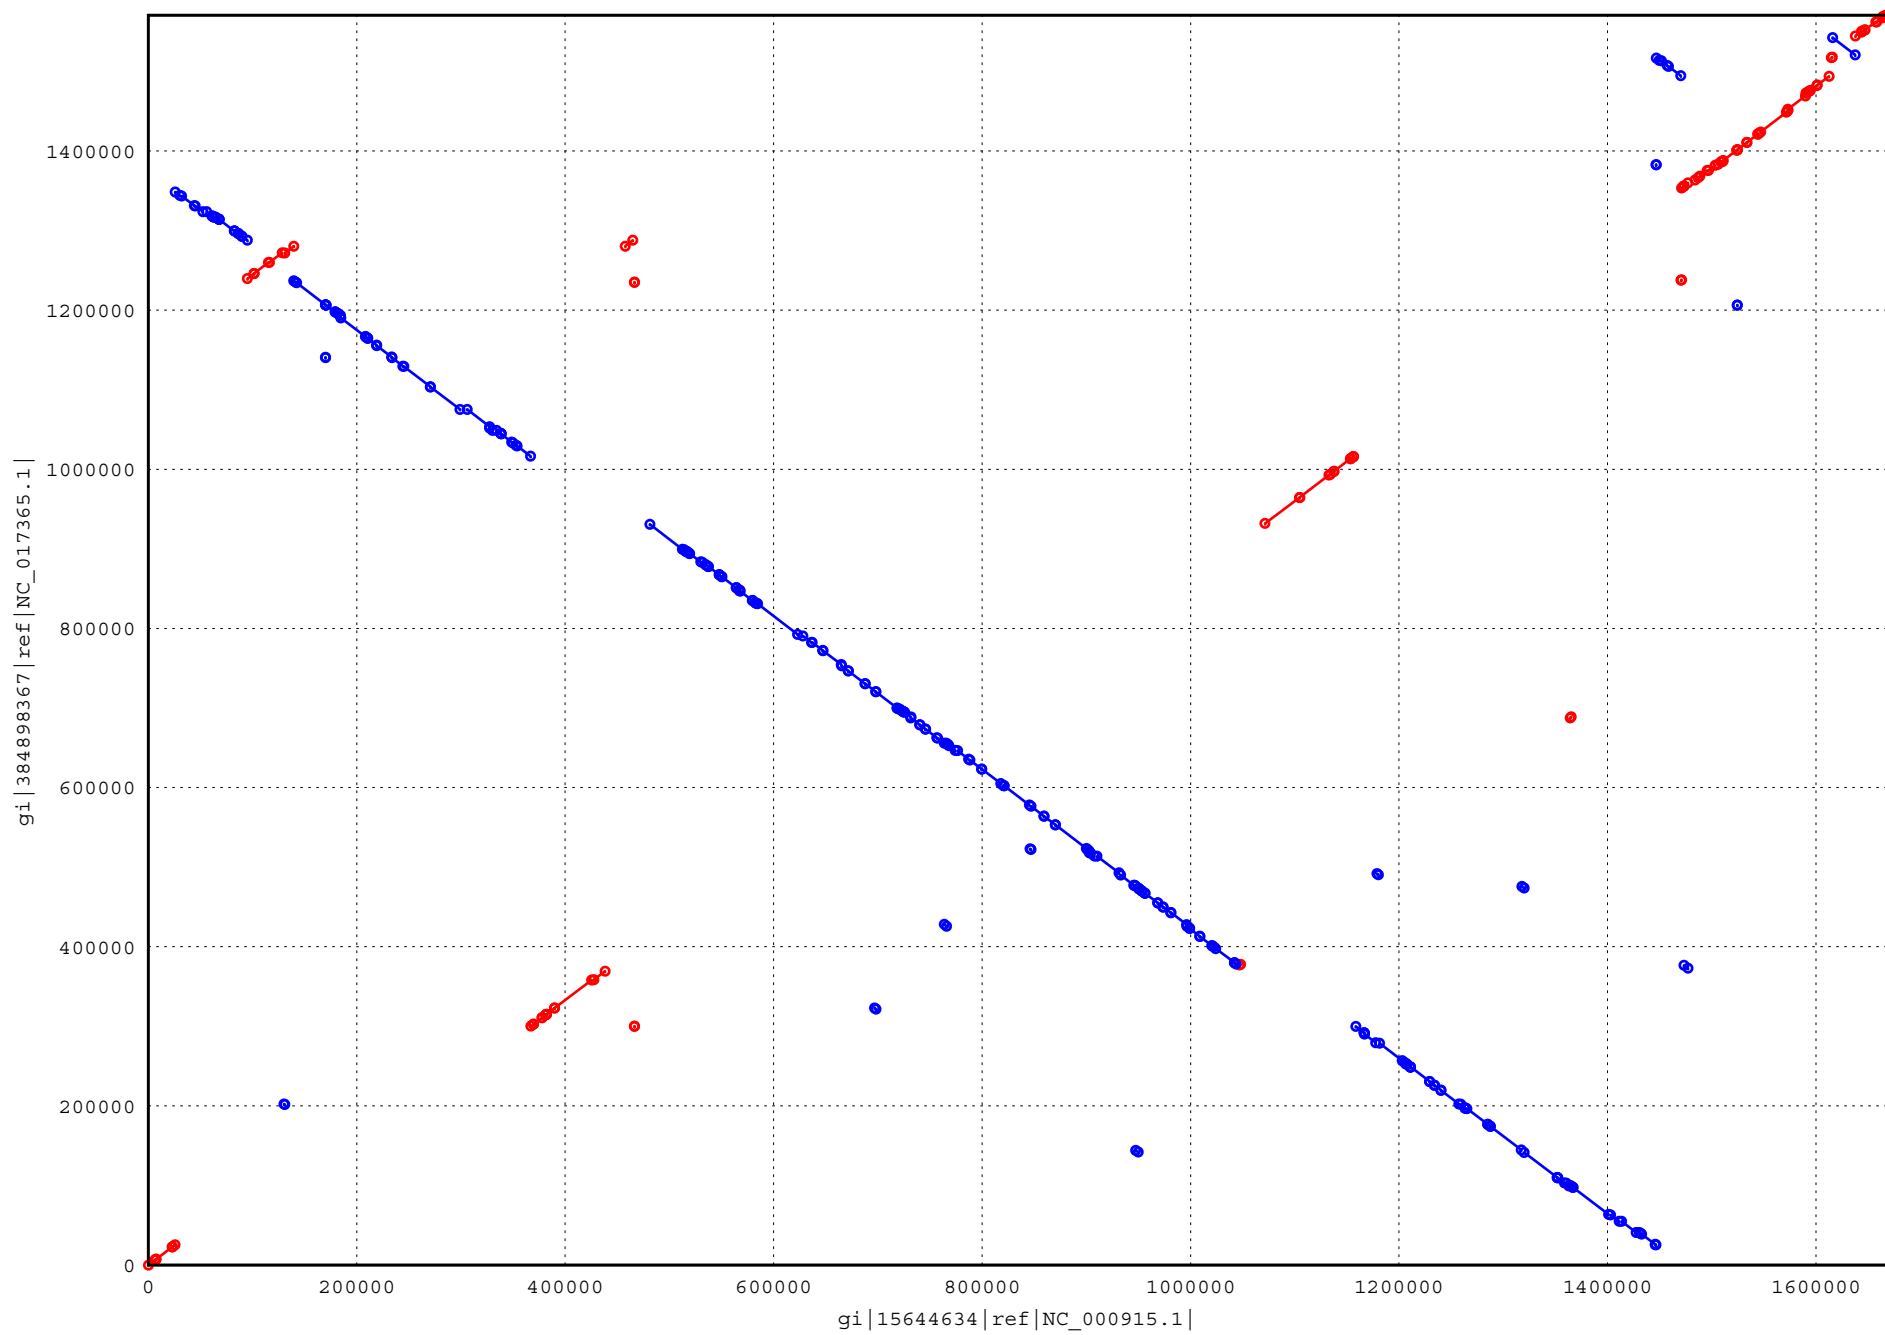

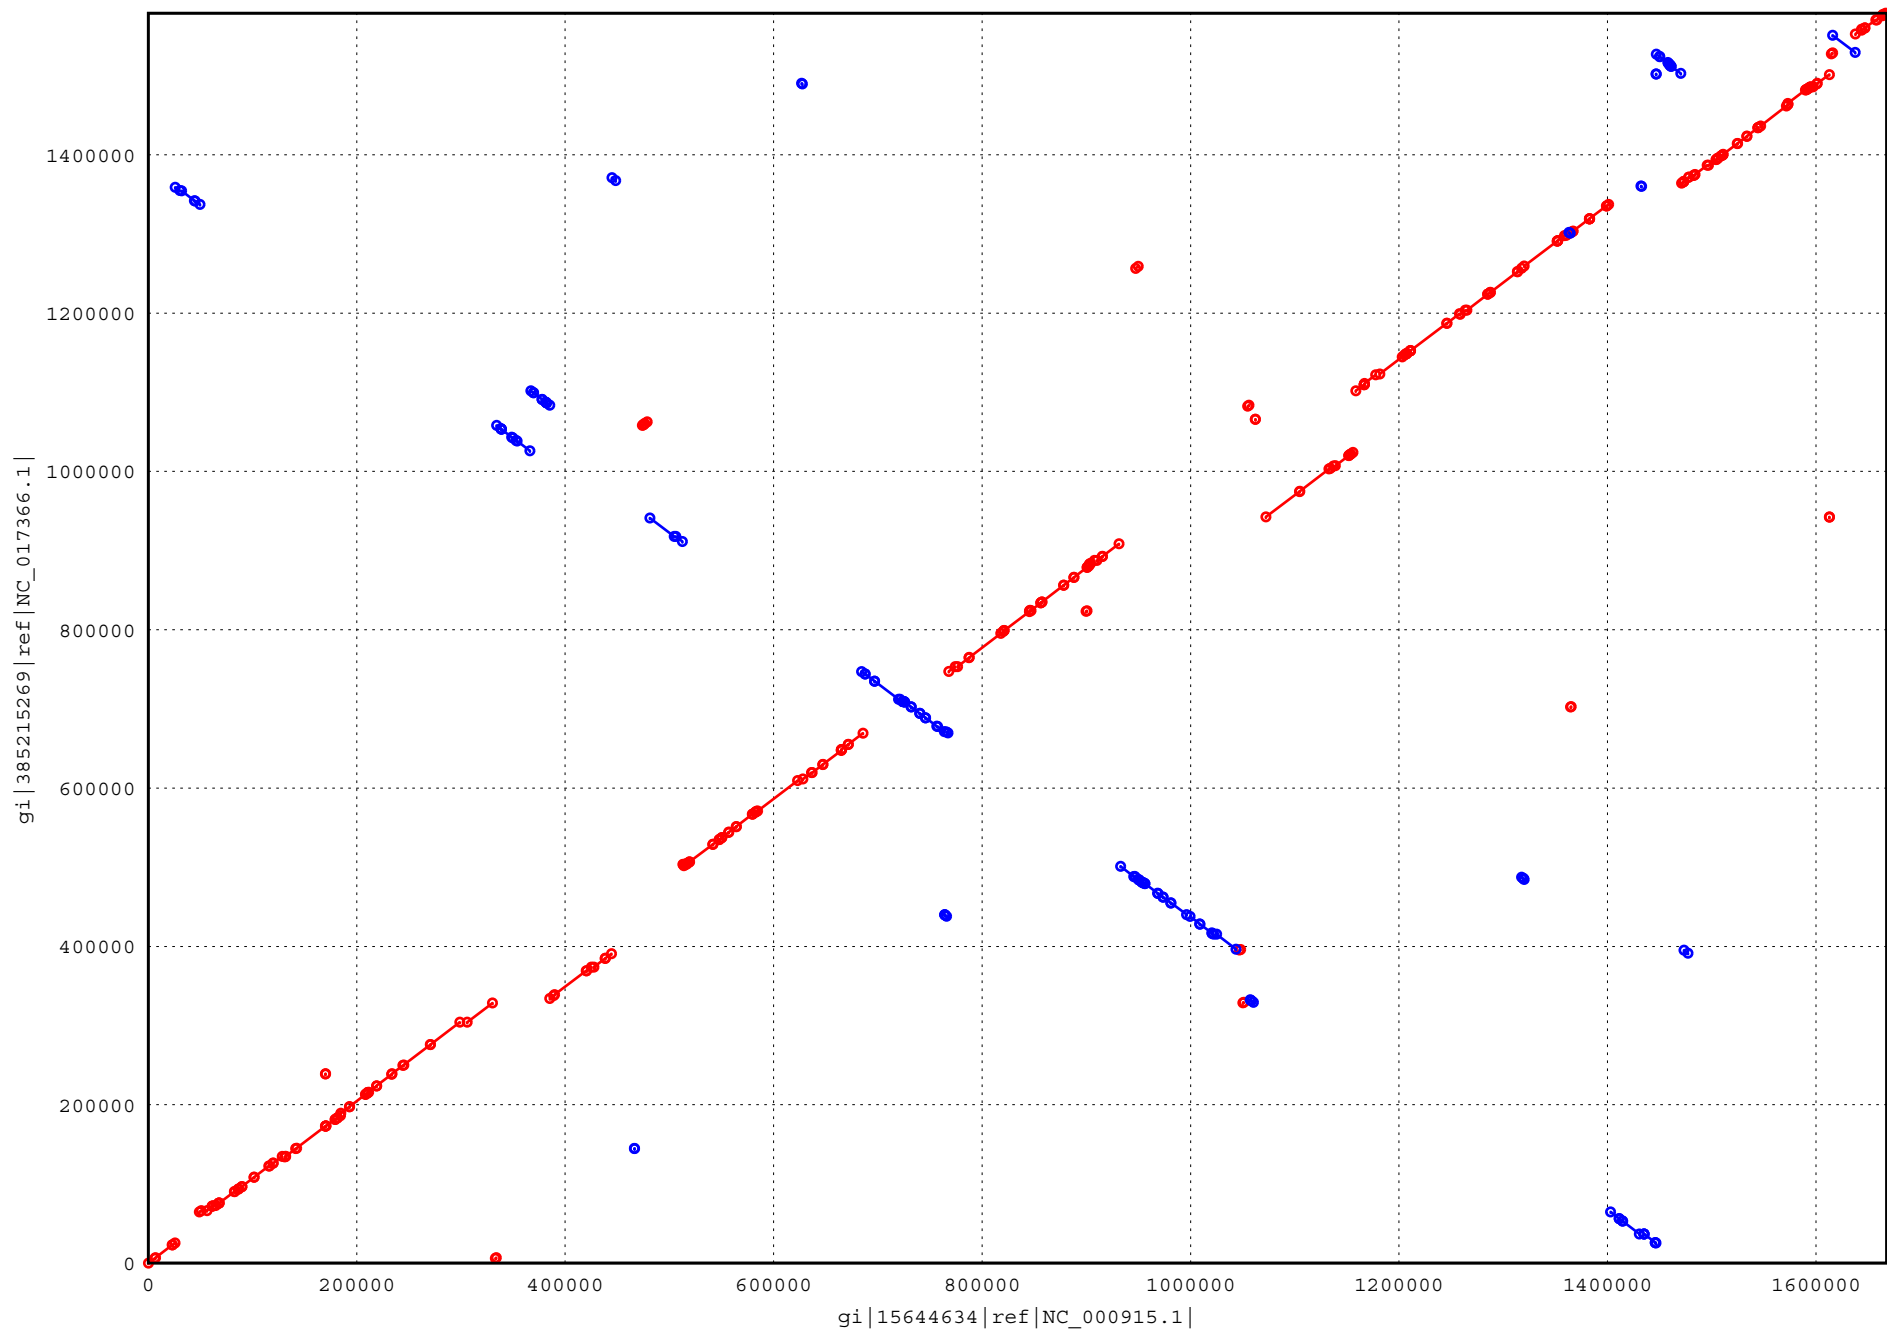

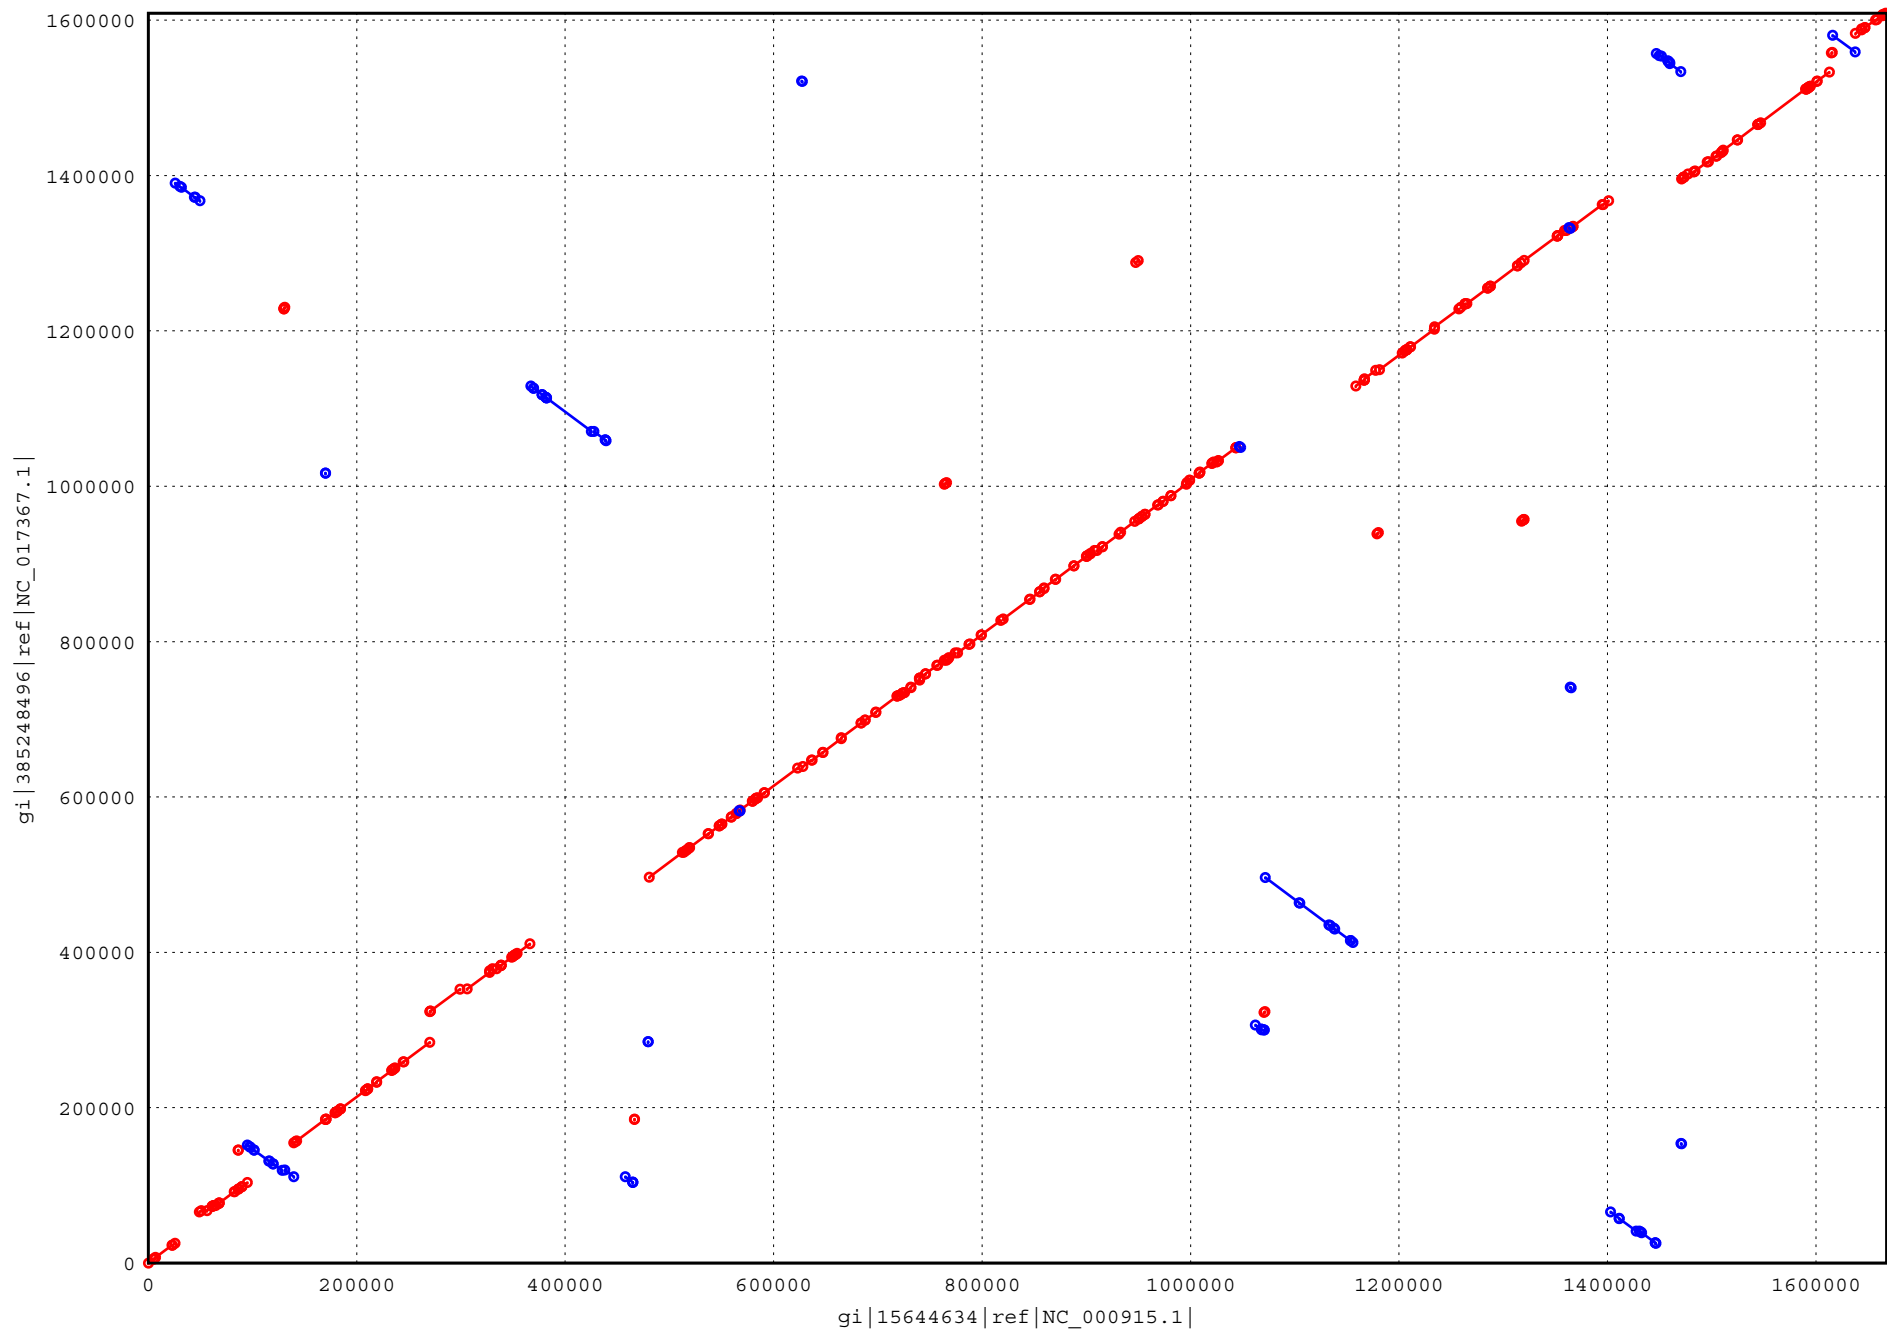

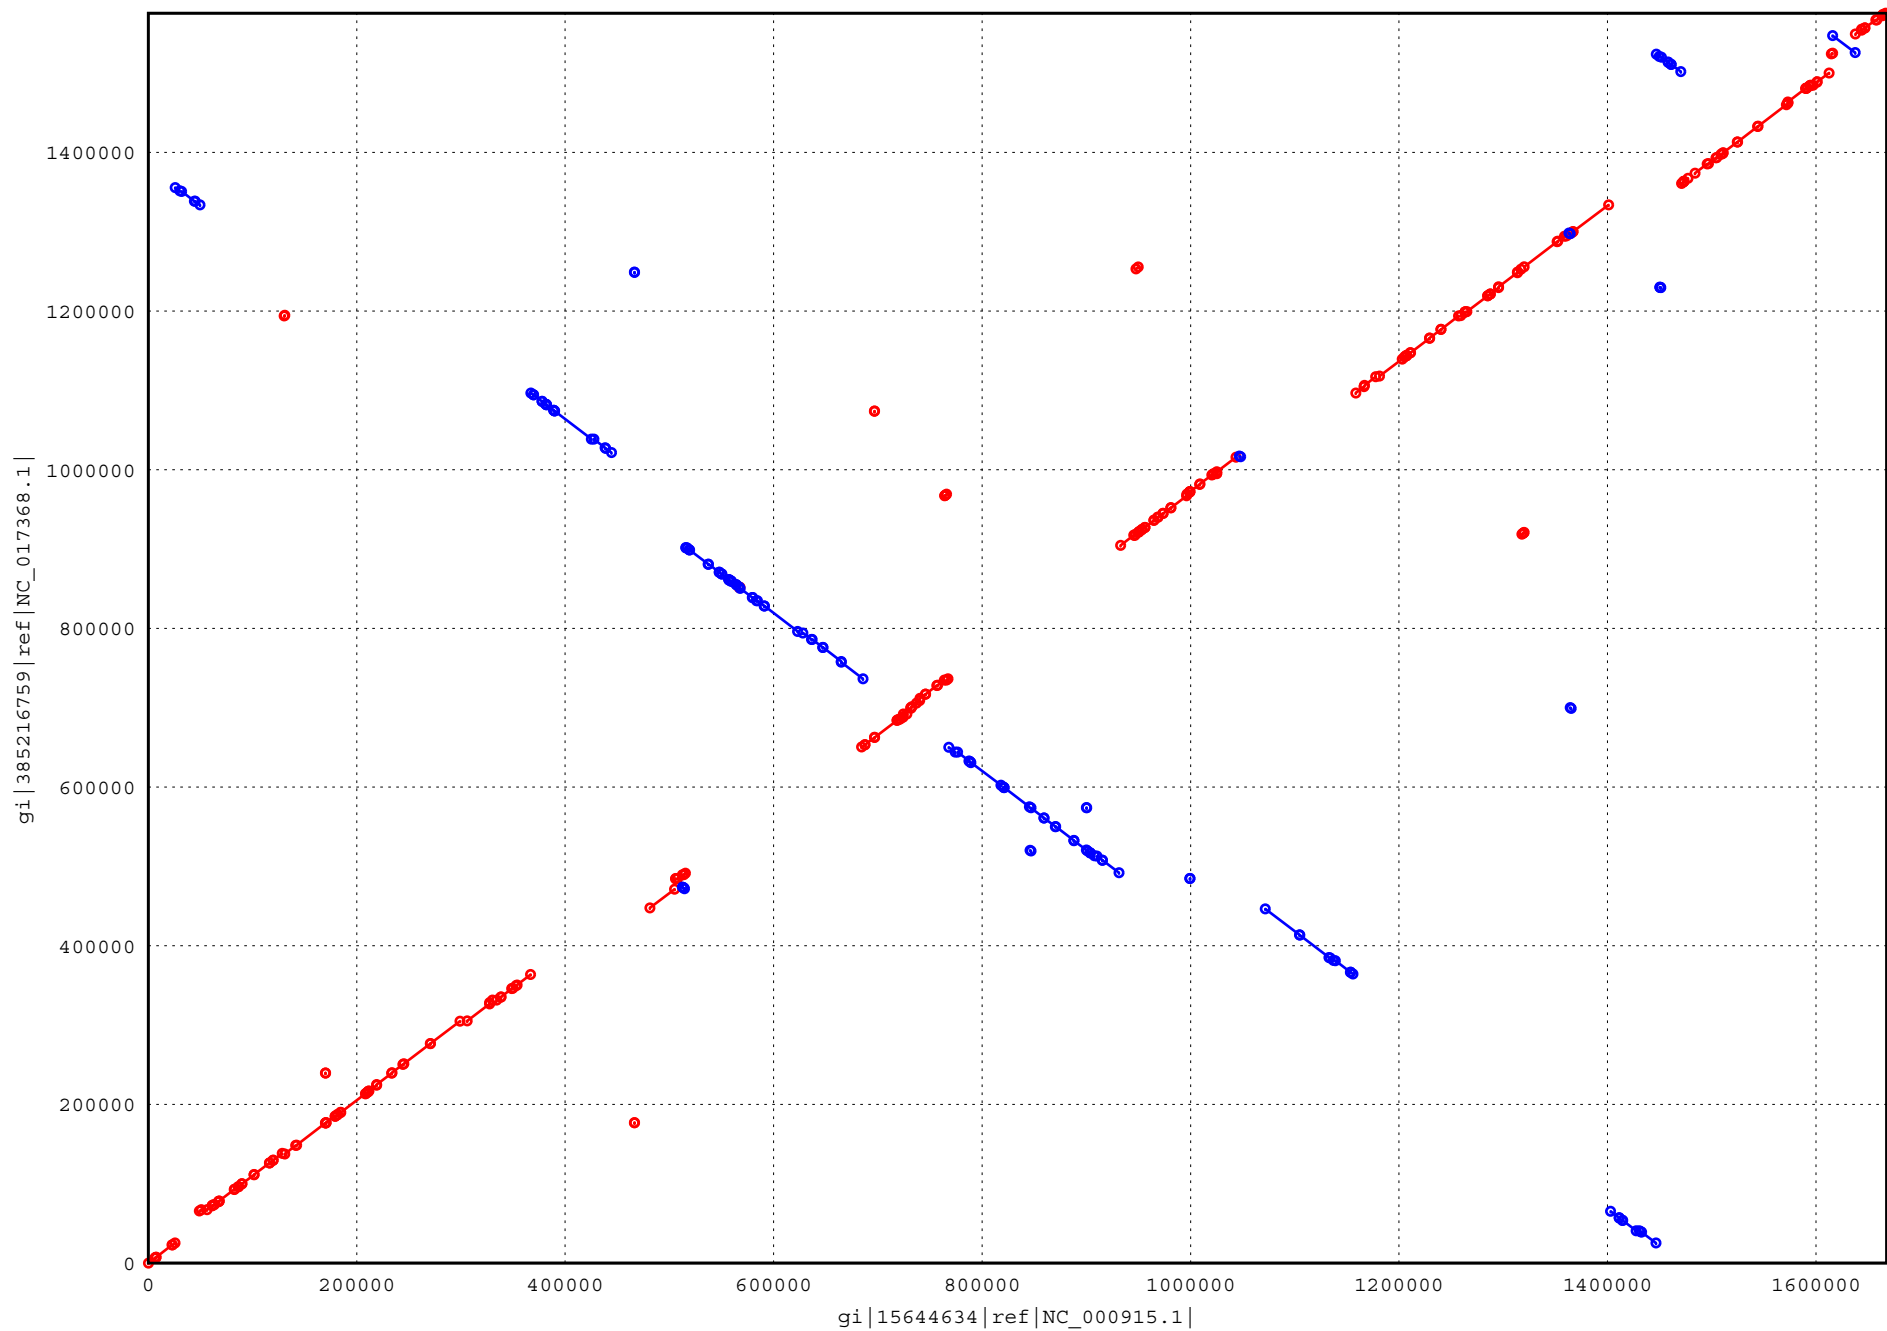

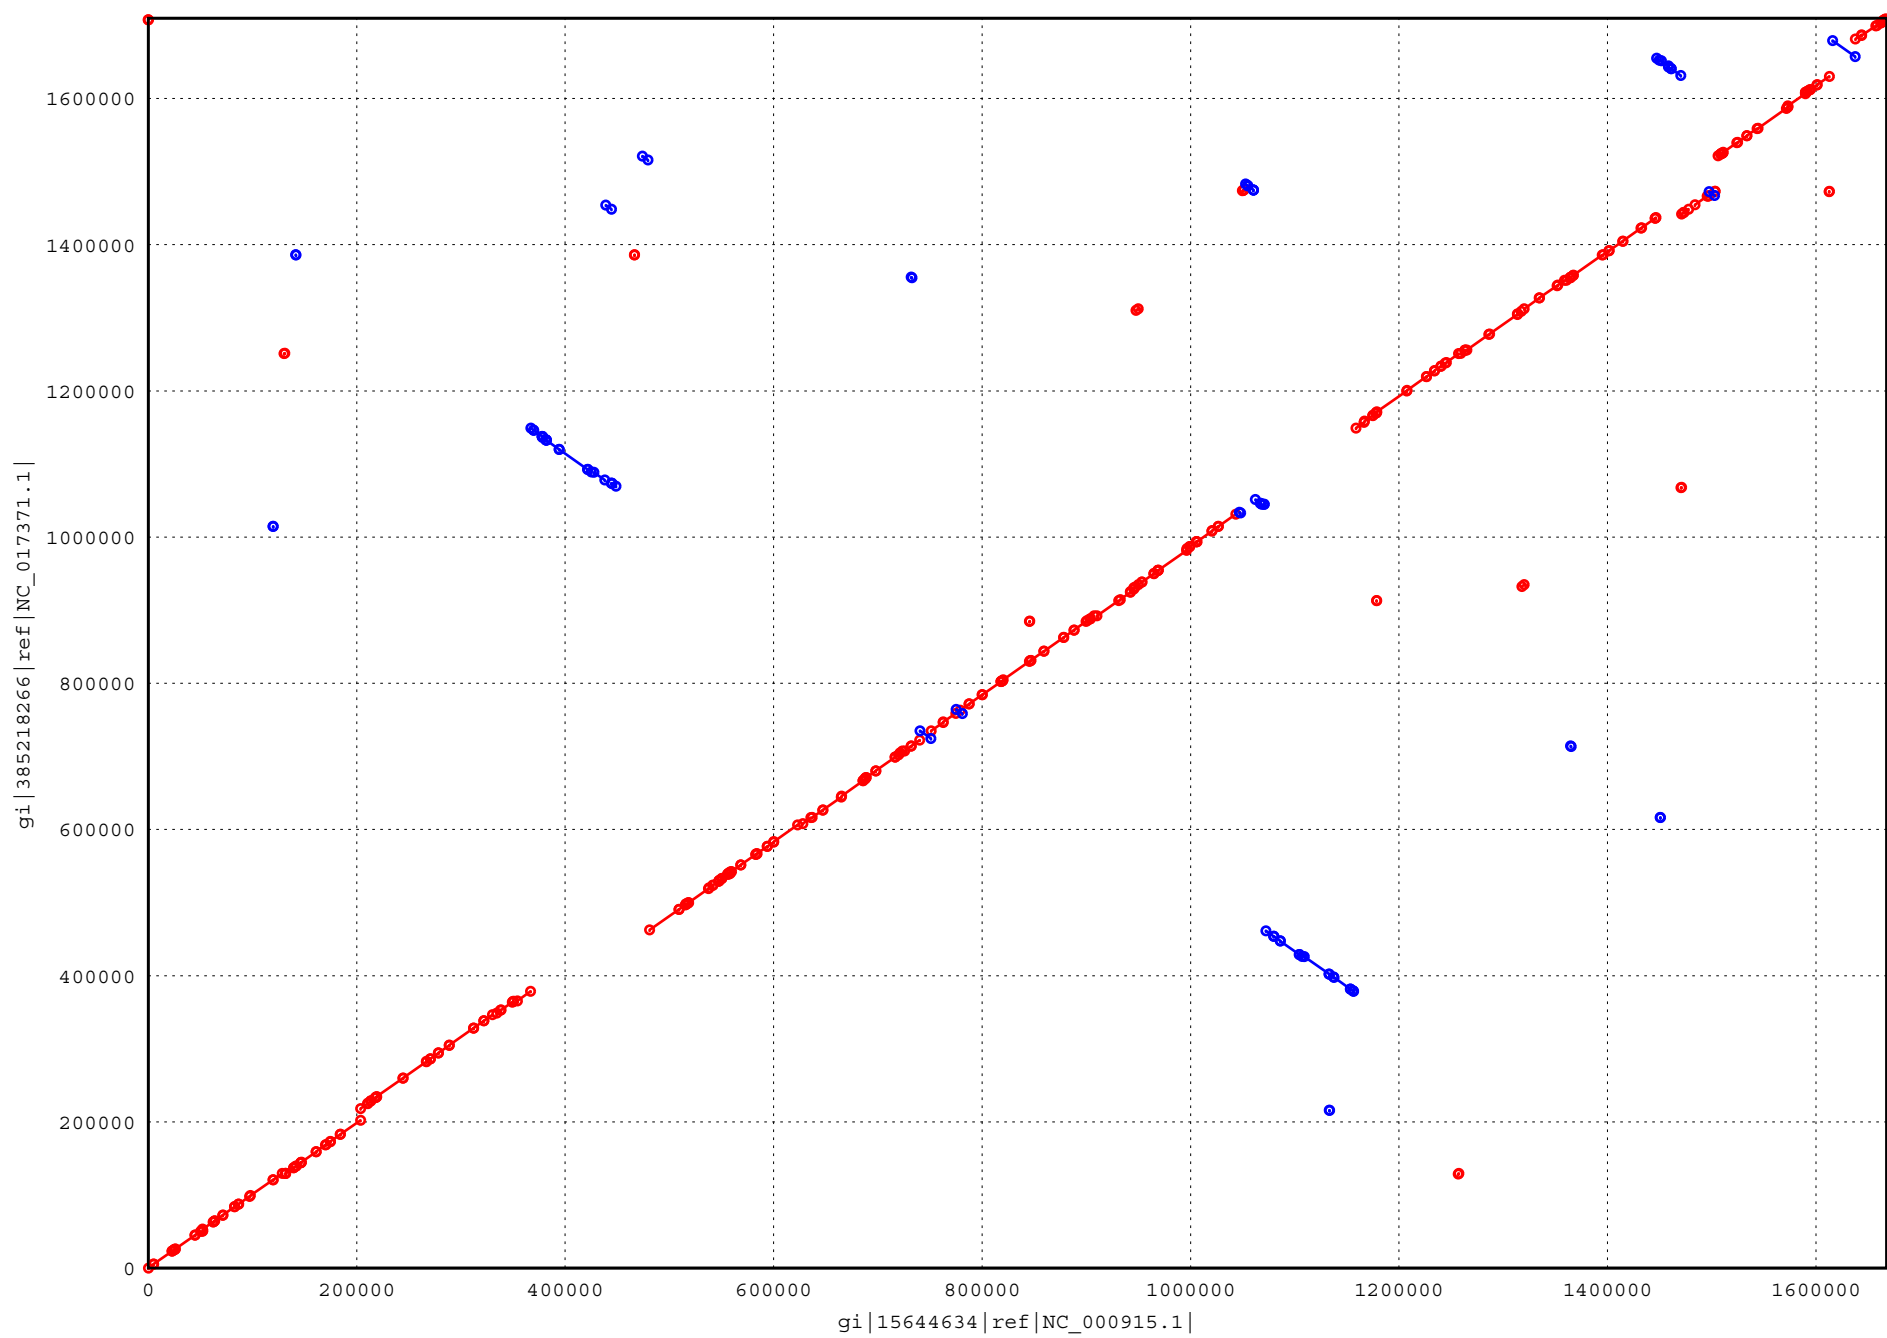

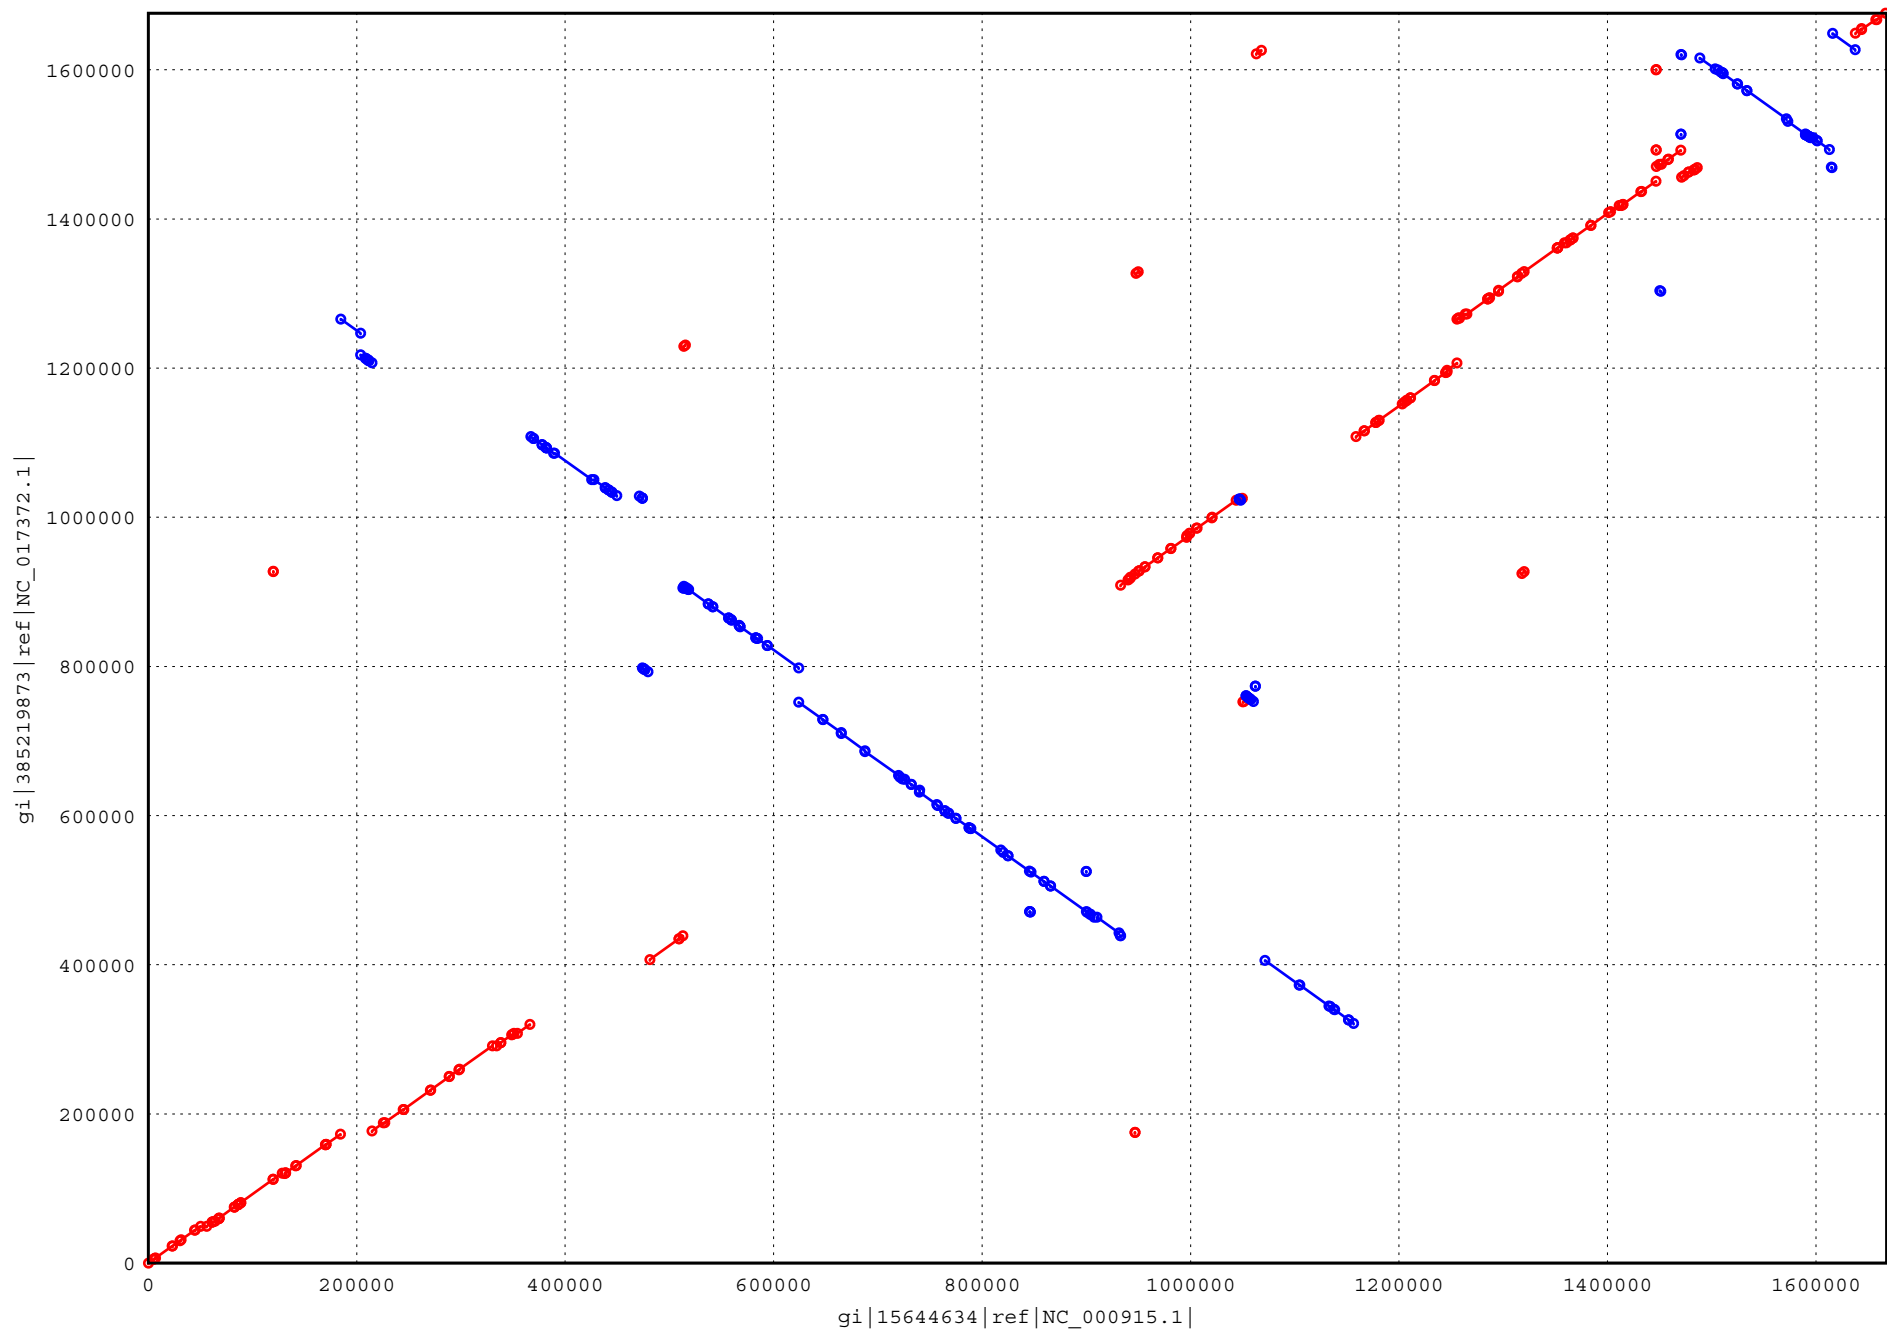



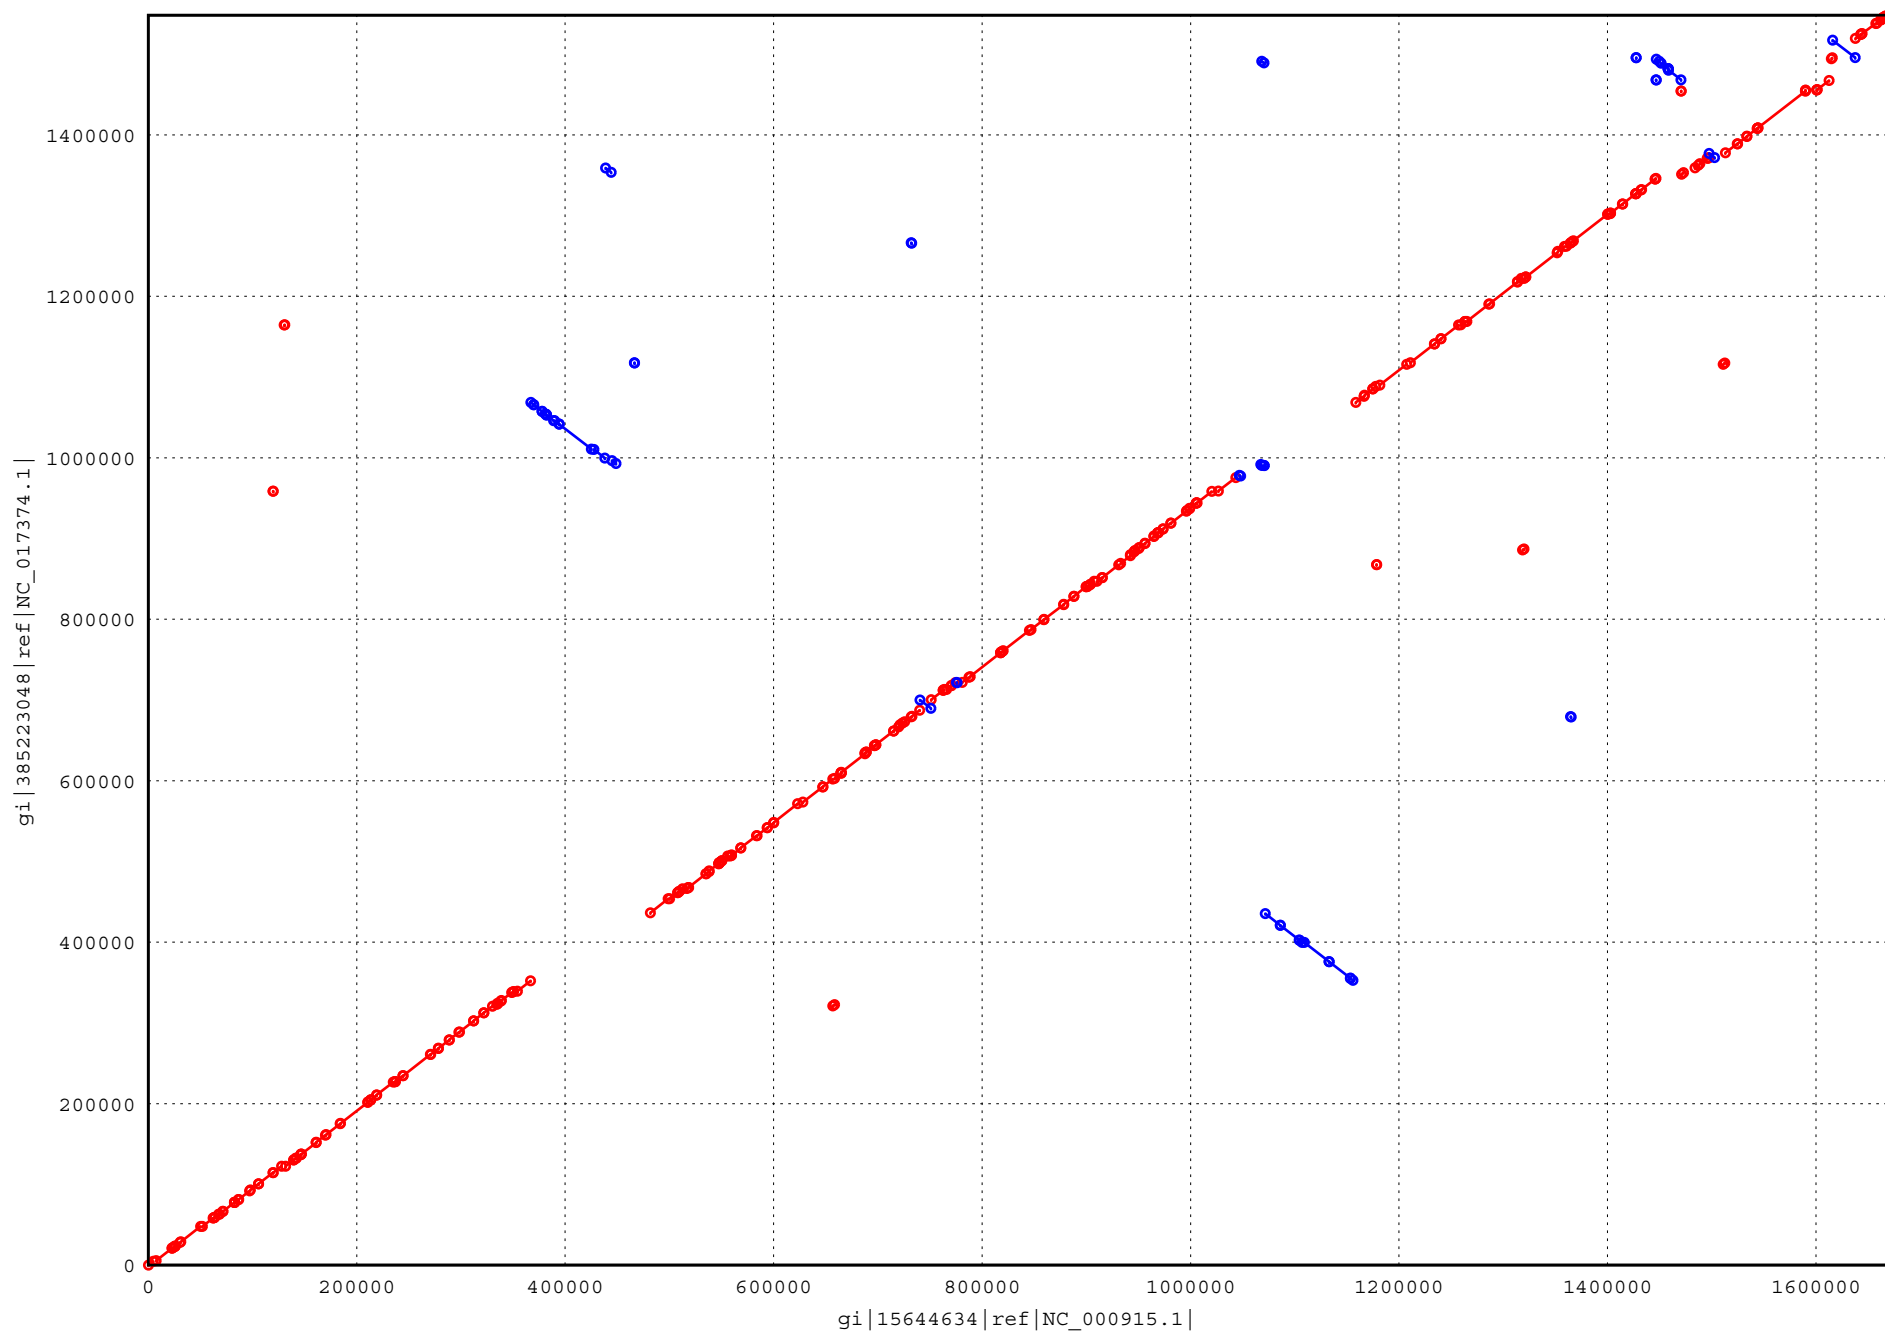

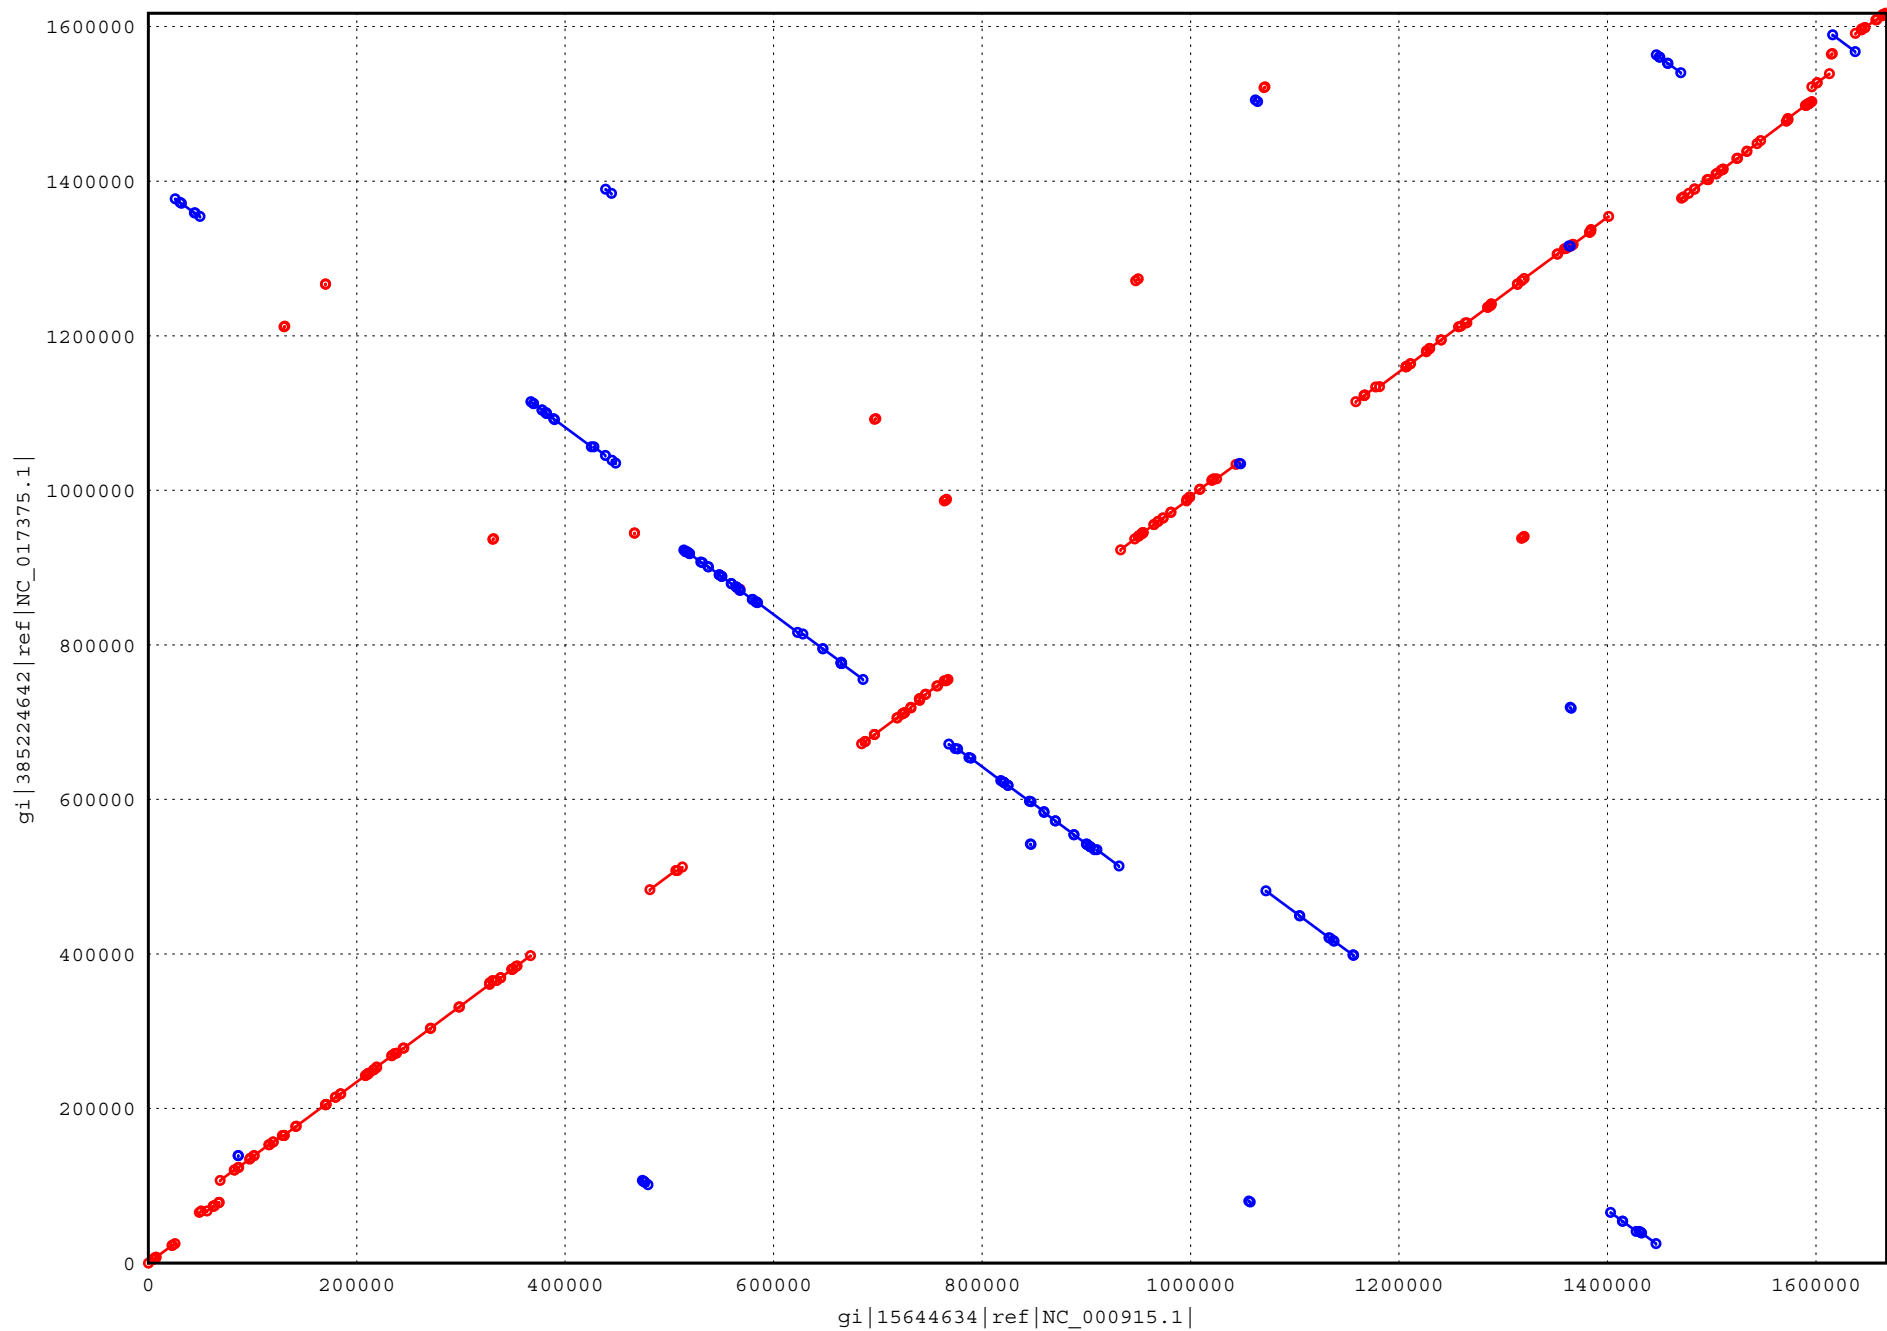

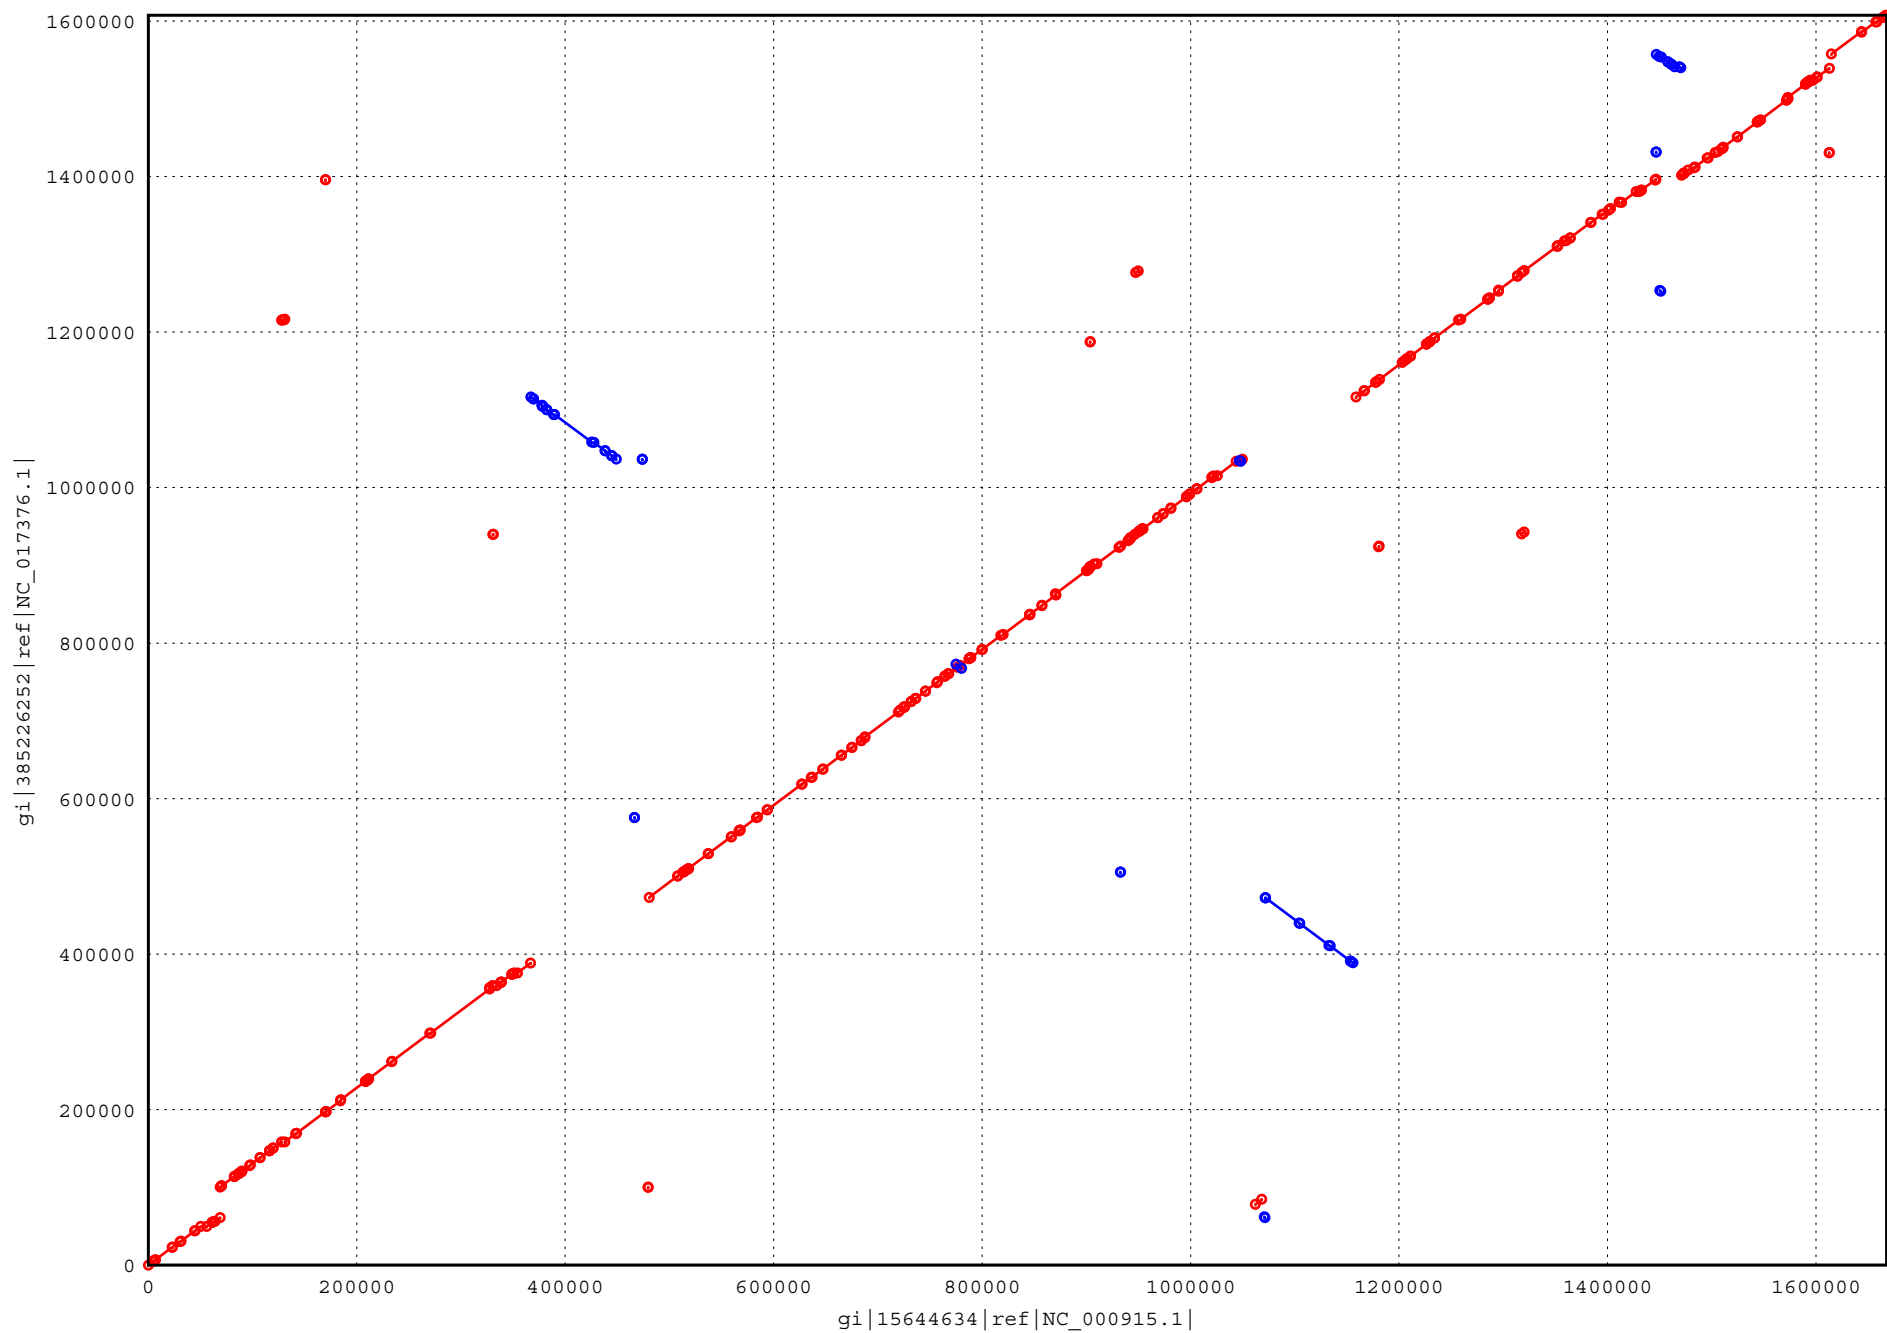

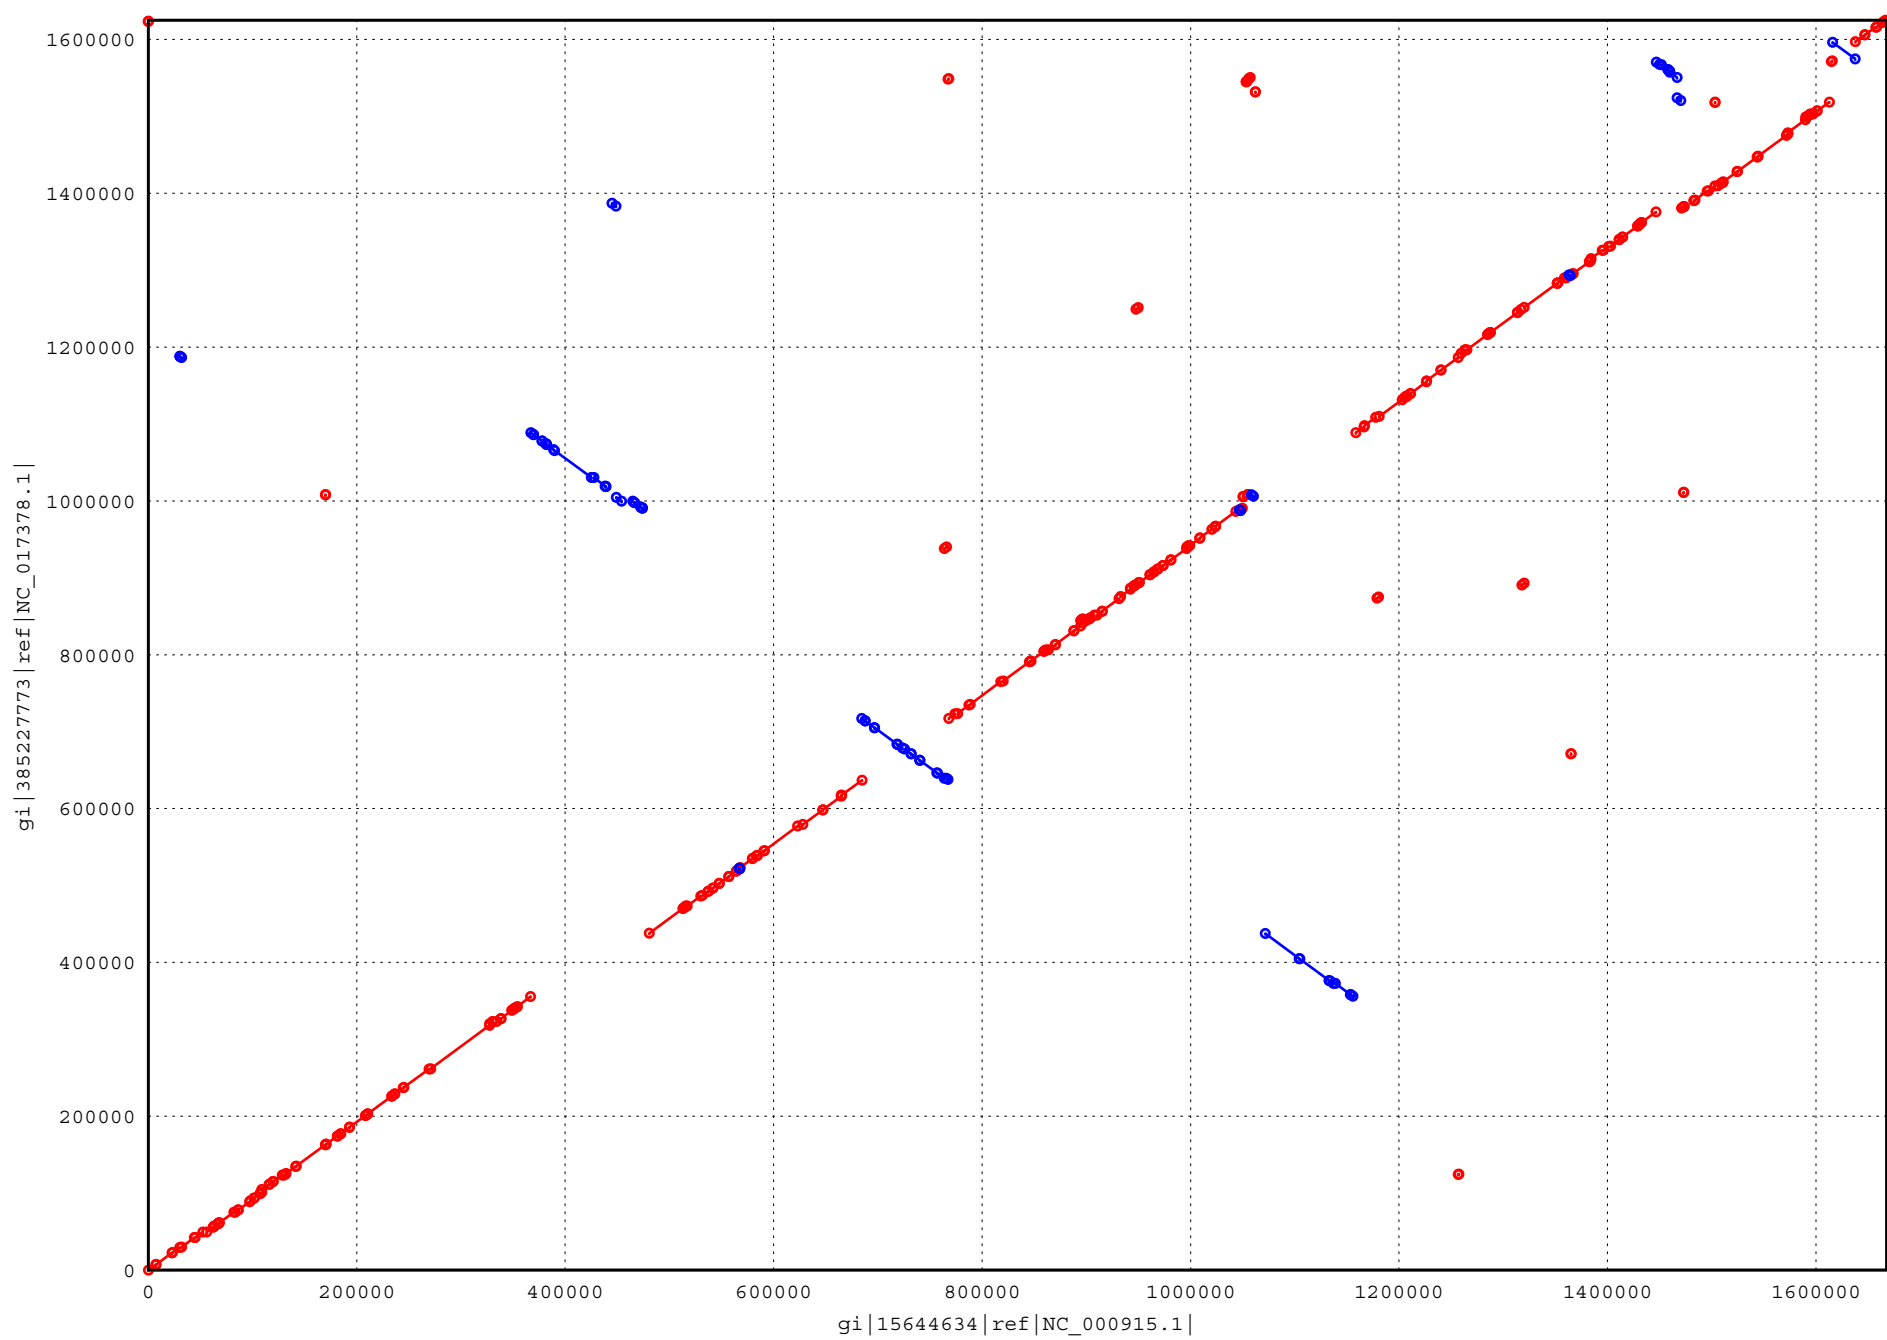

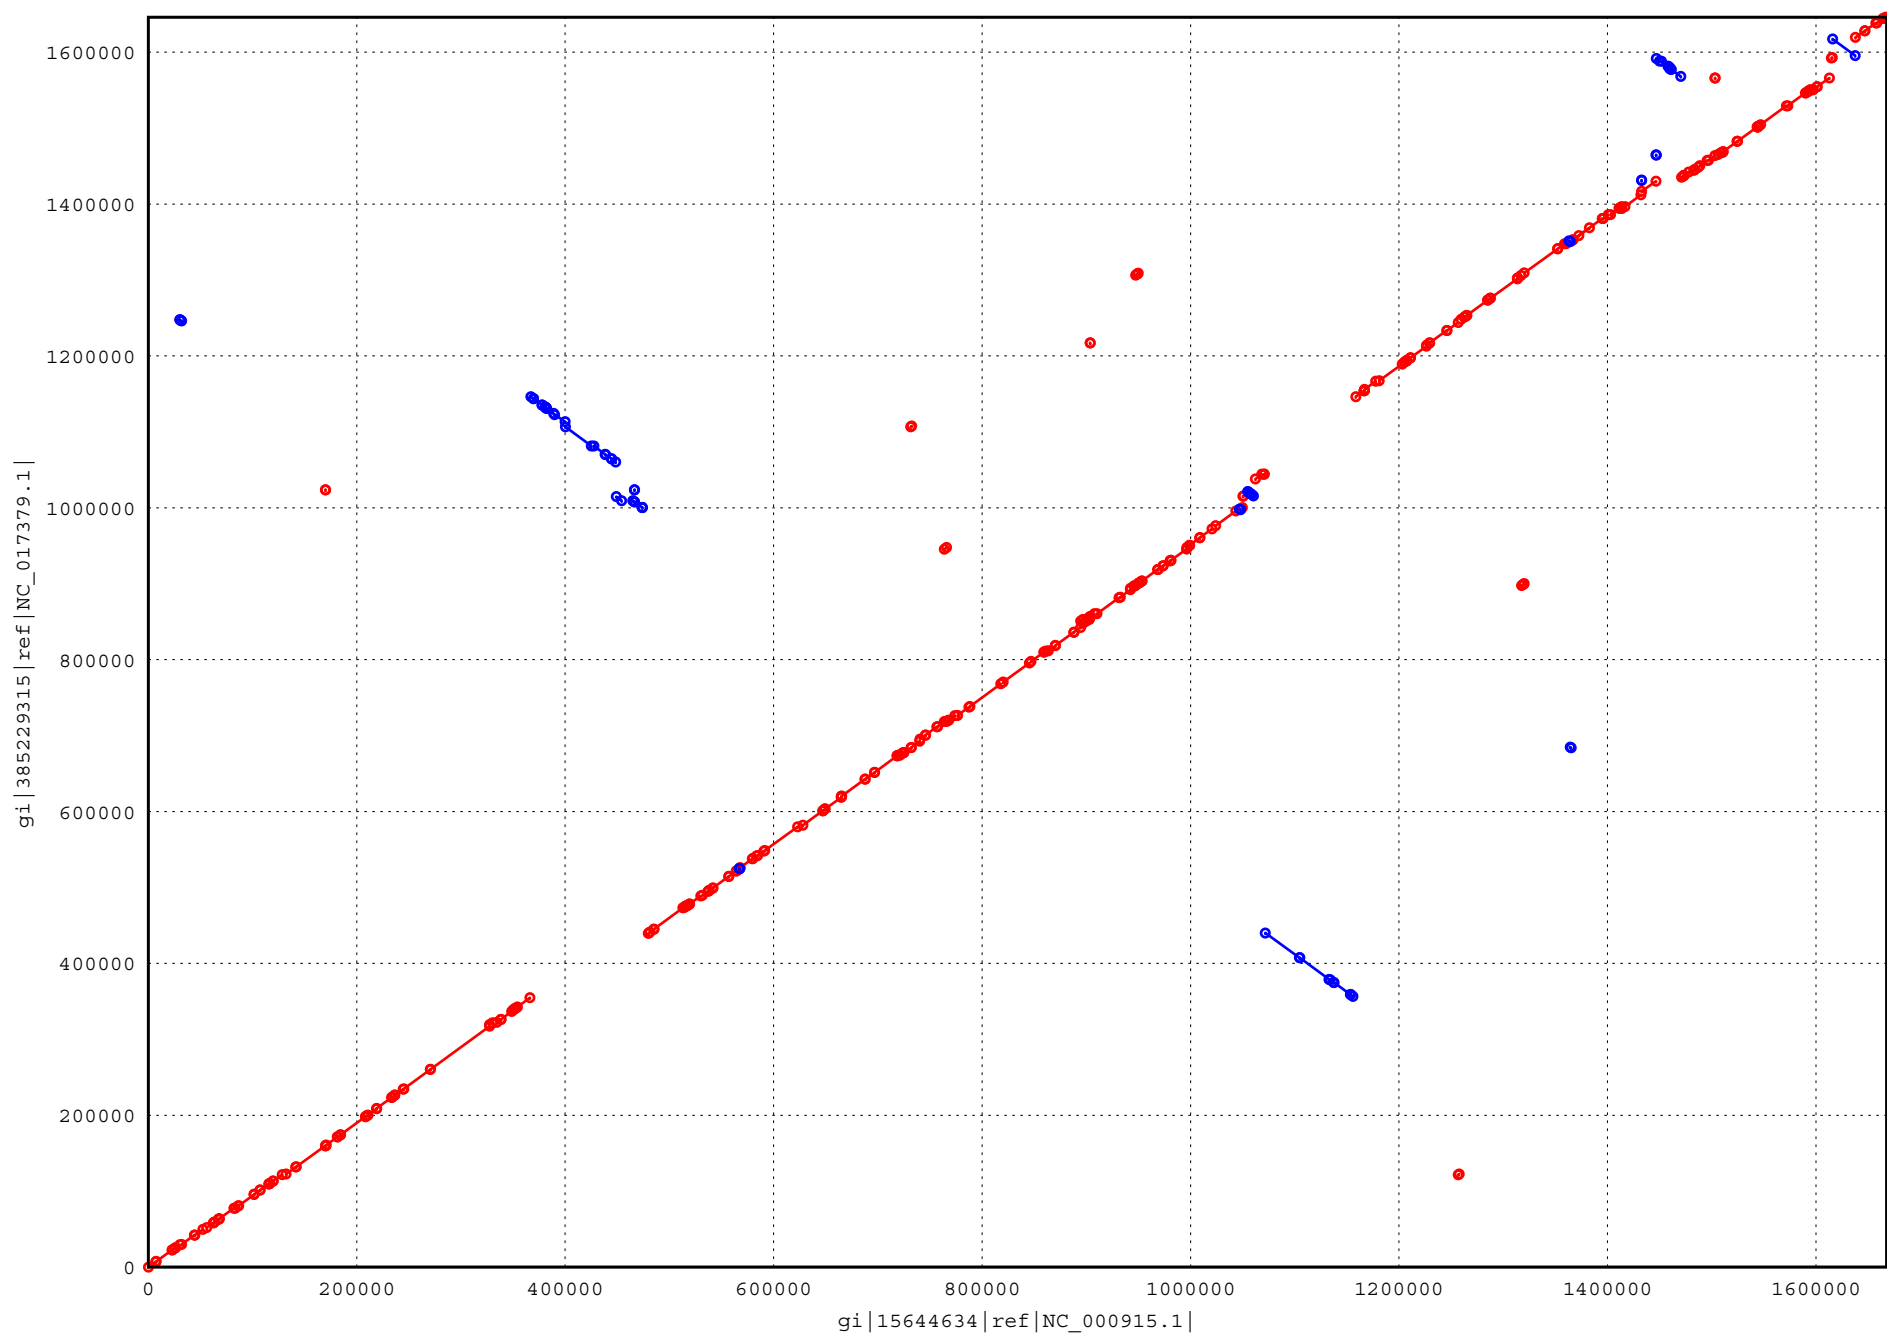

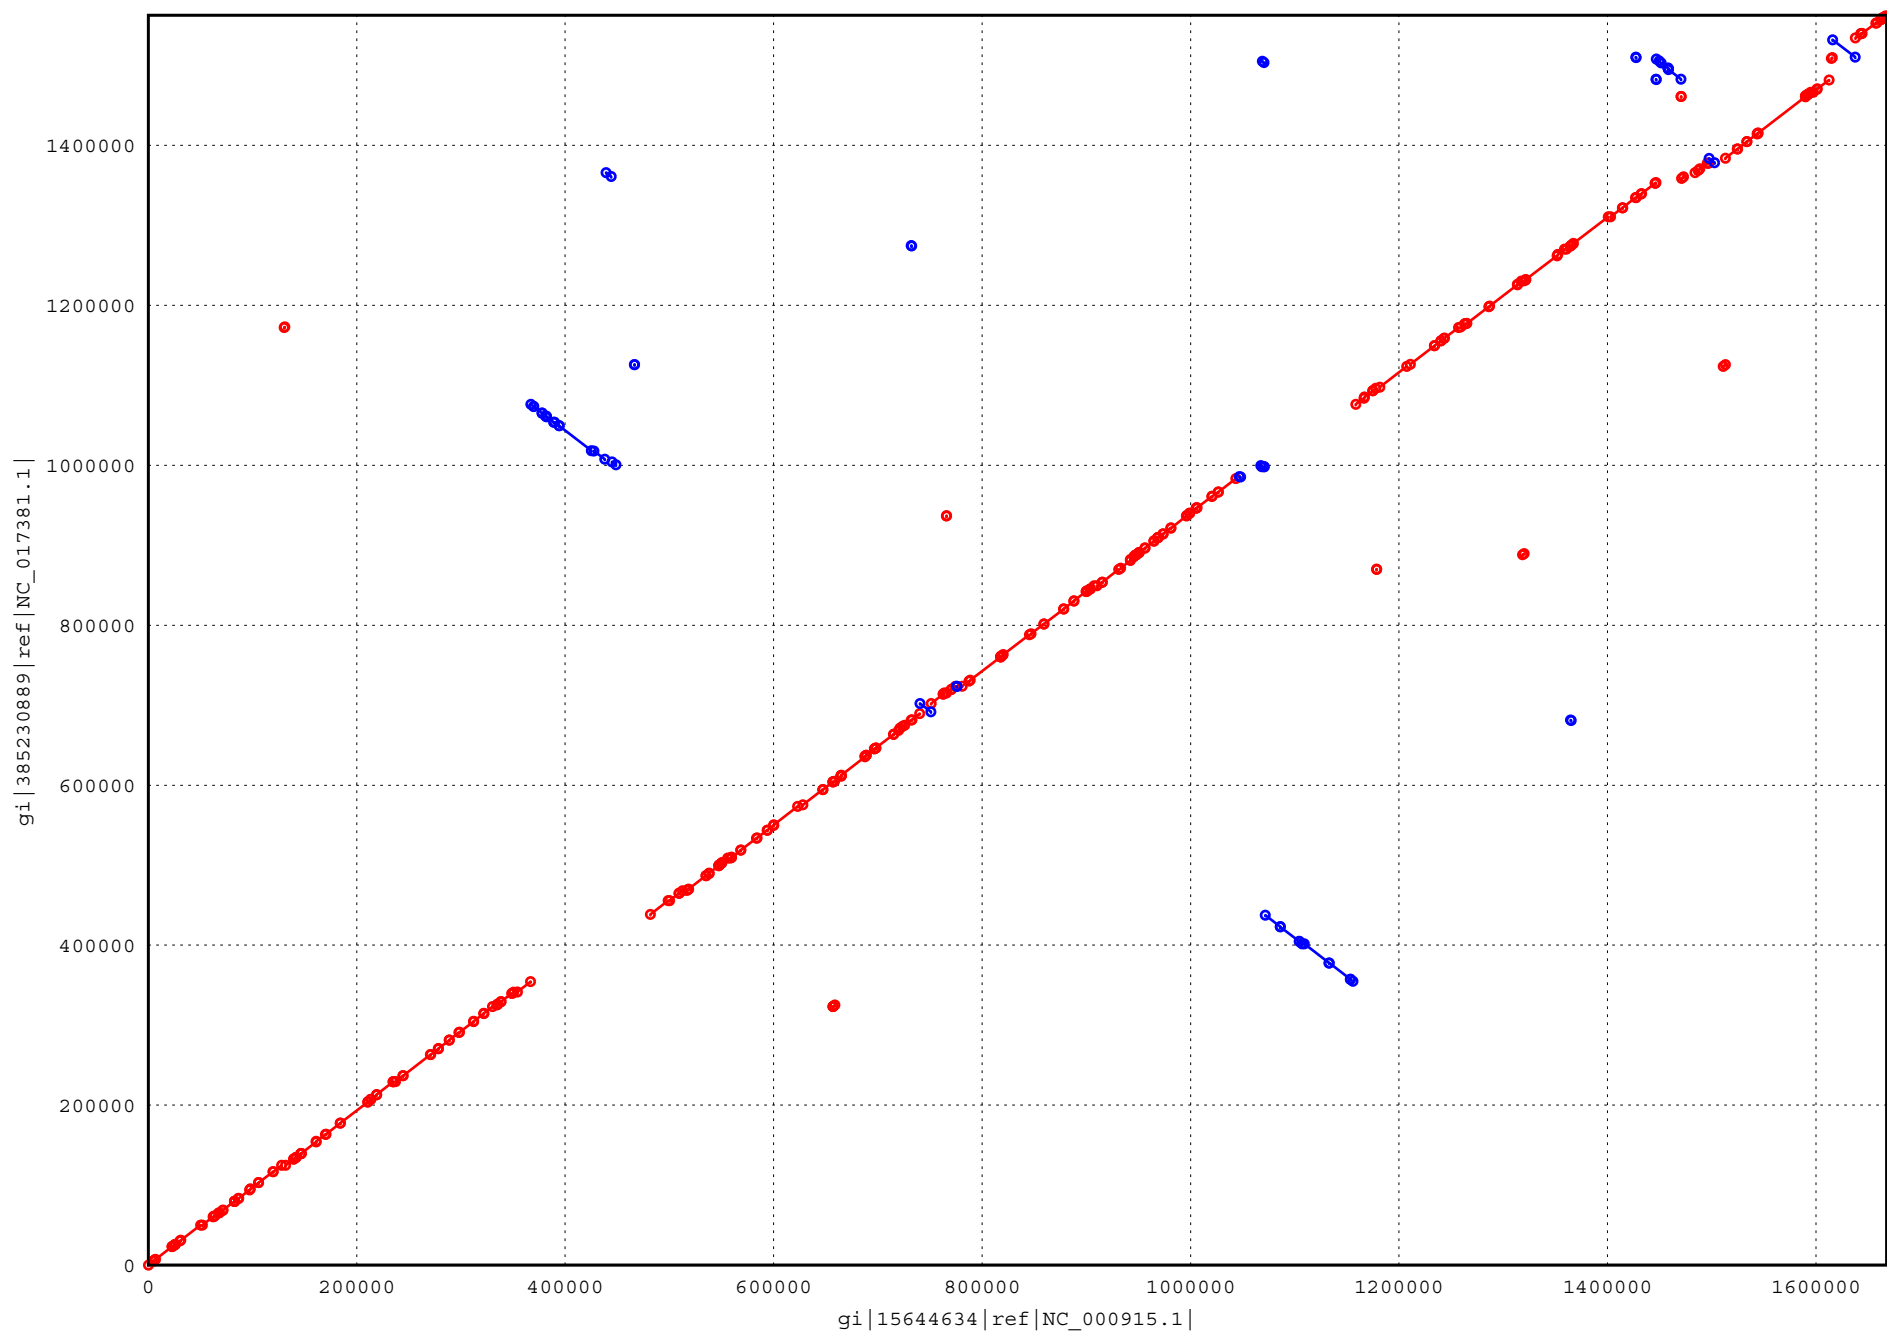

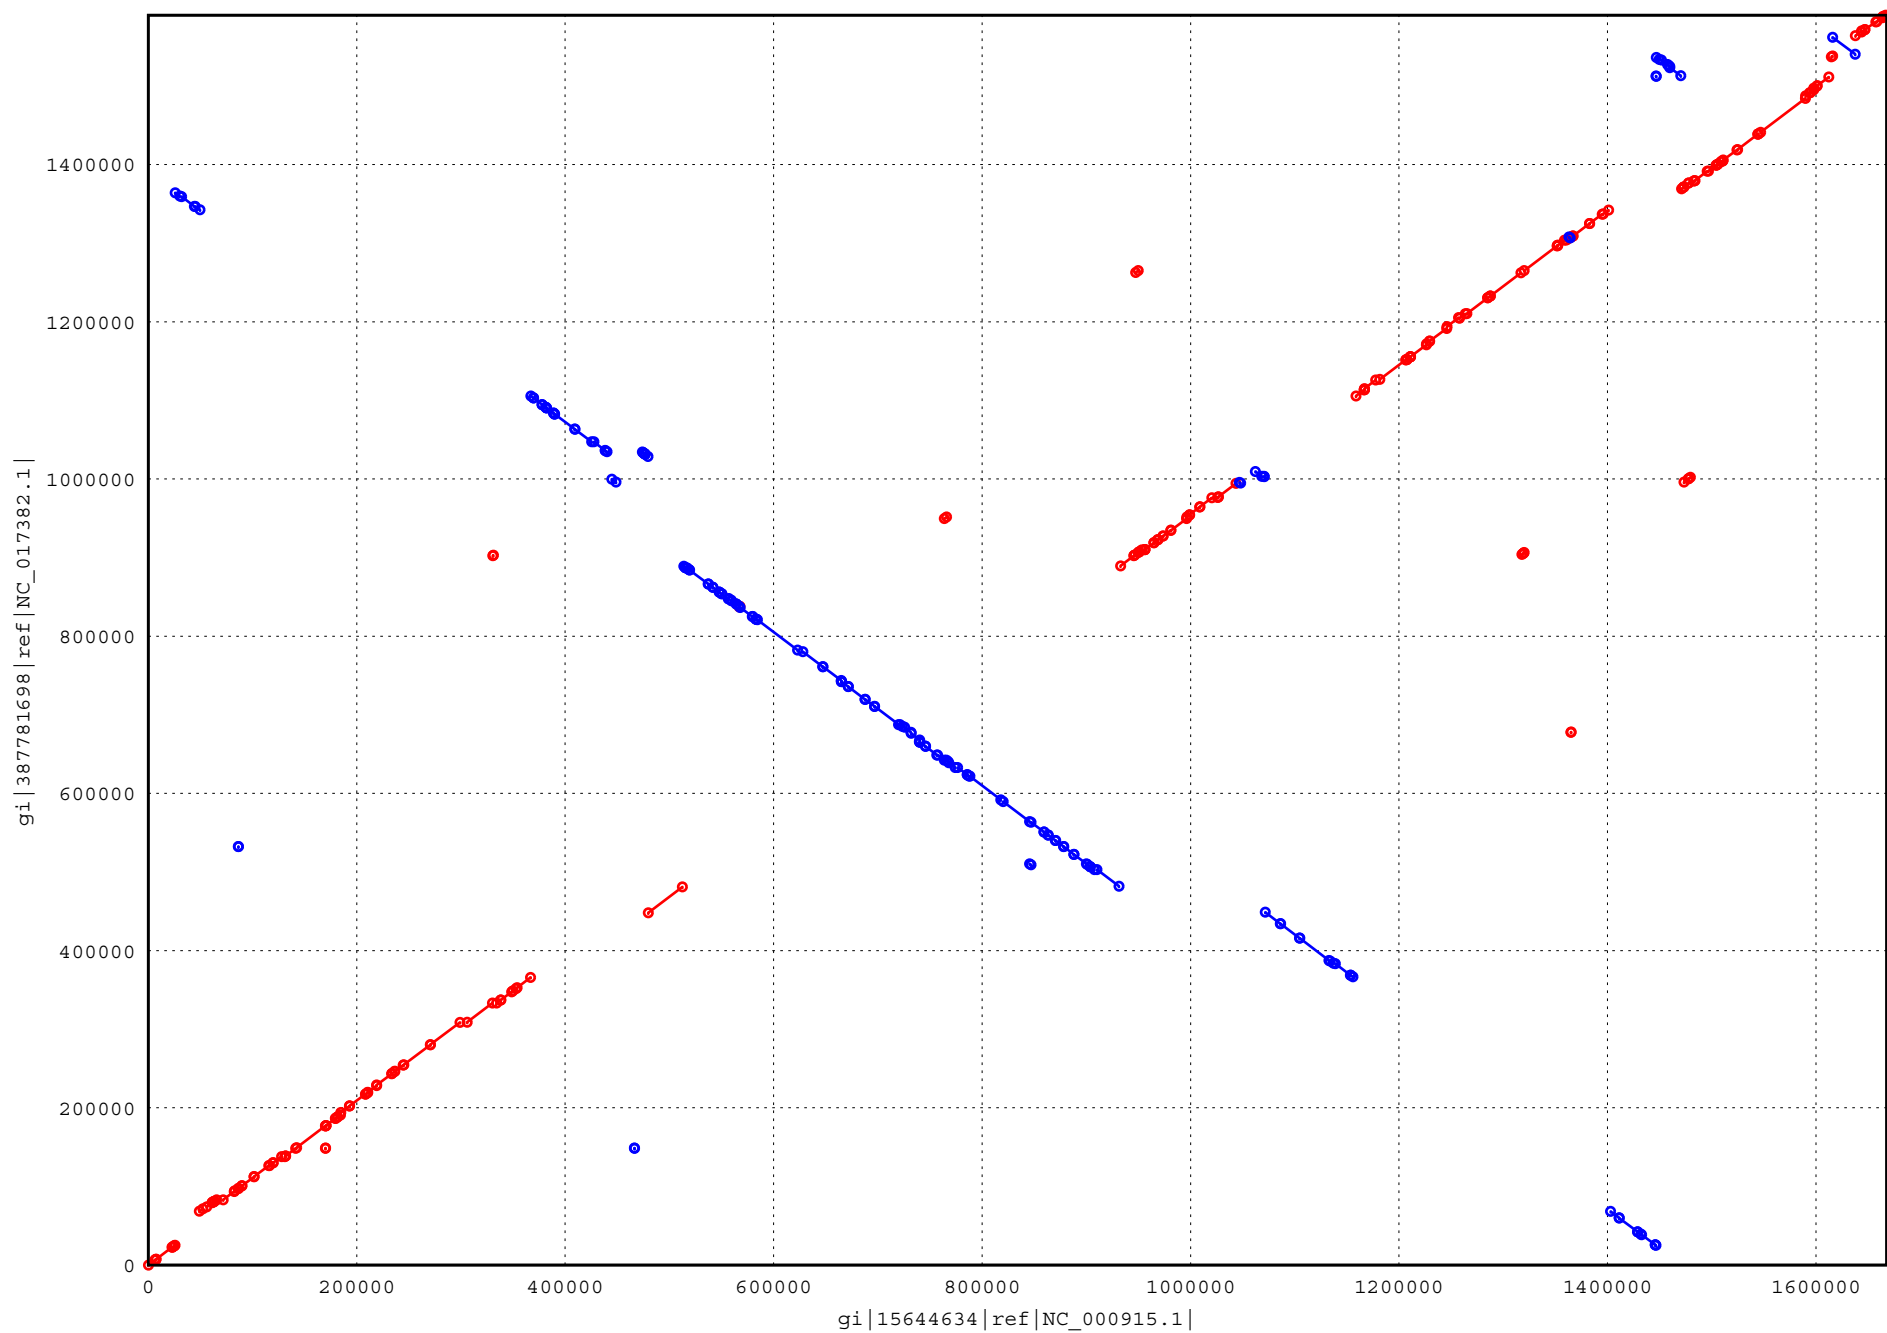

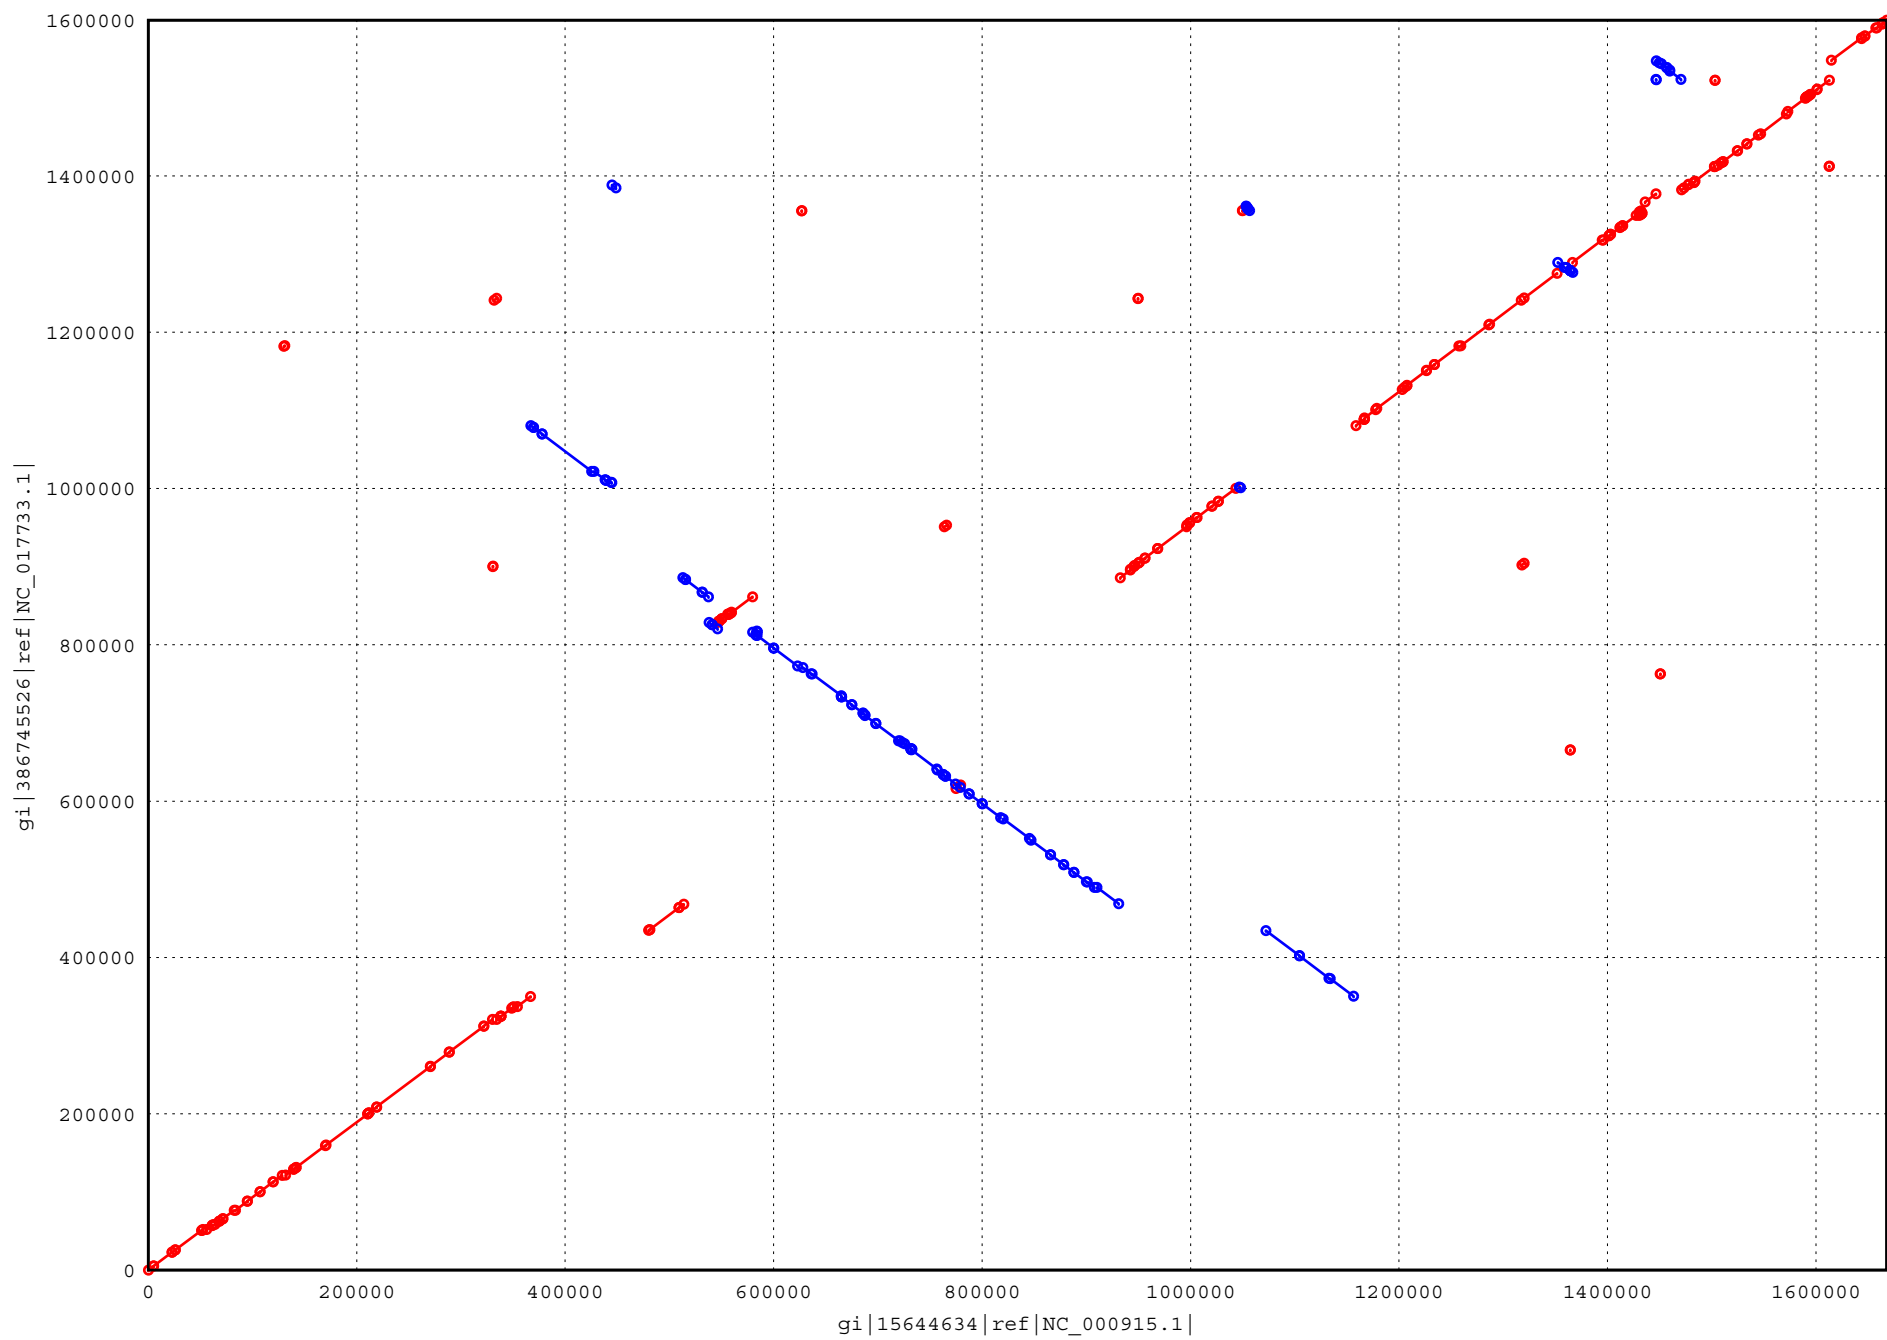



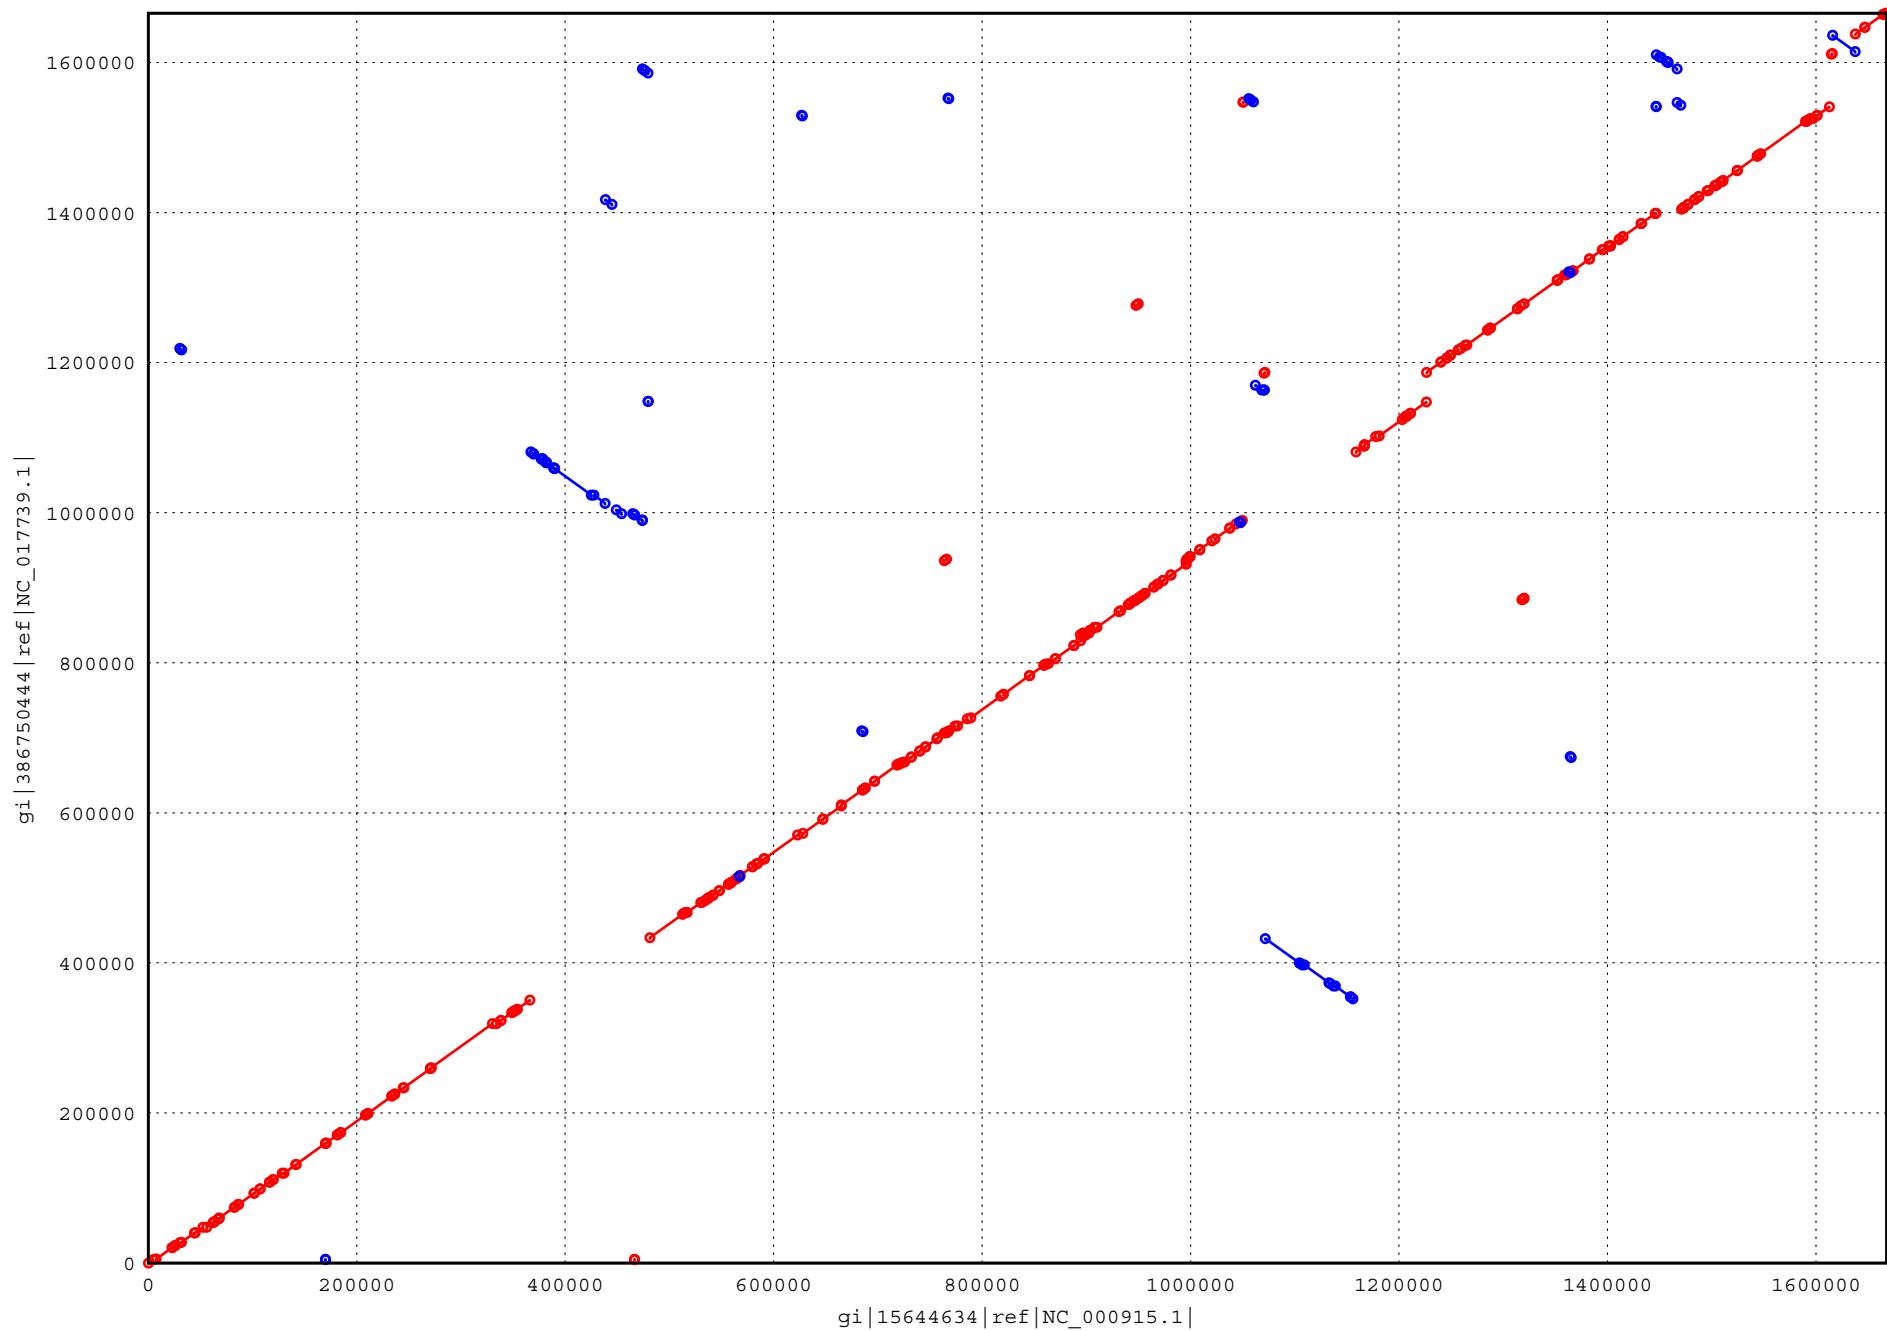

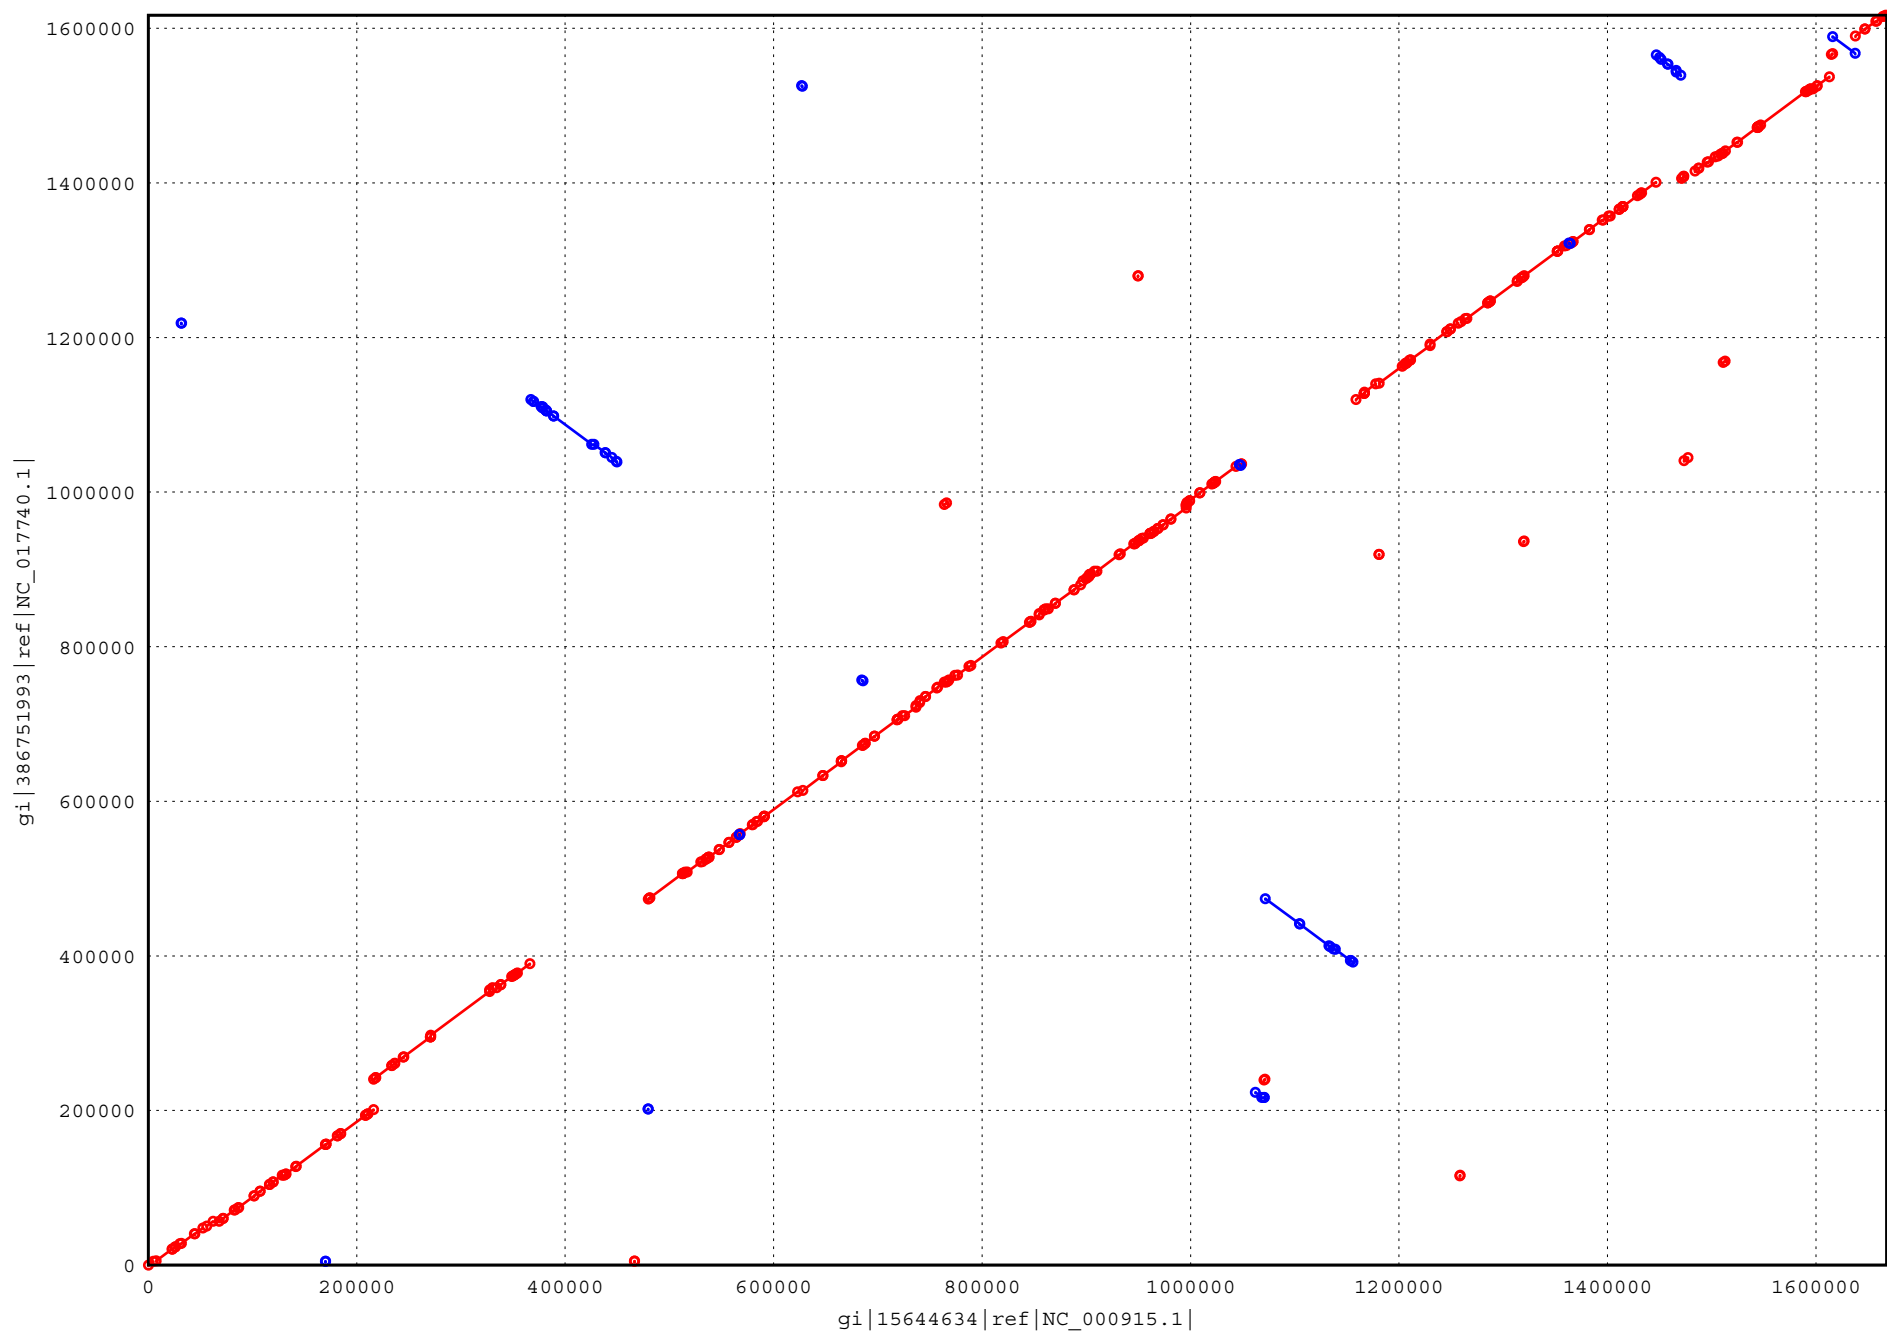

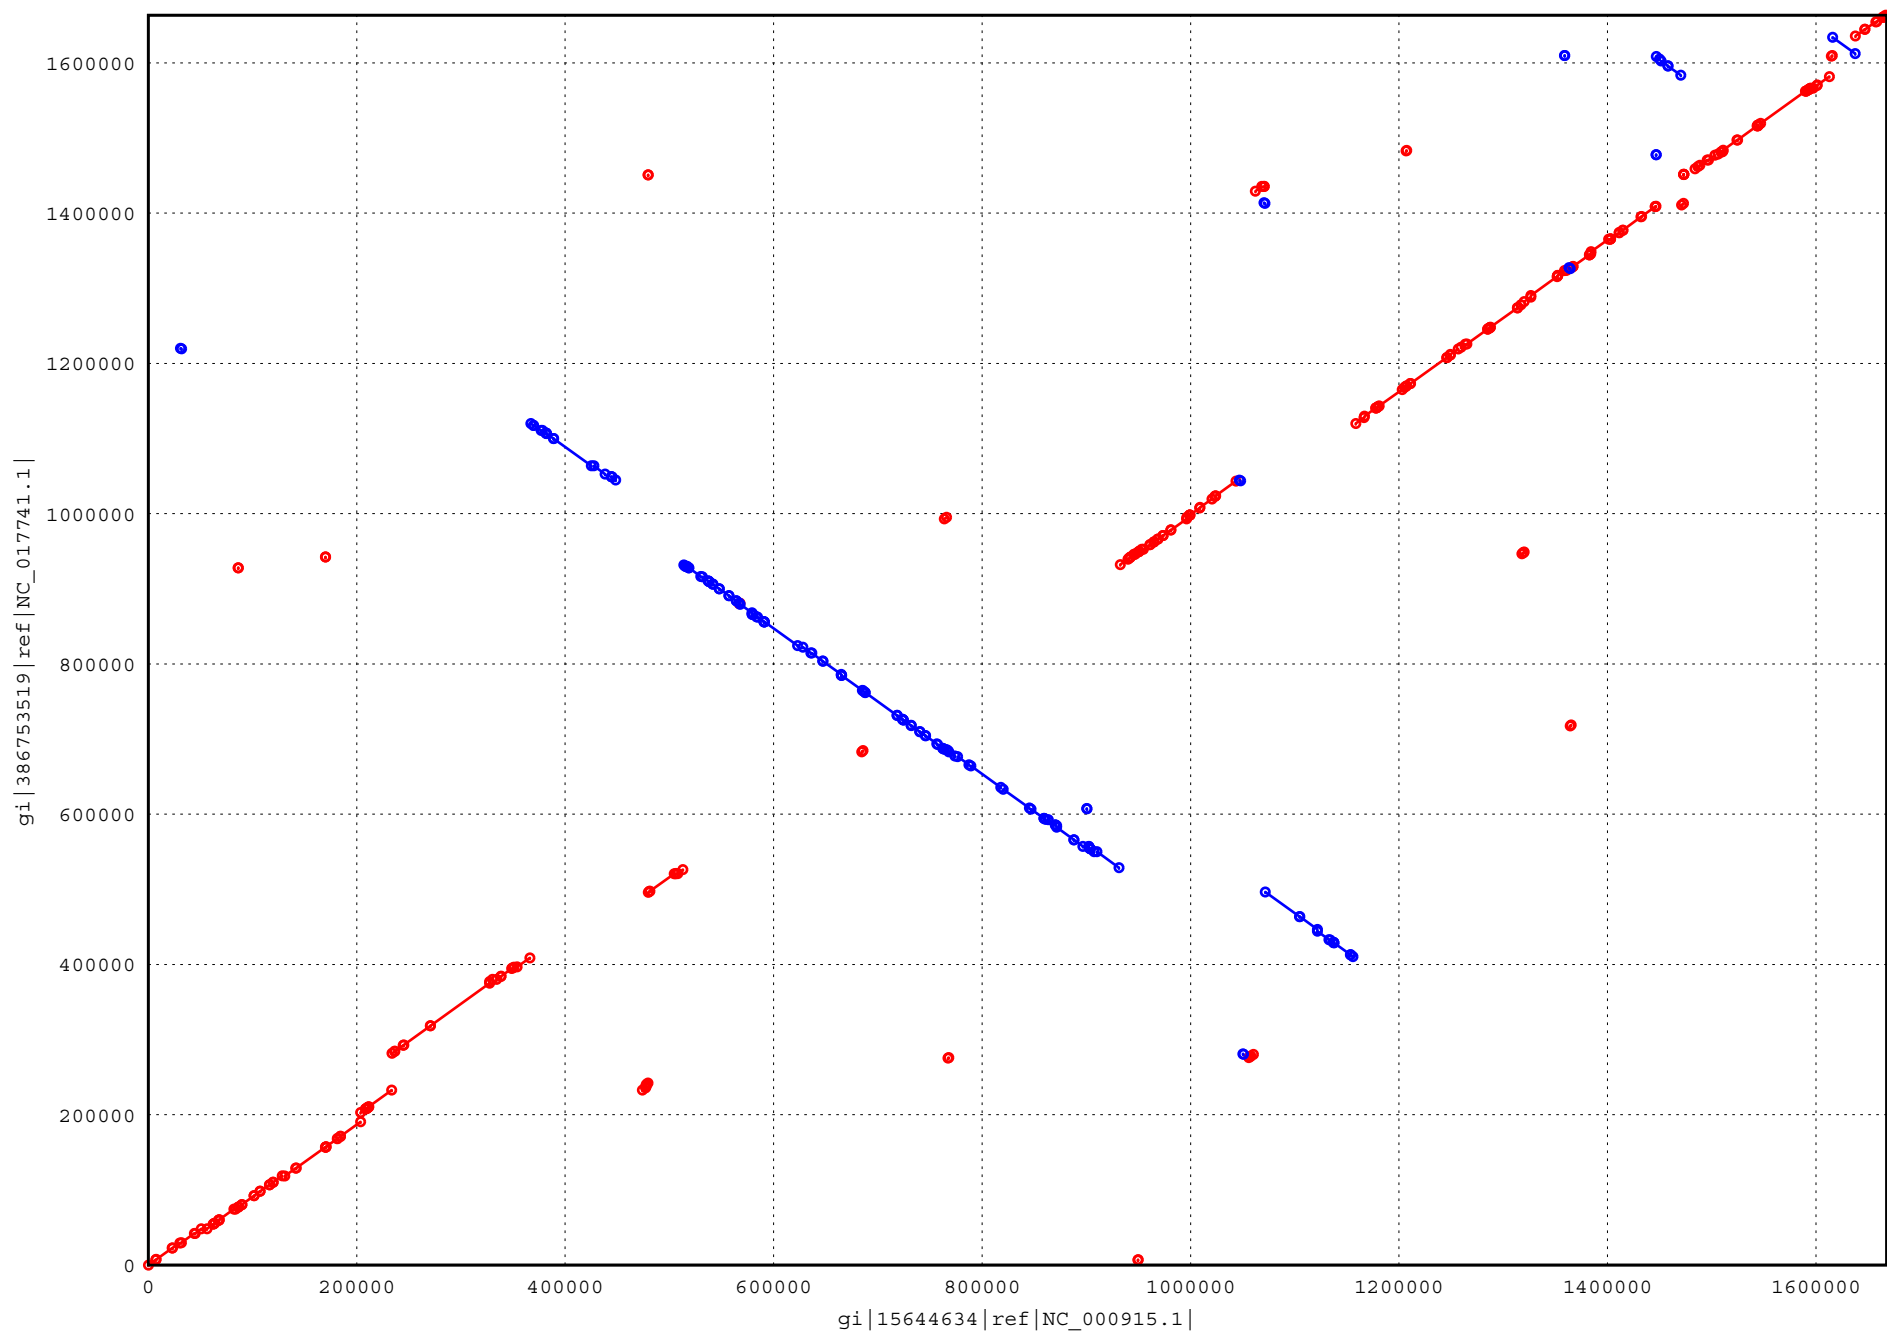

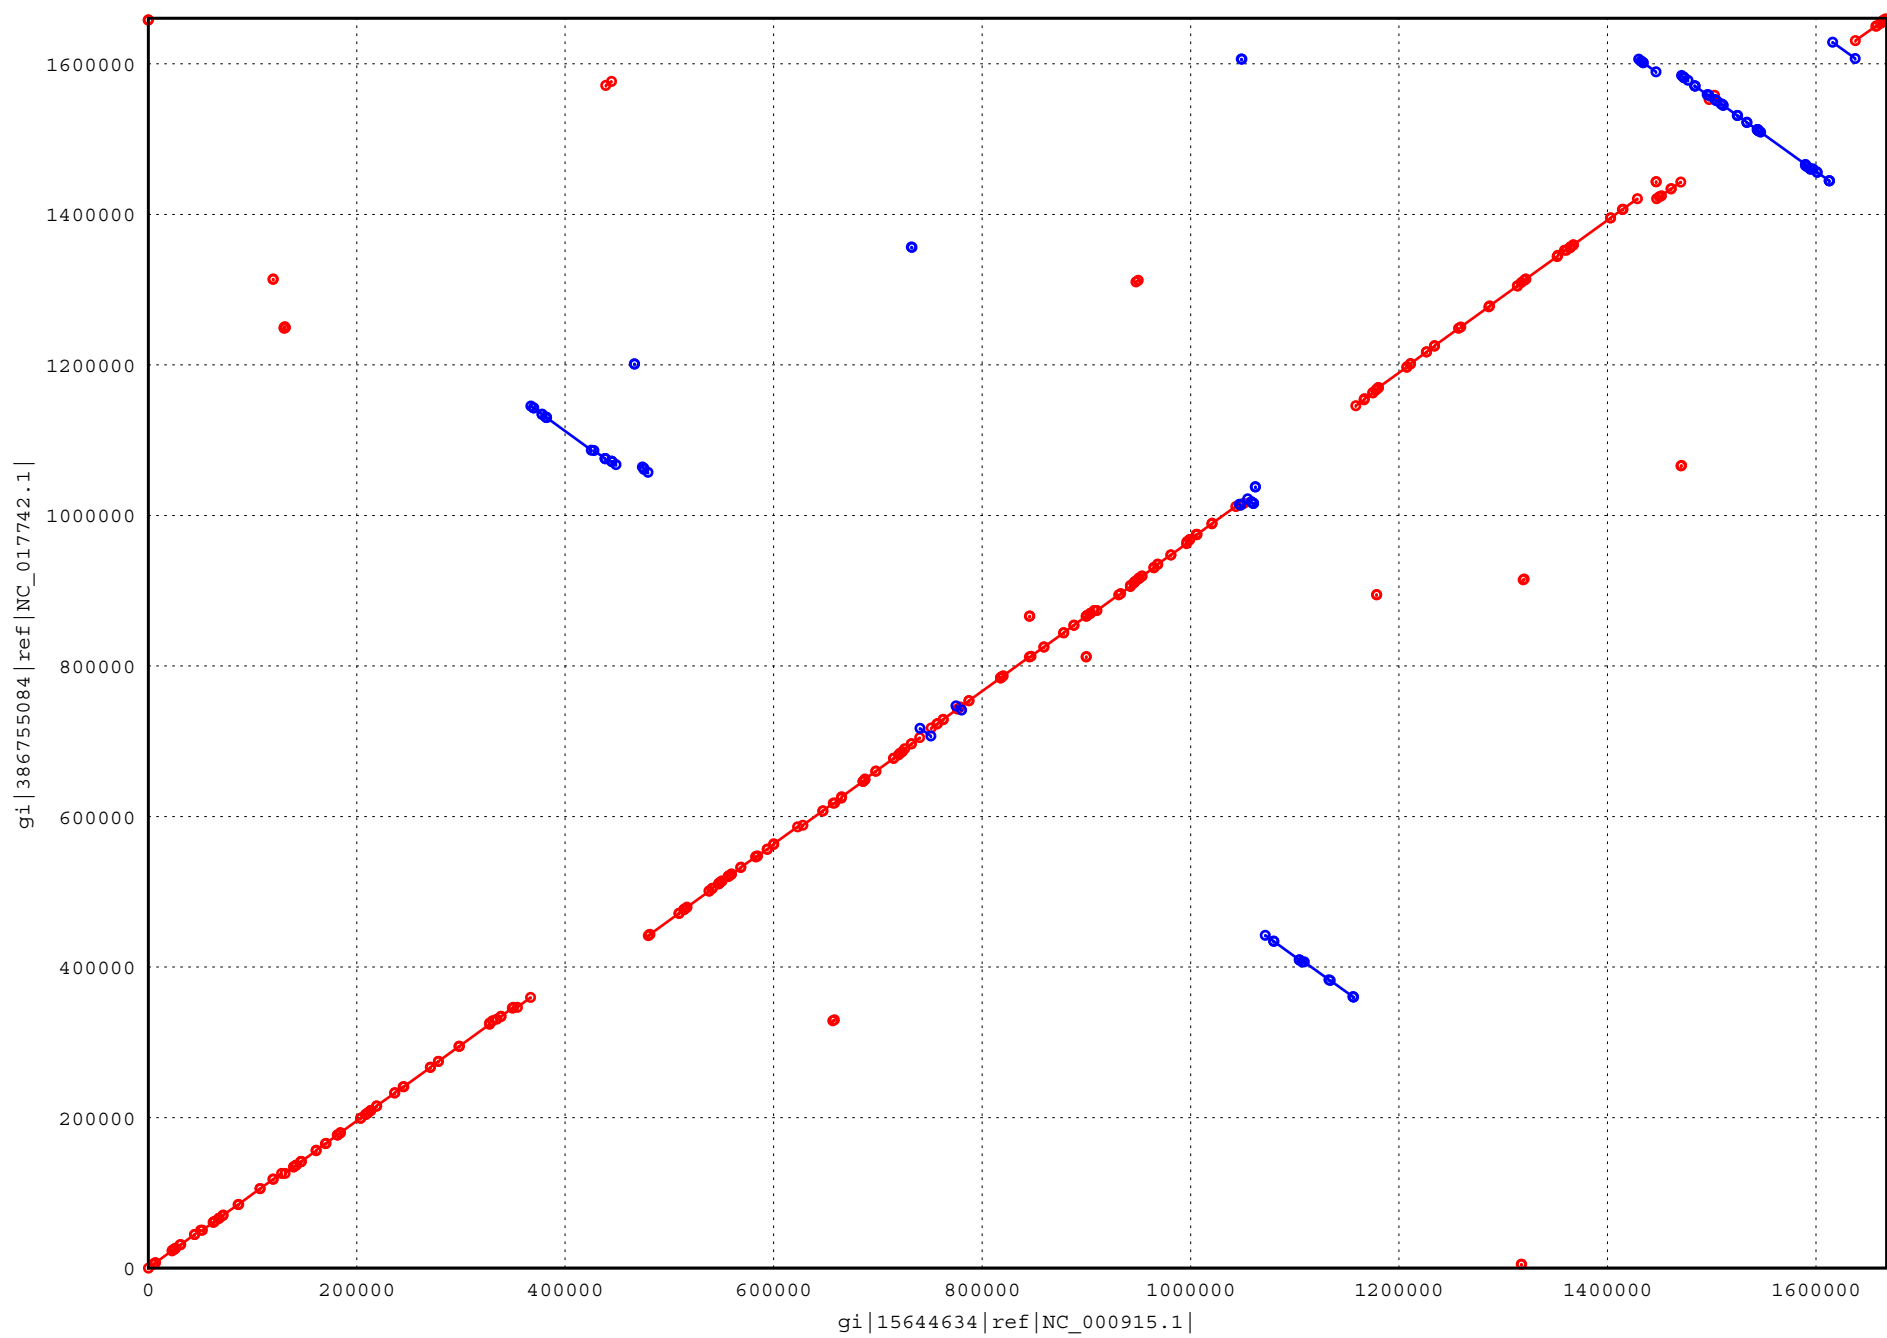

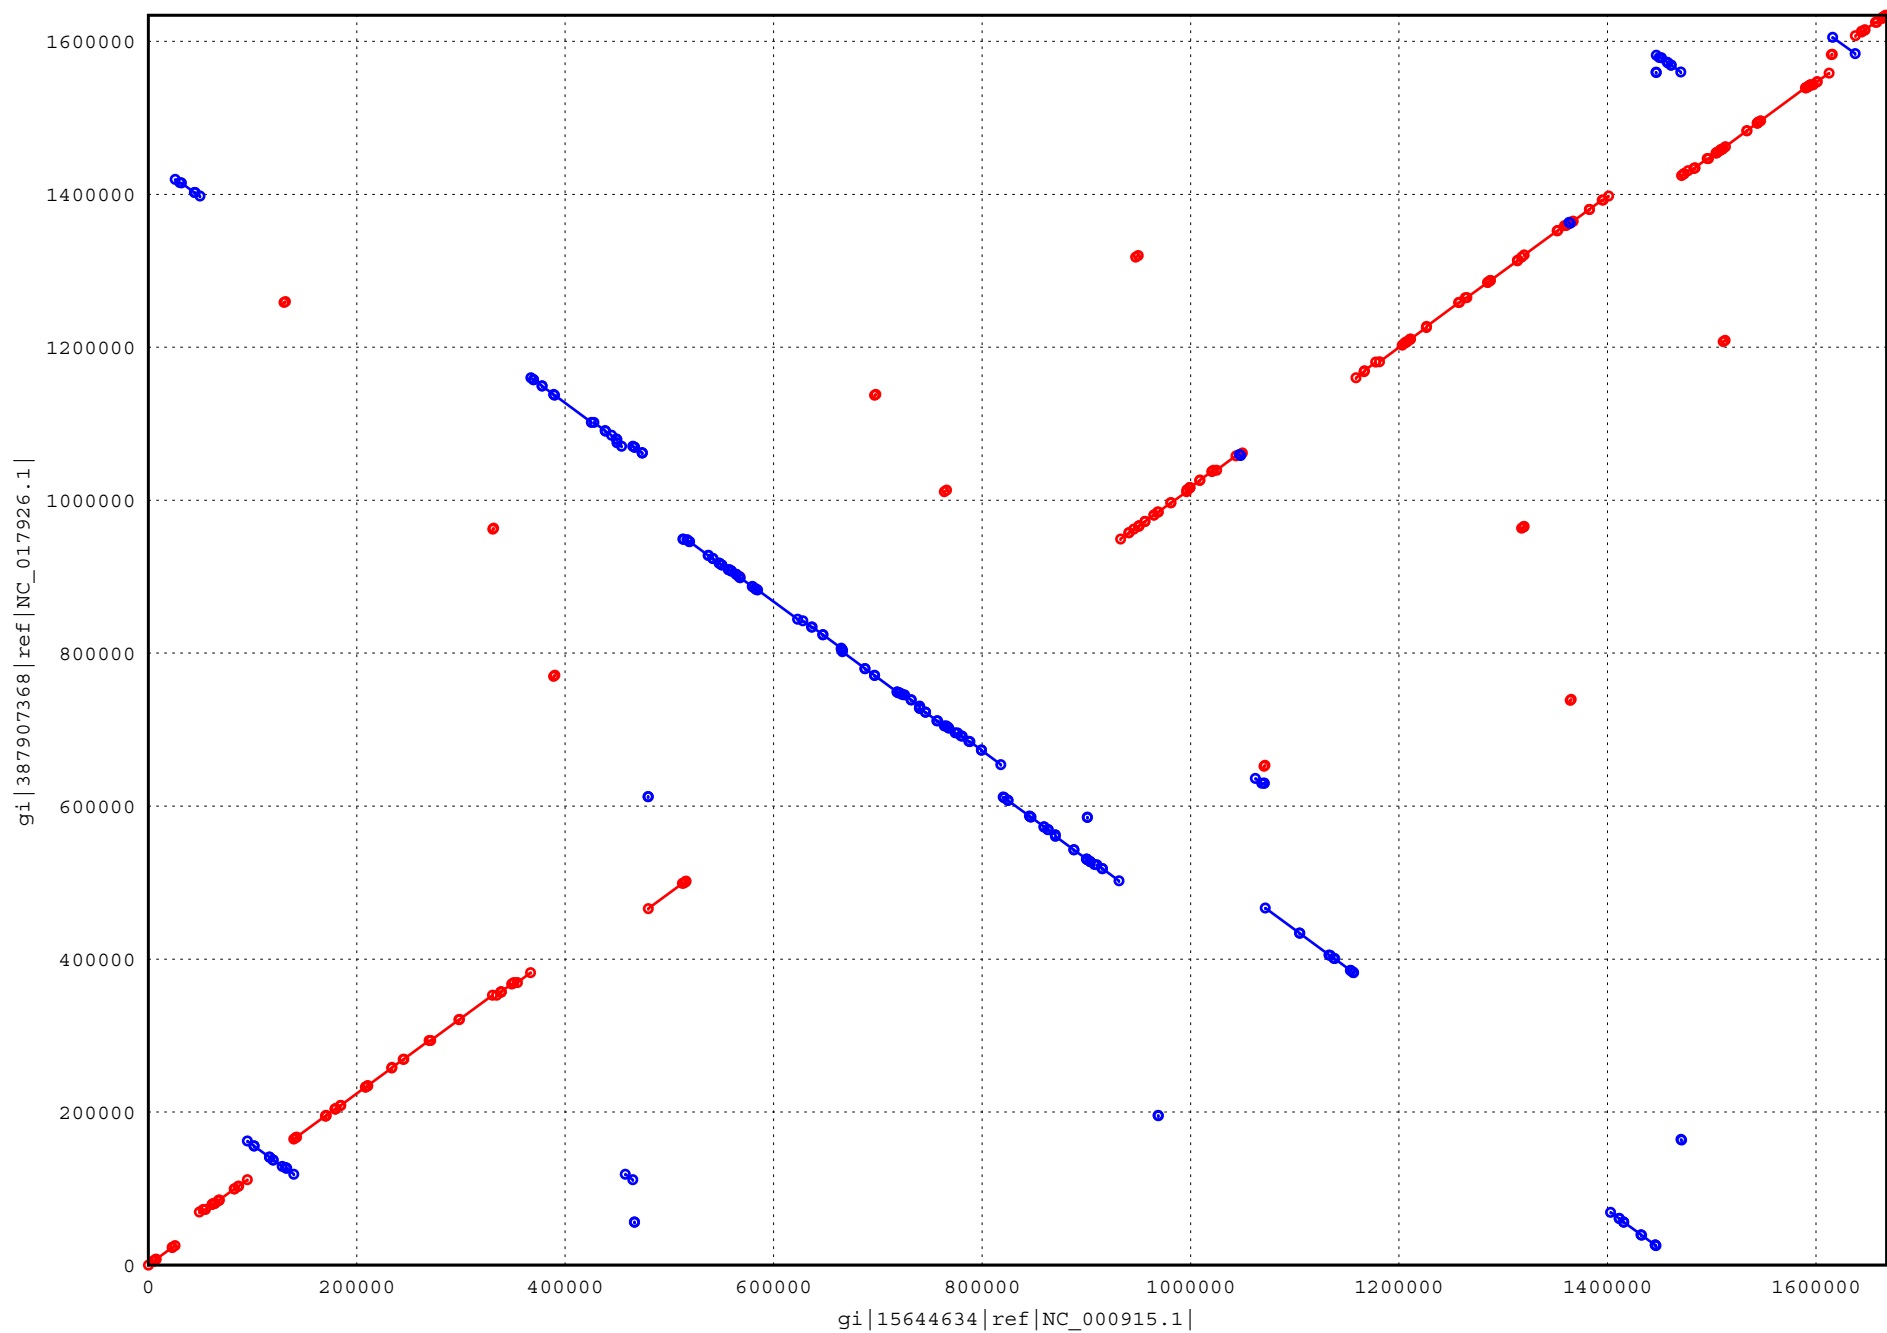

Supplement: c3mb70476a.pdf [file c3mb70476a.pdf]

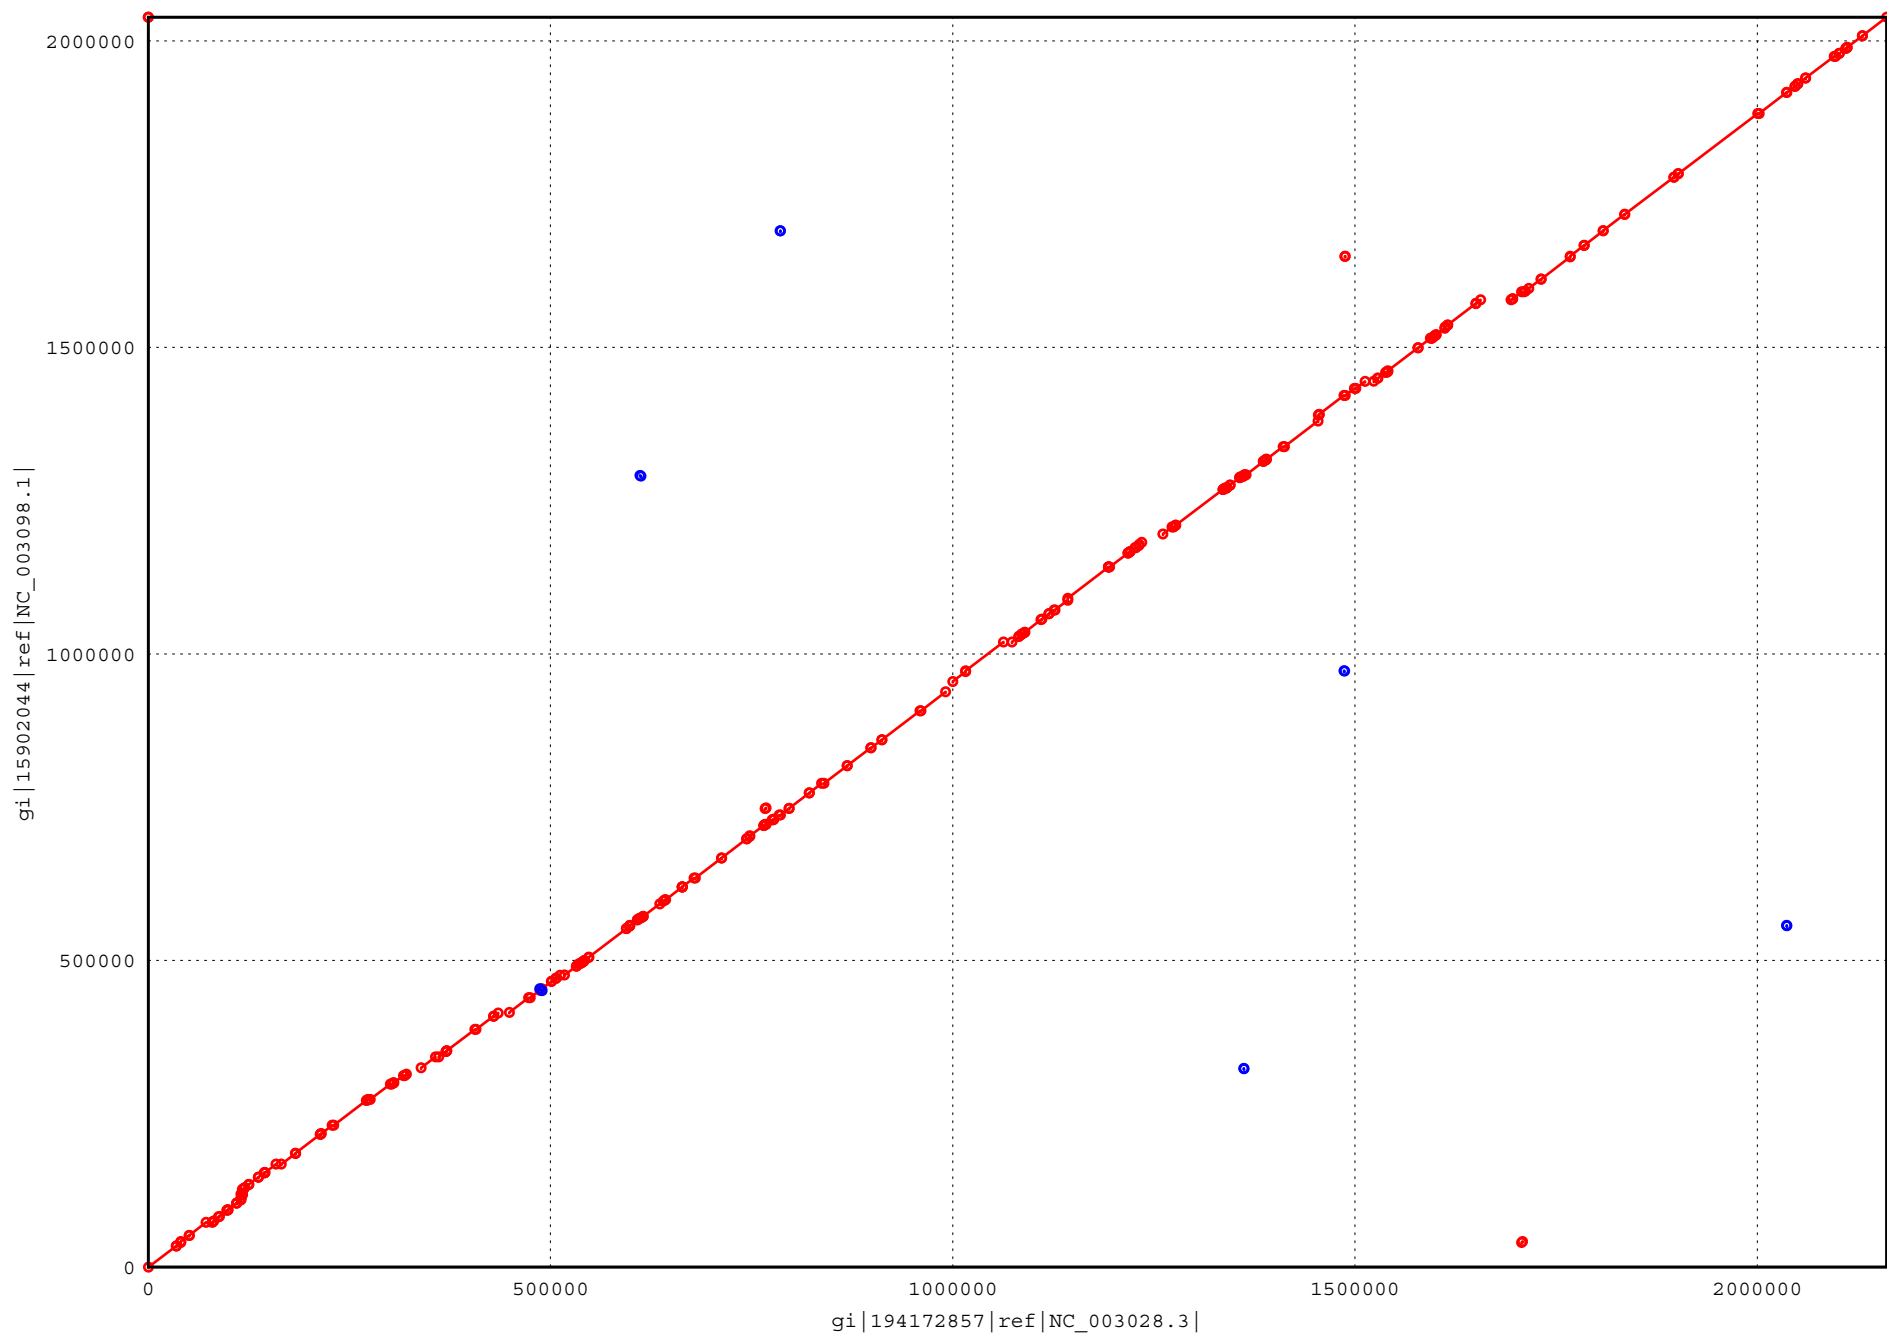

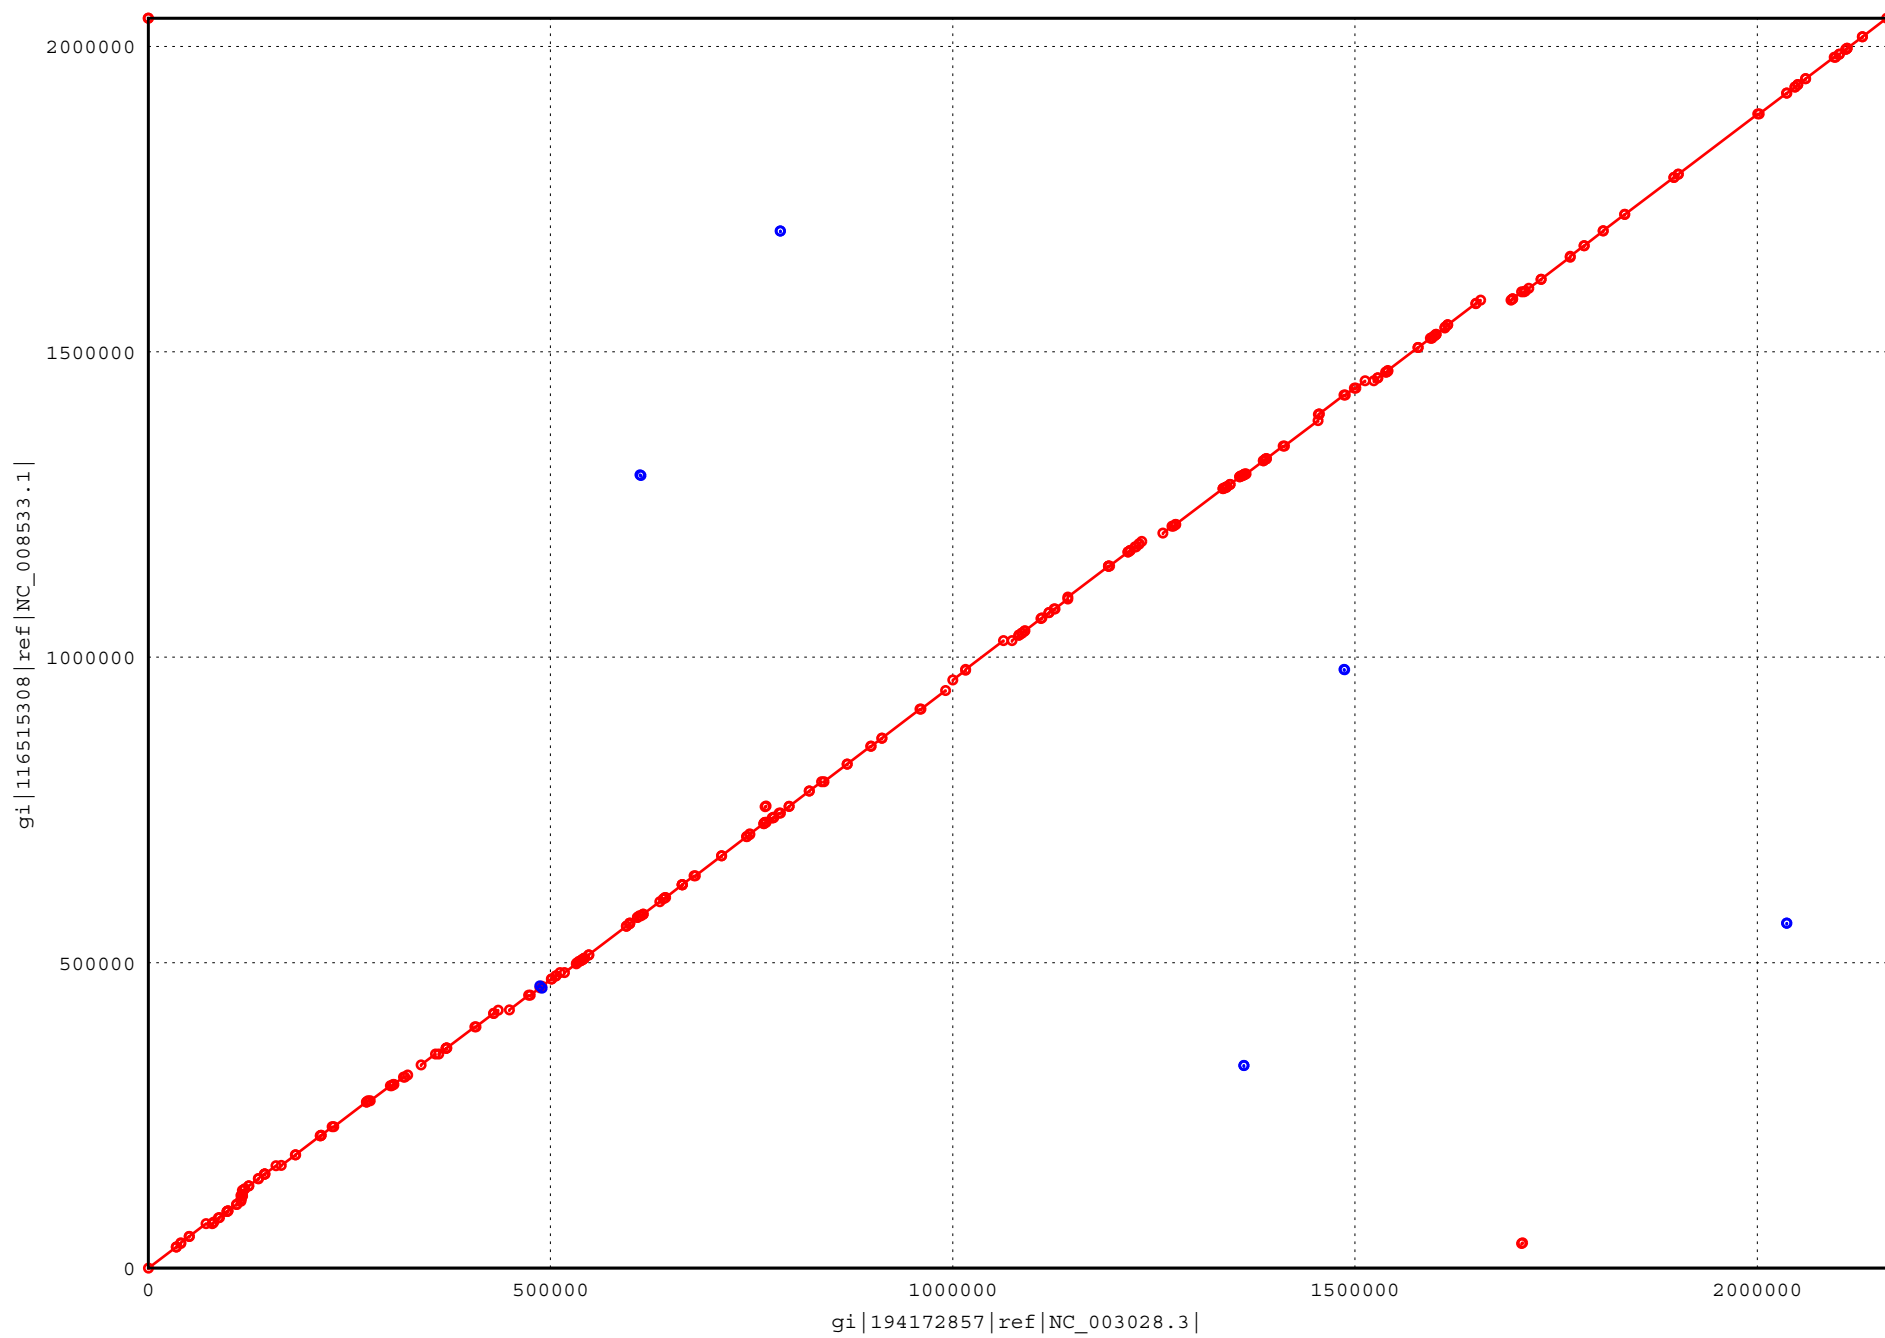

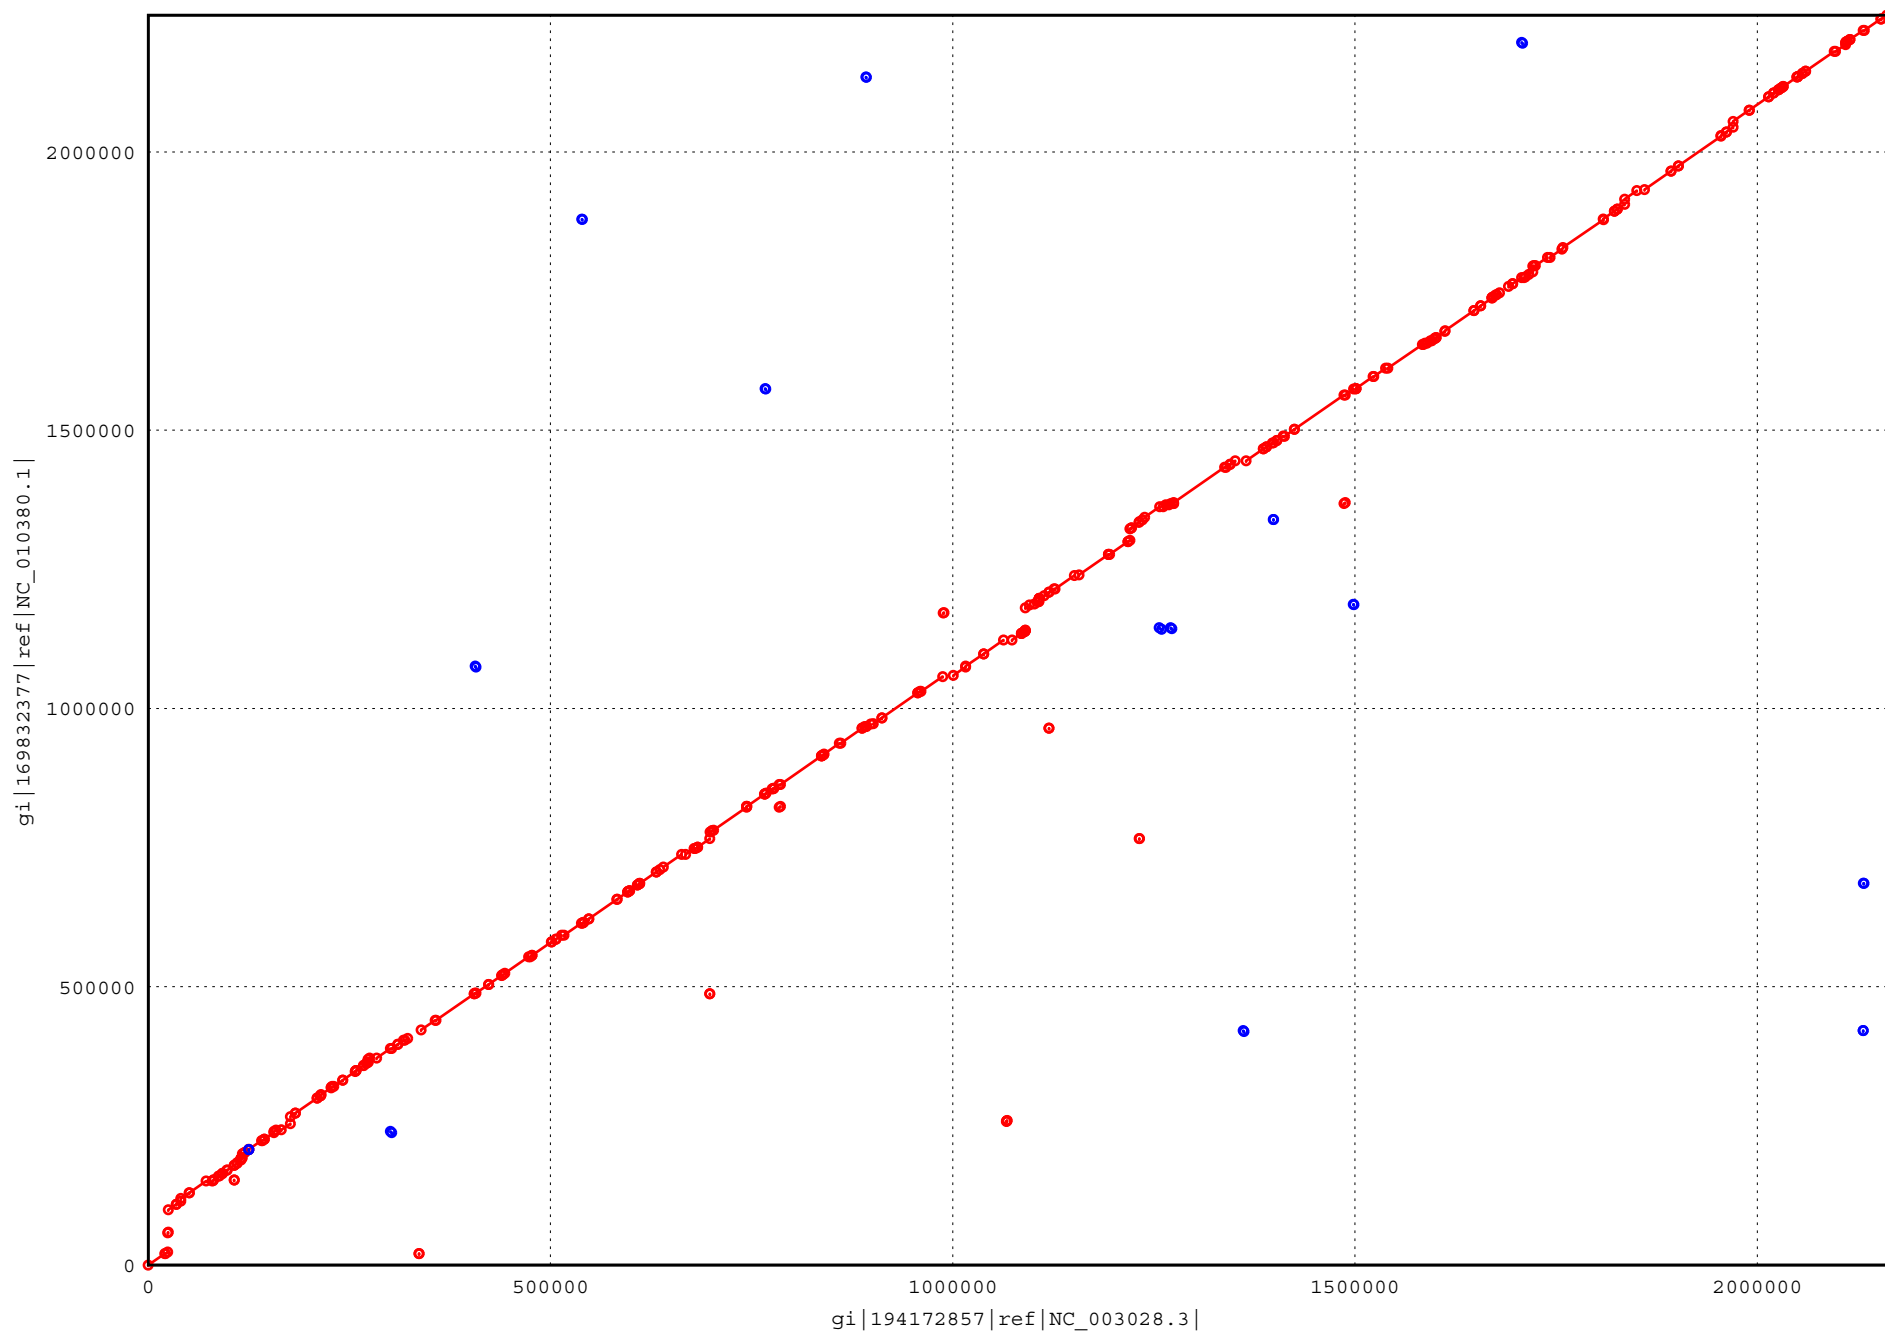

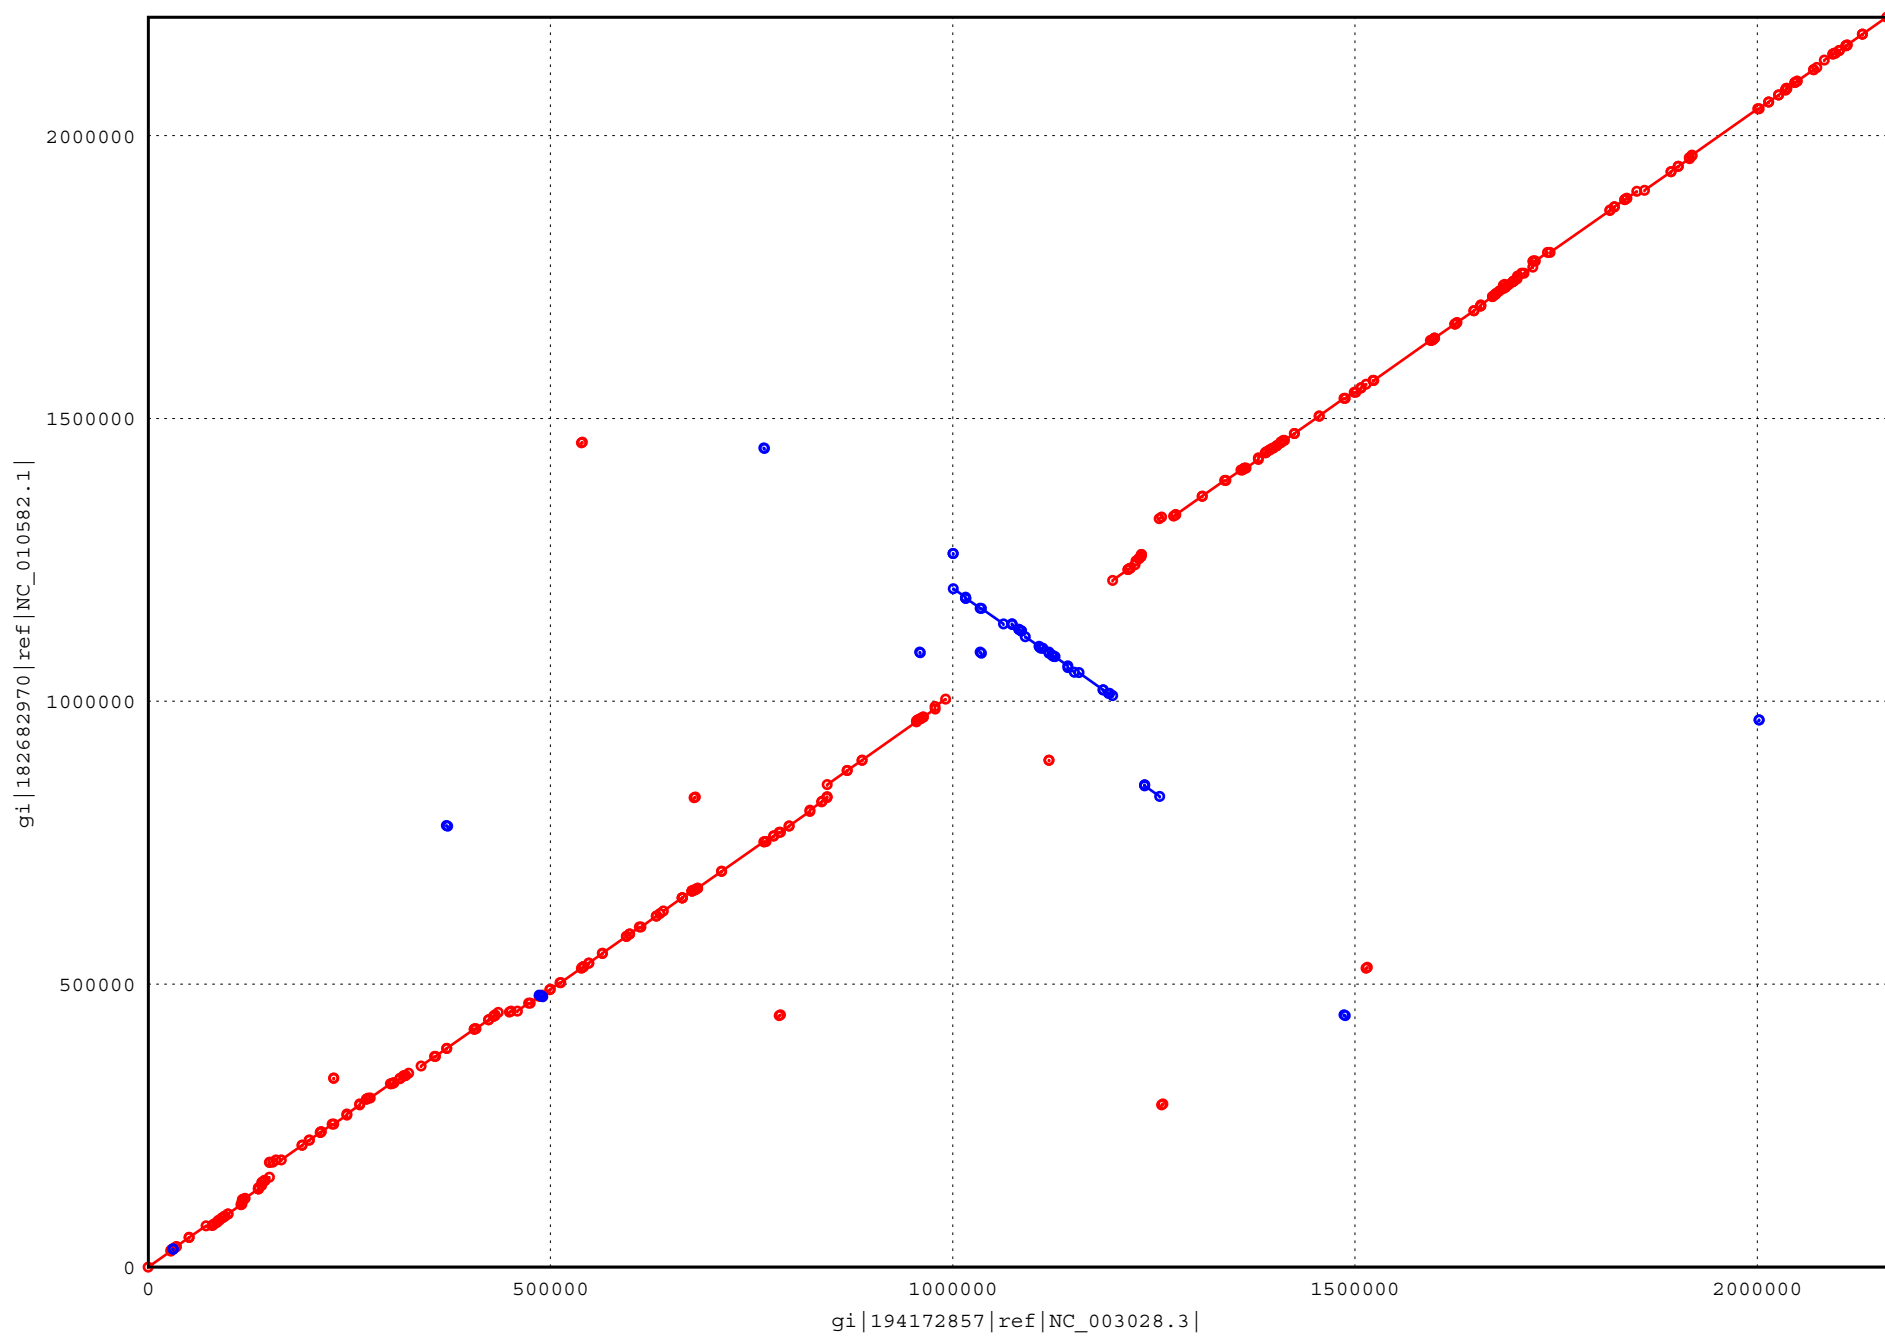

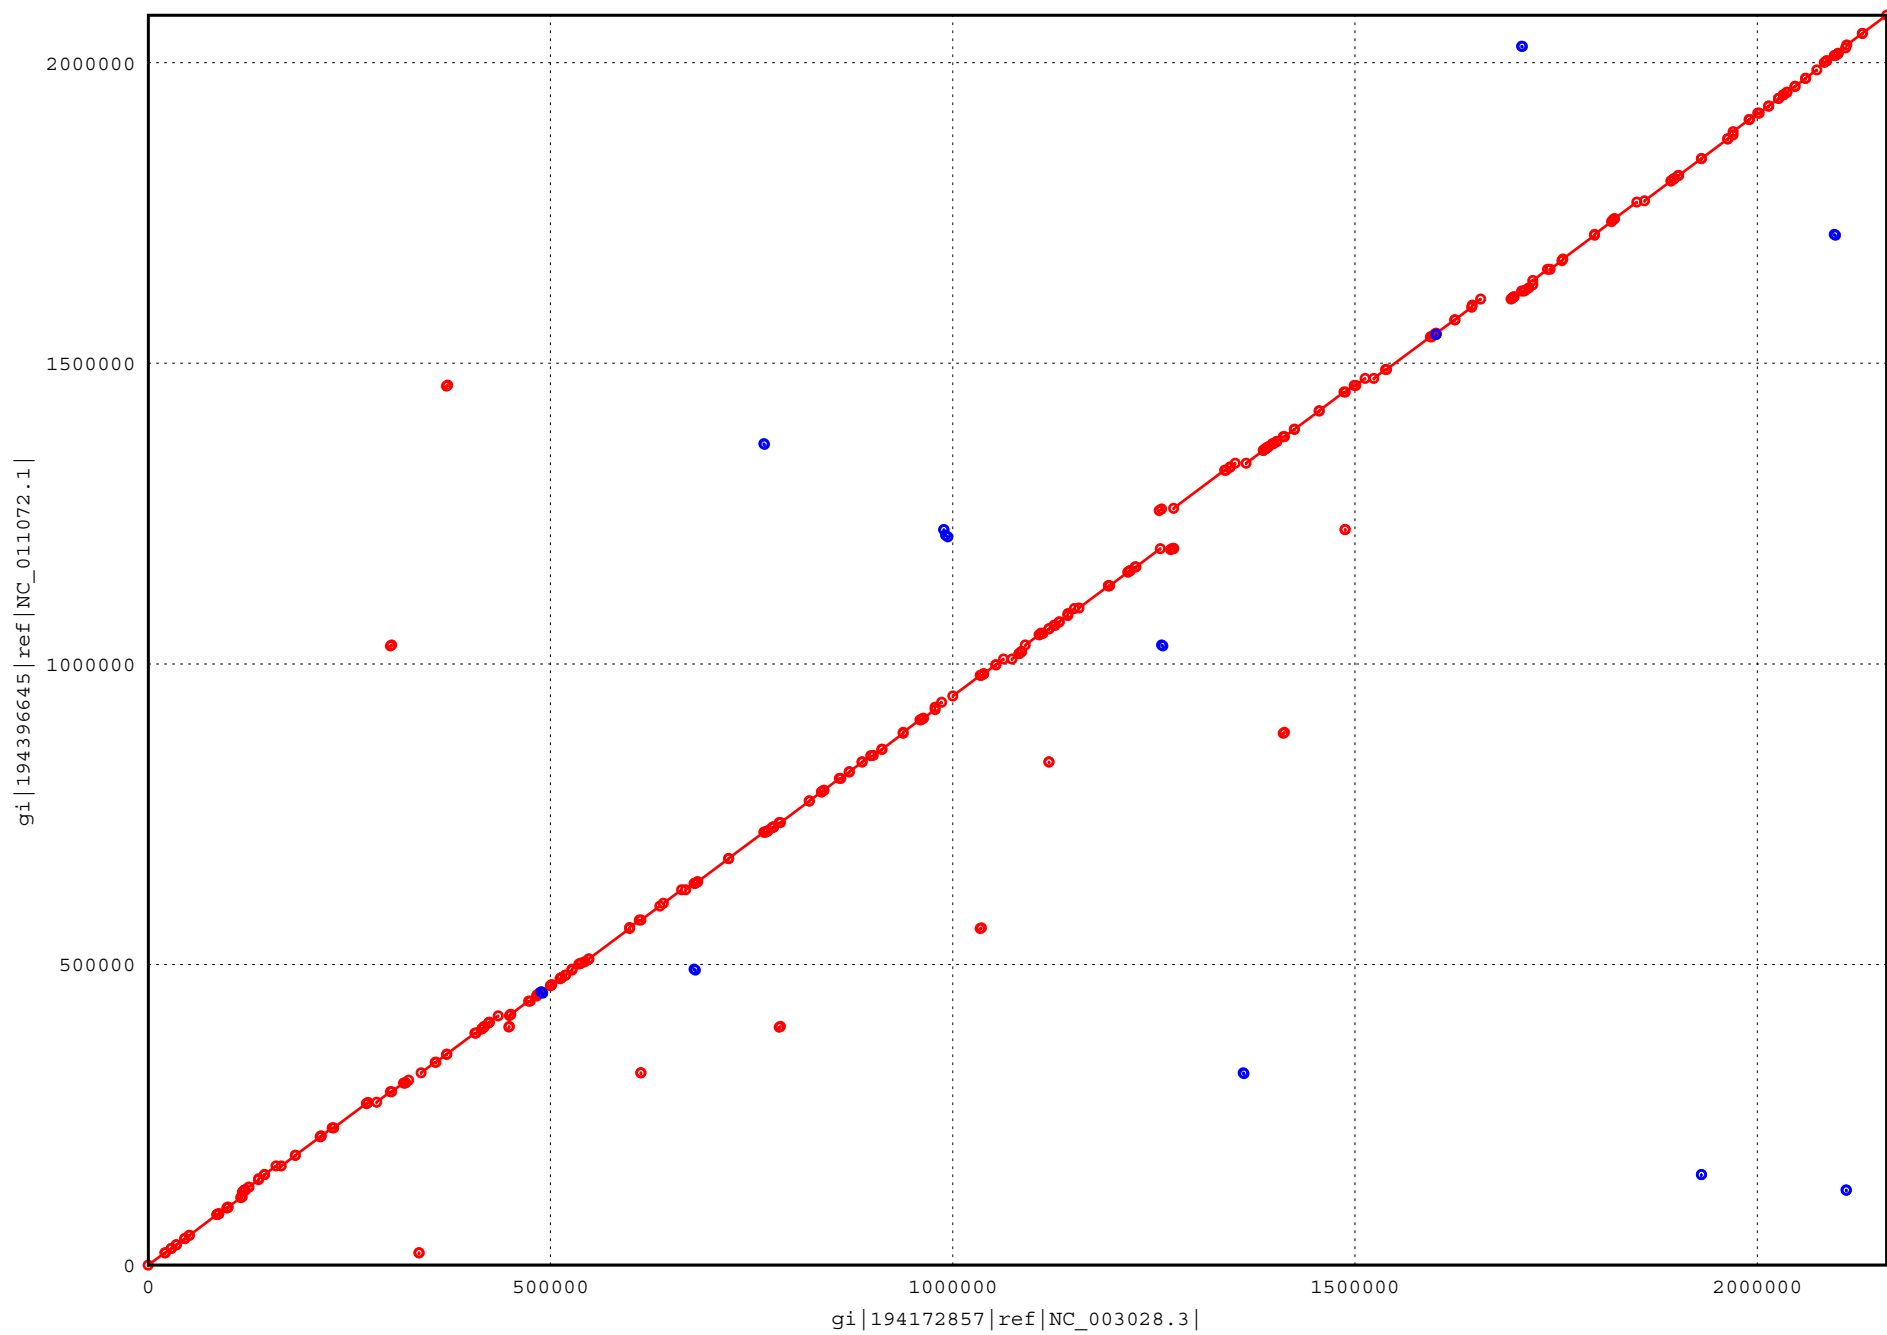

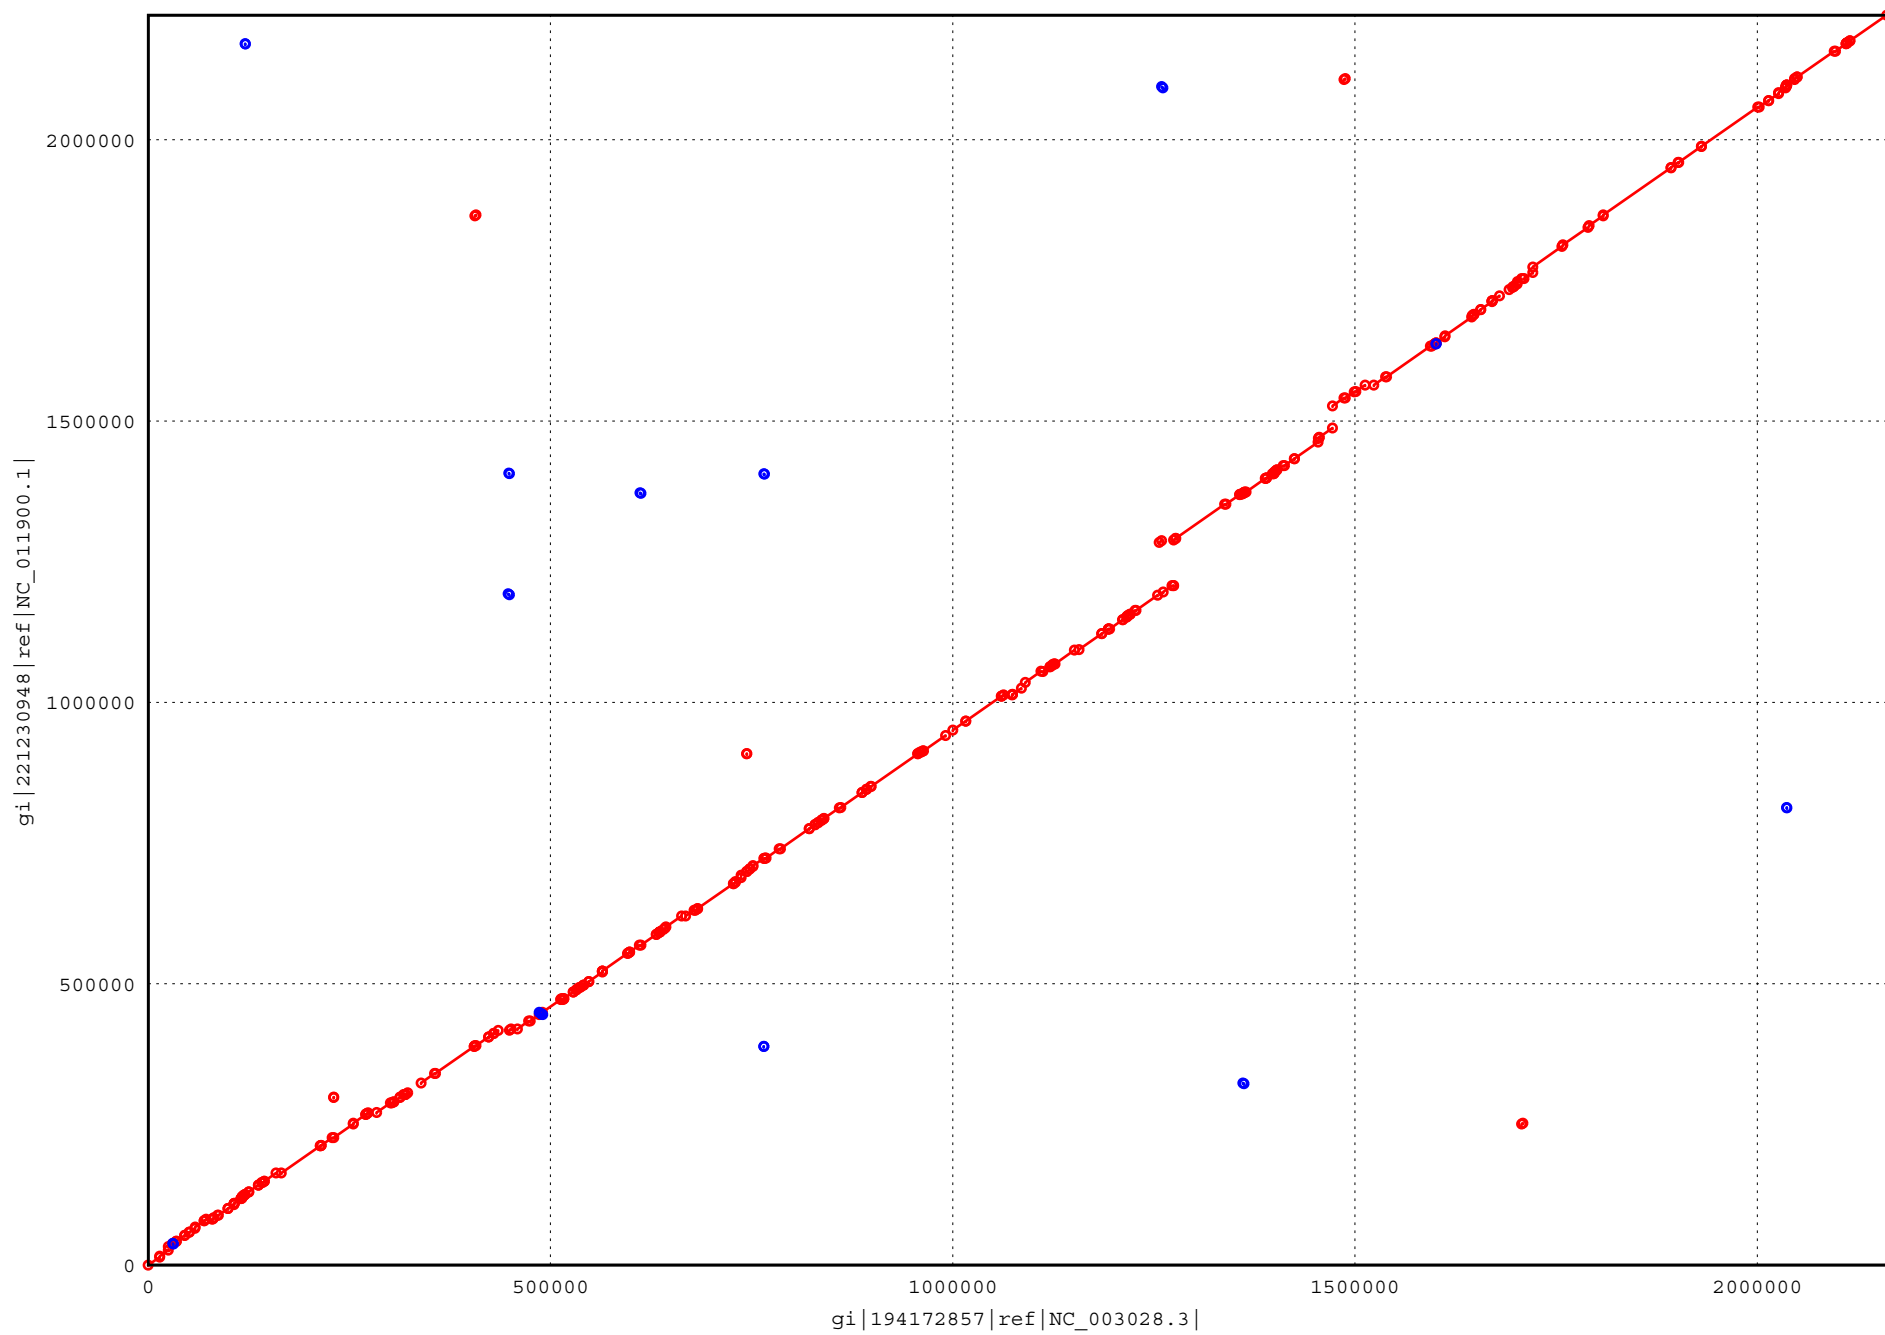

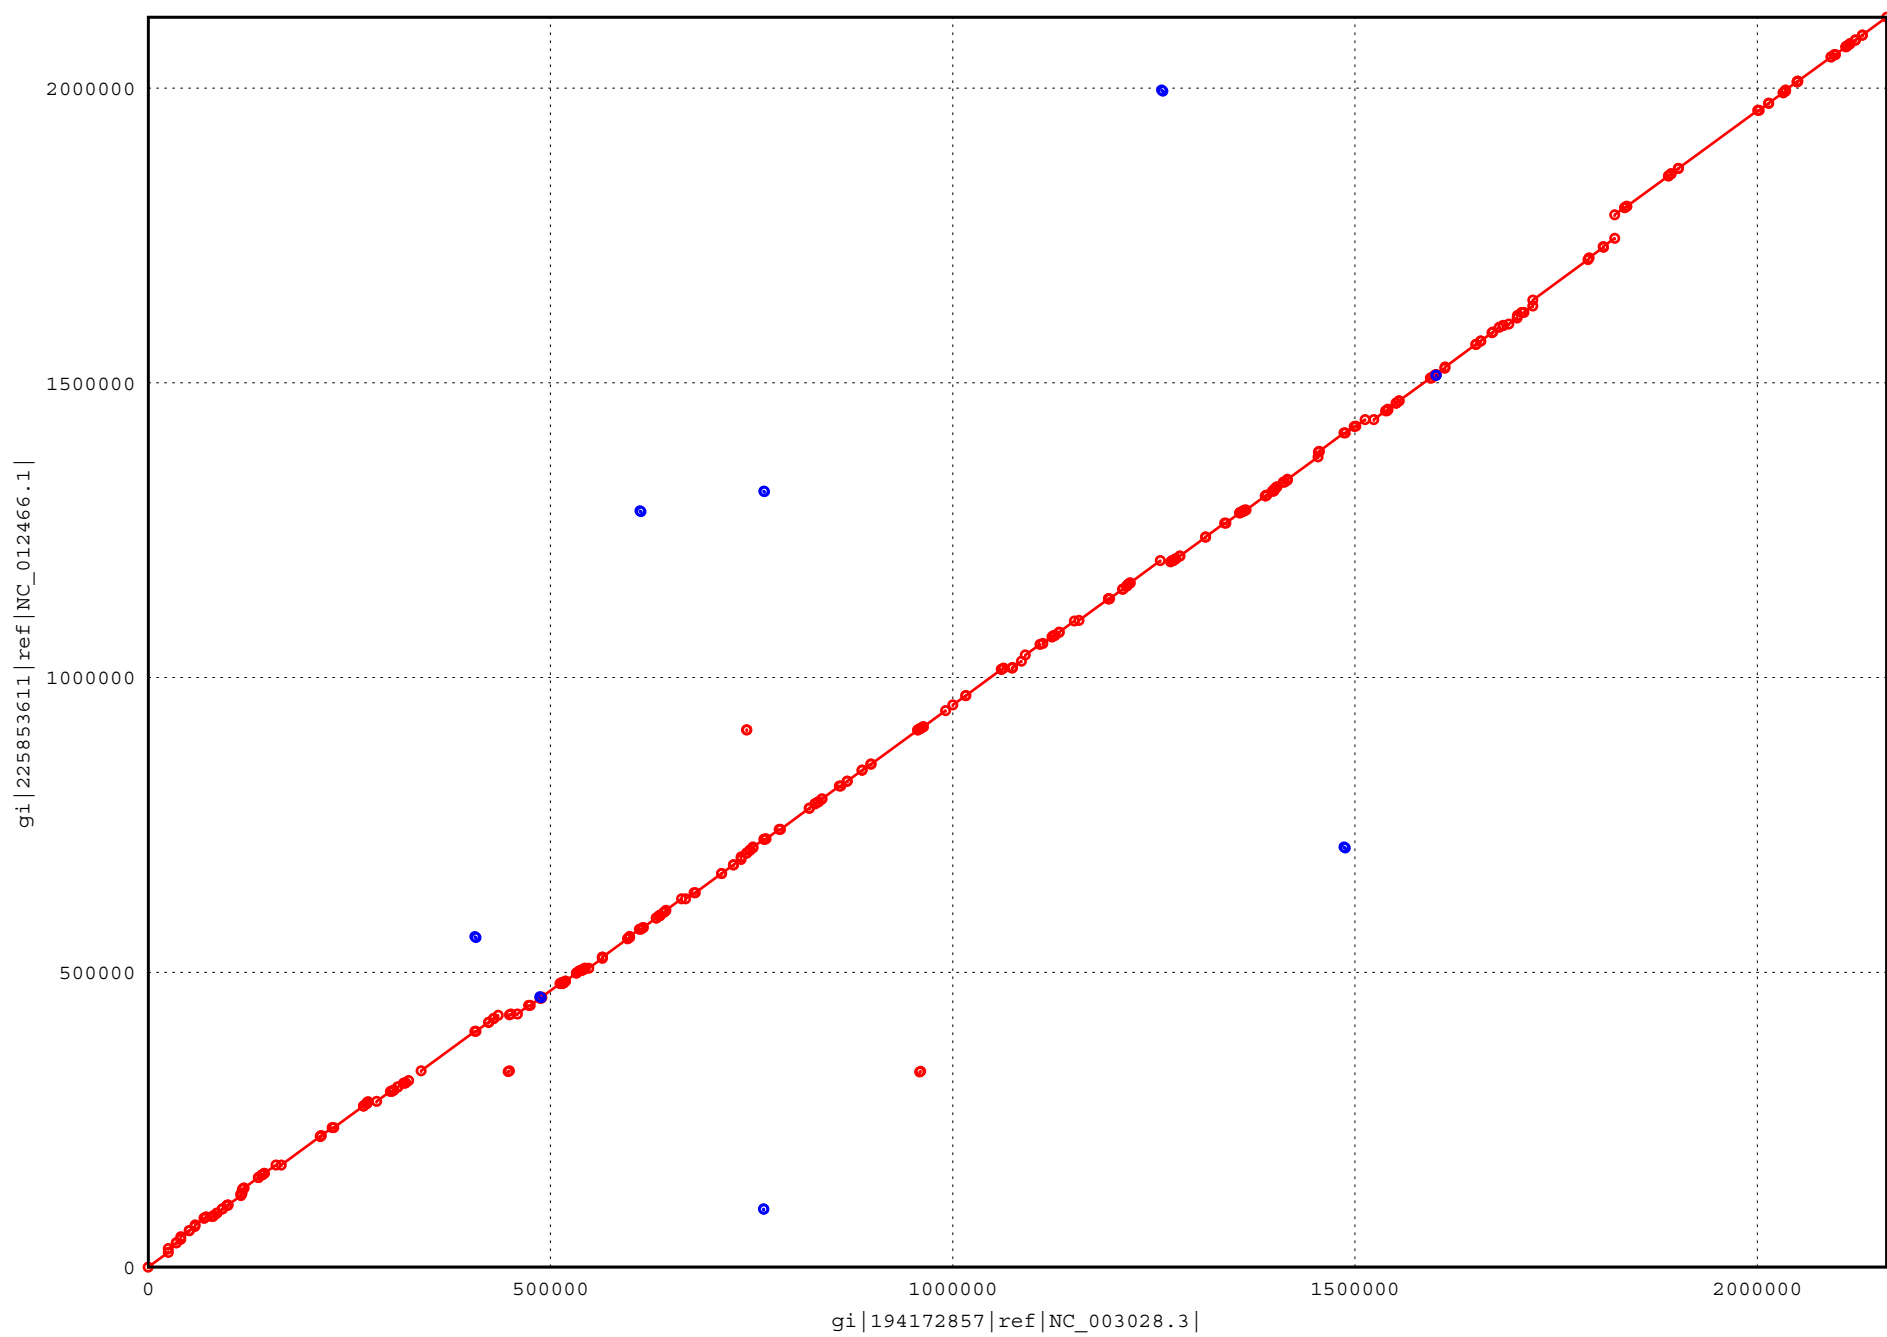

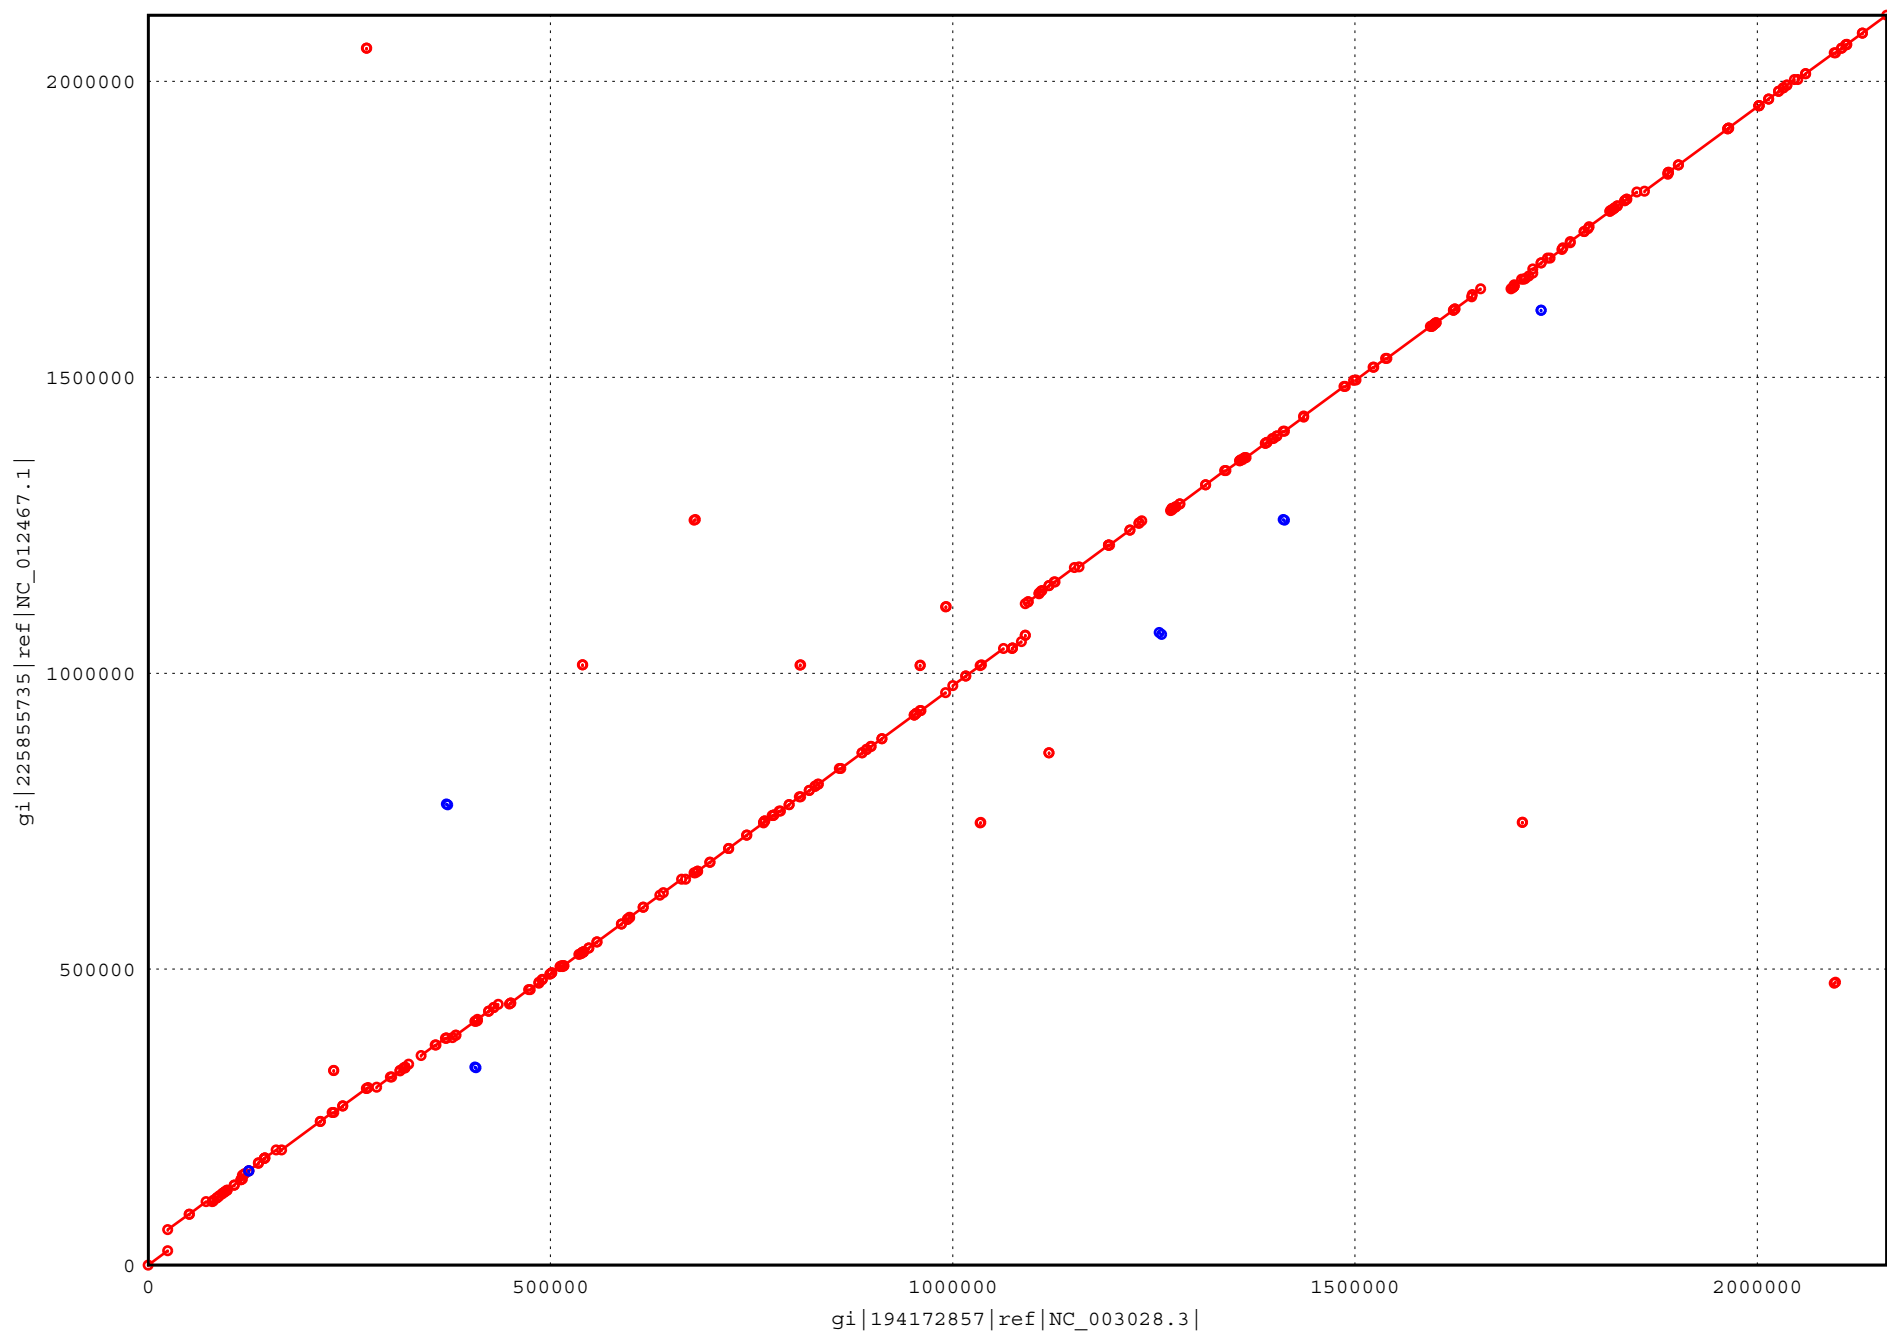



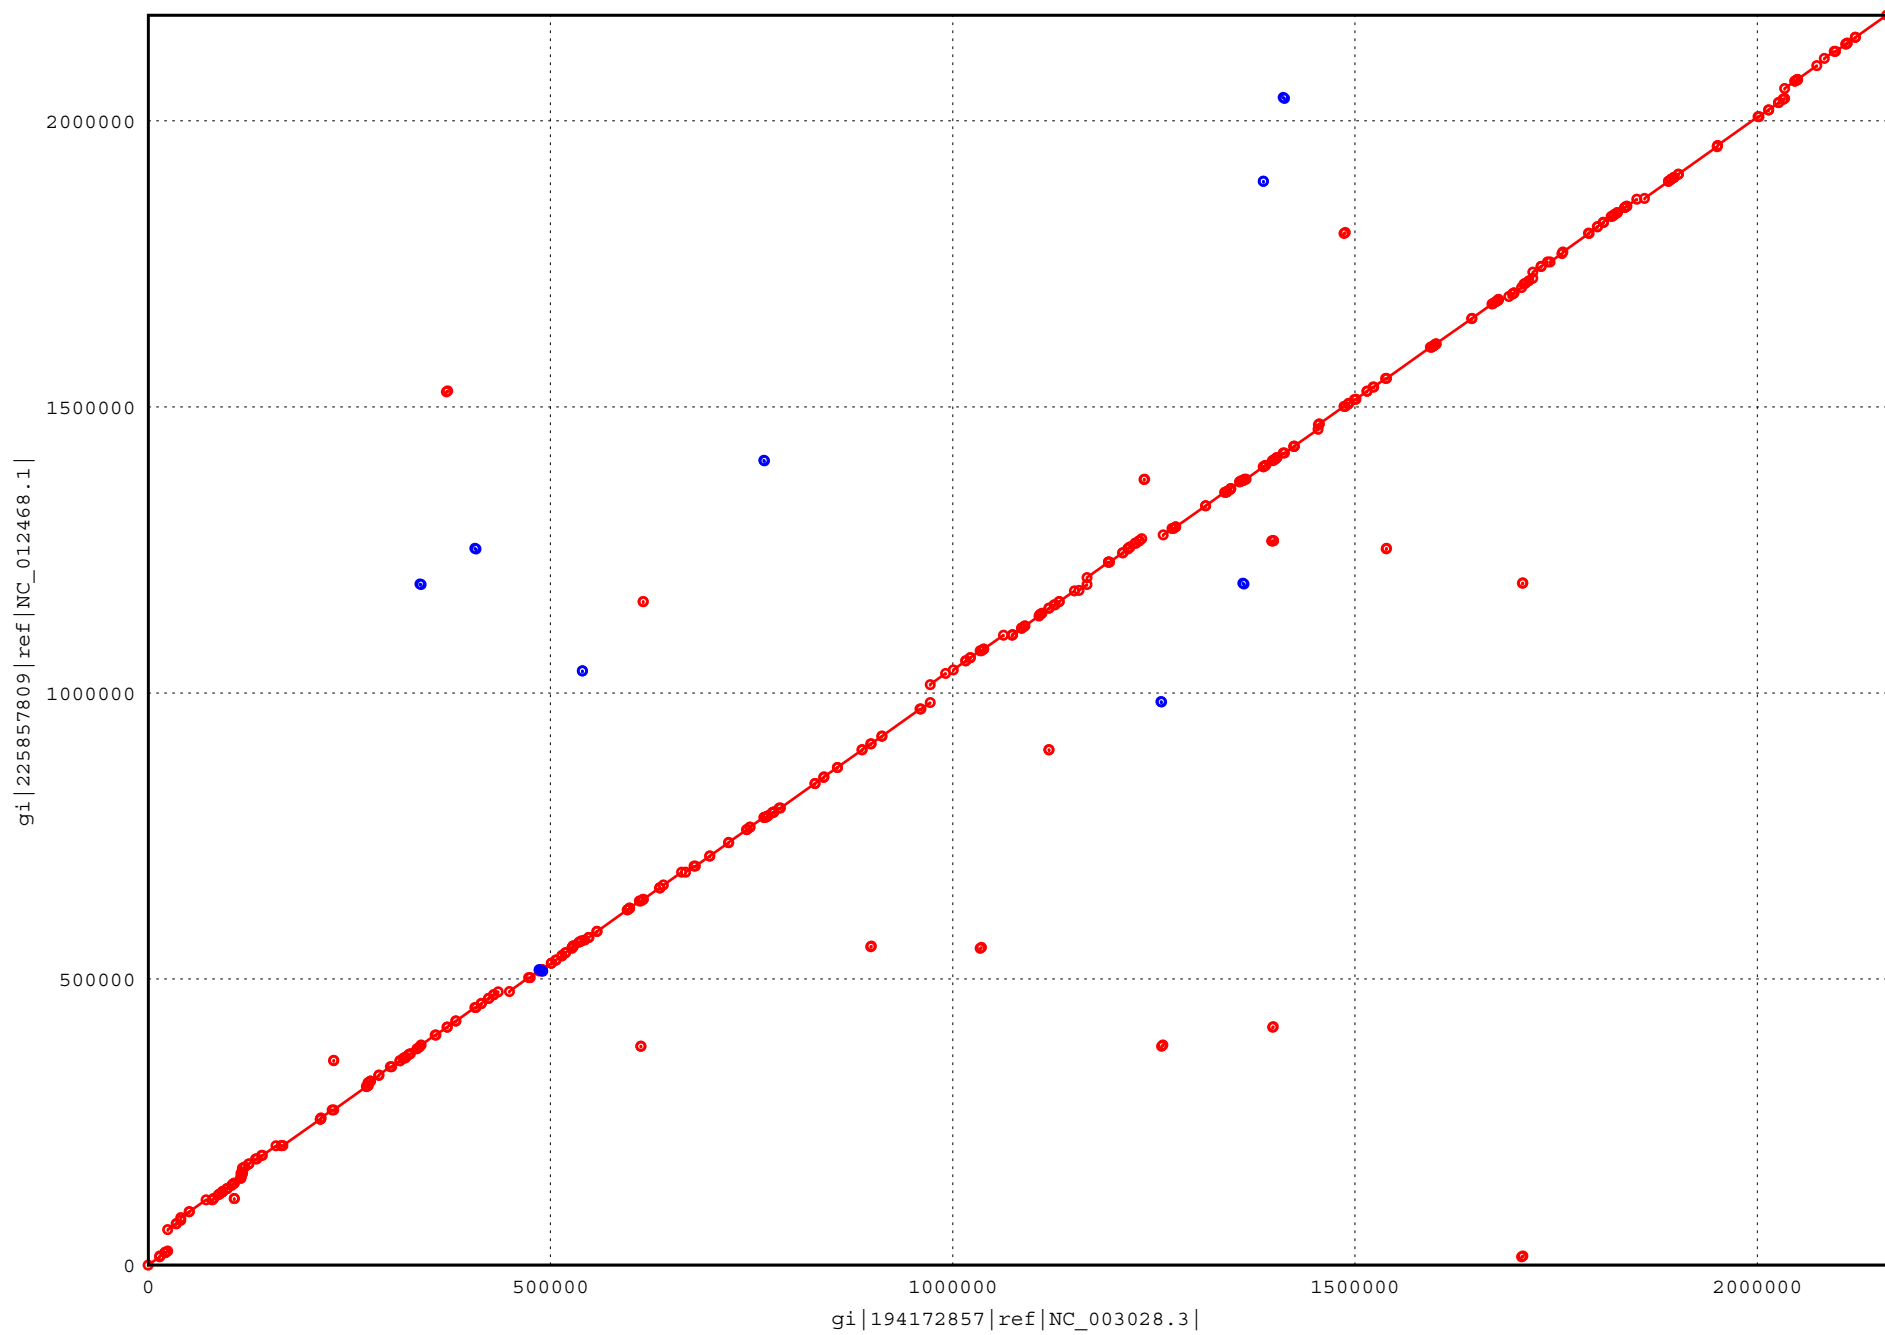

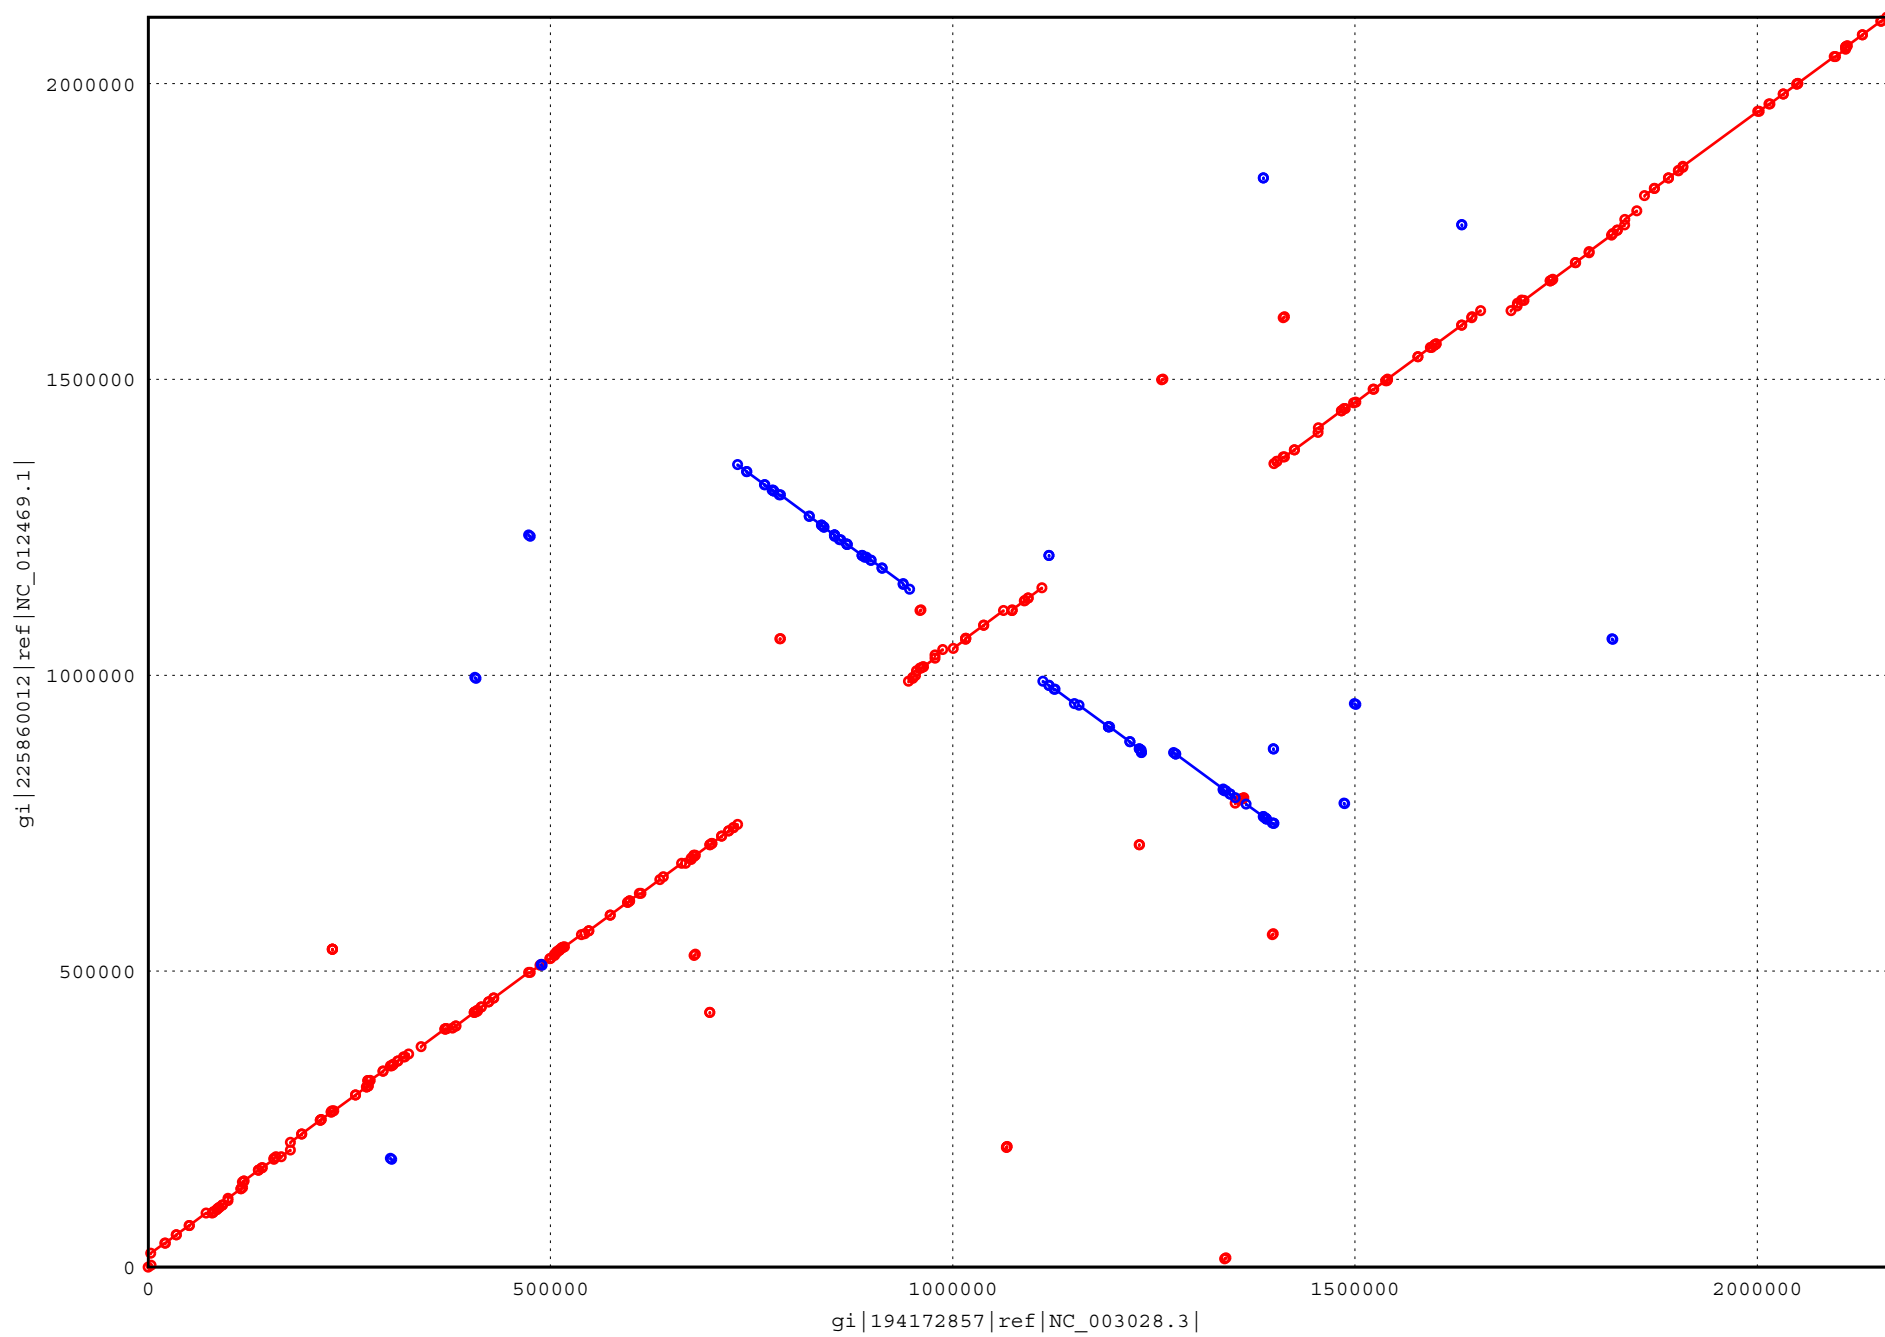

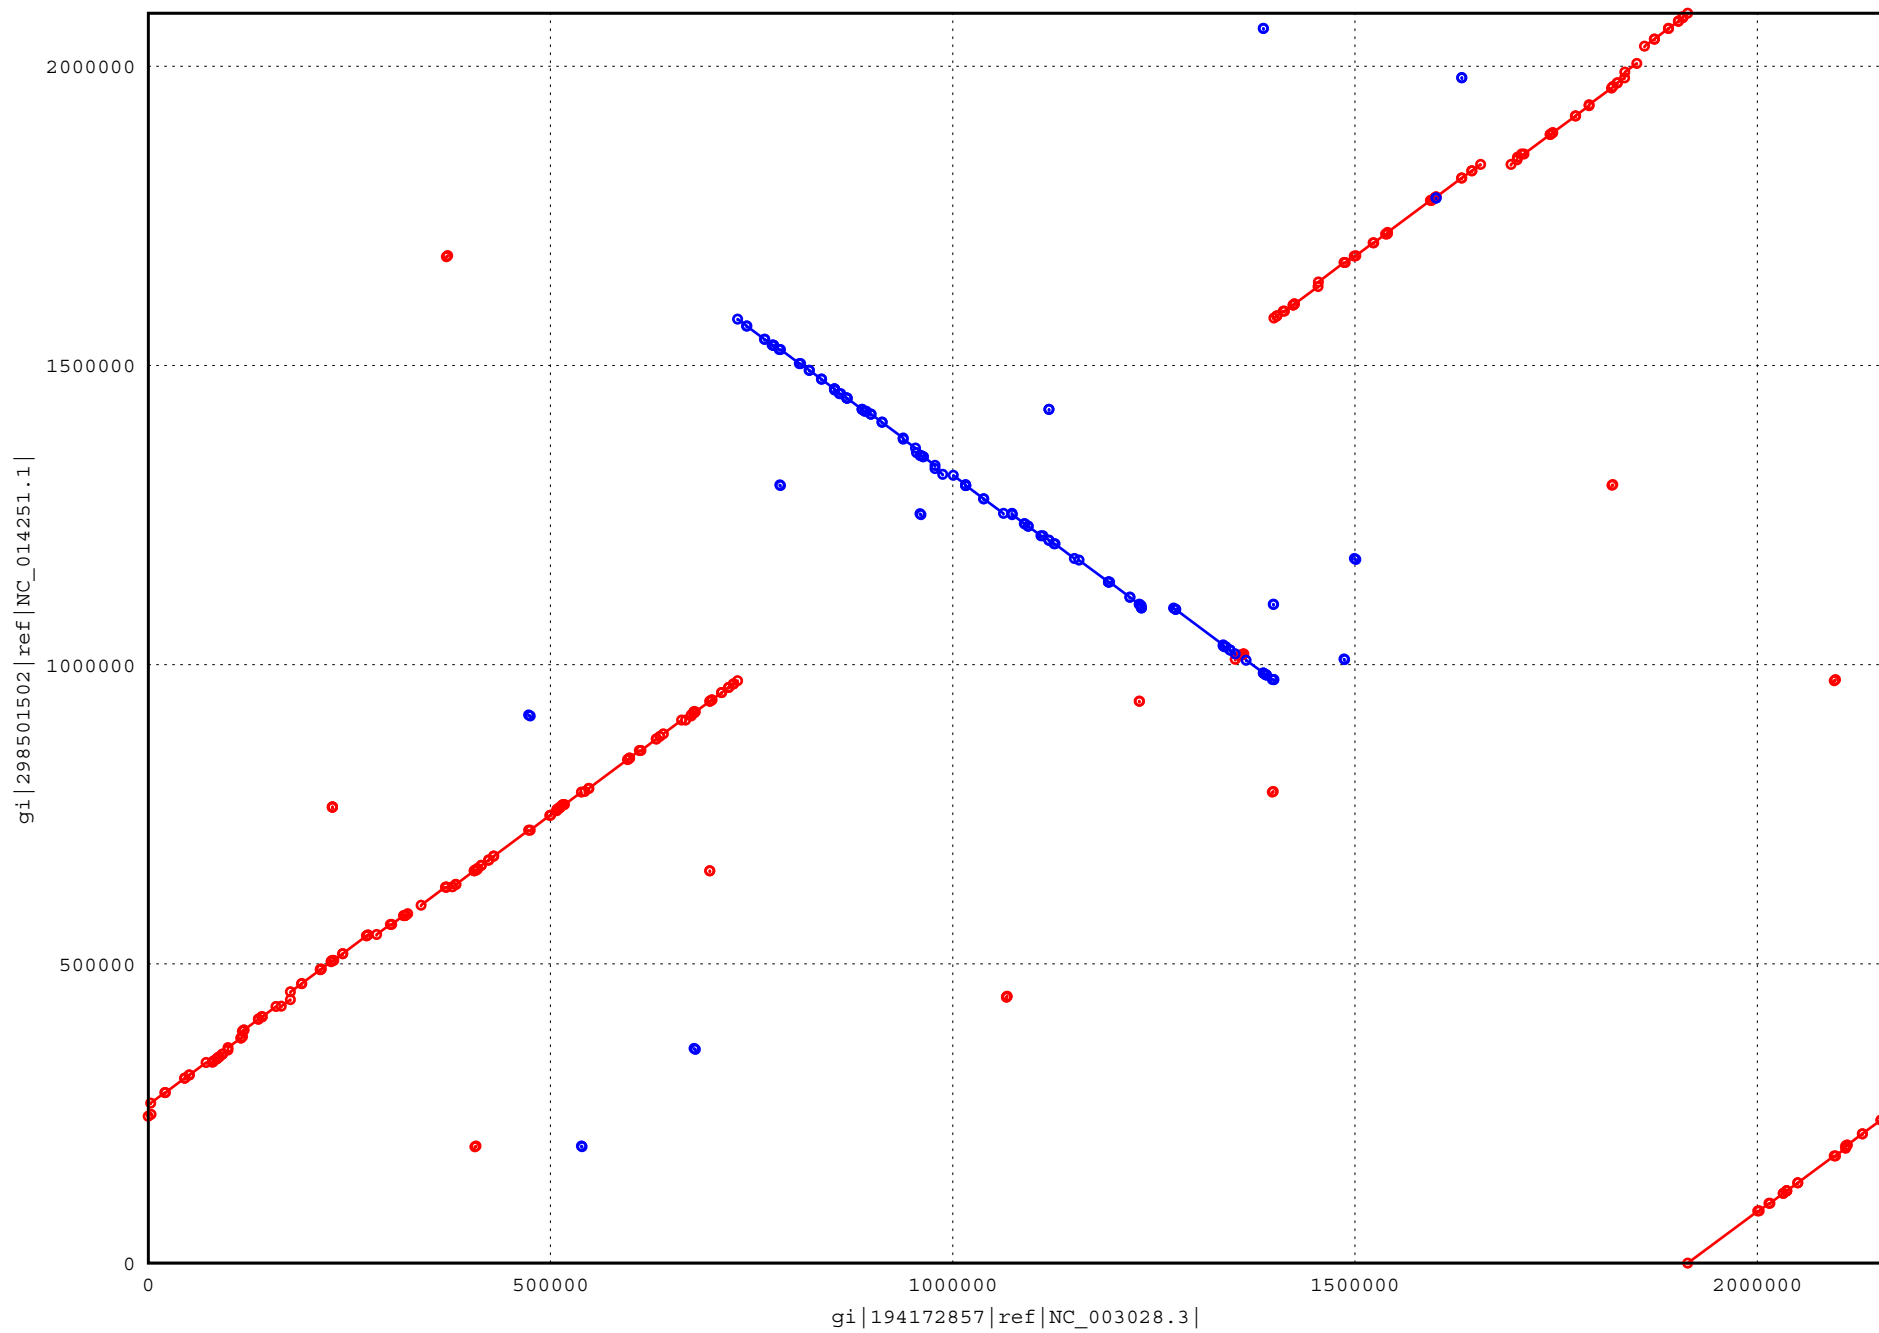

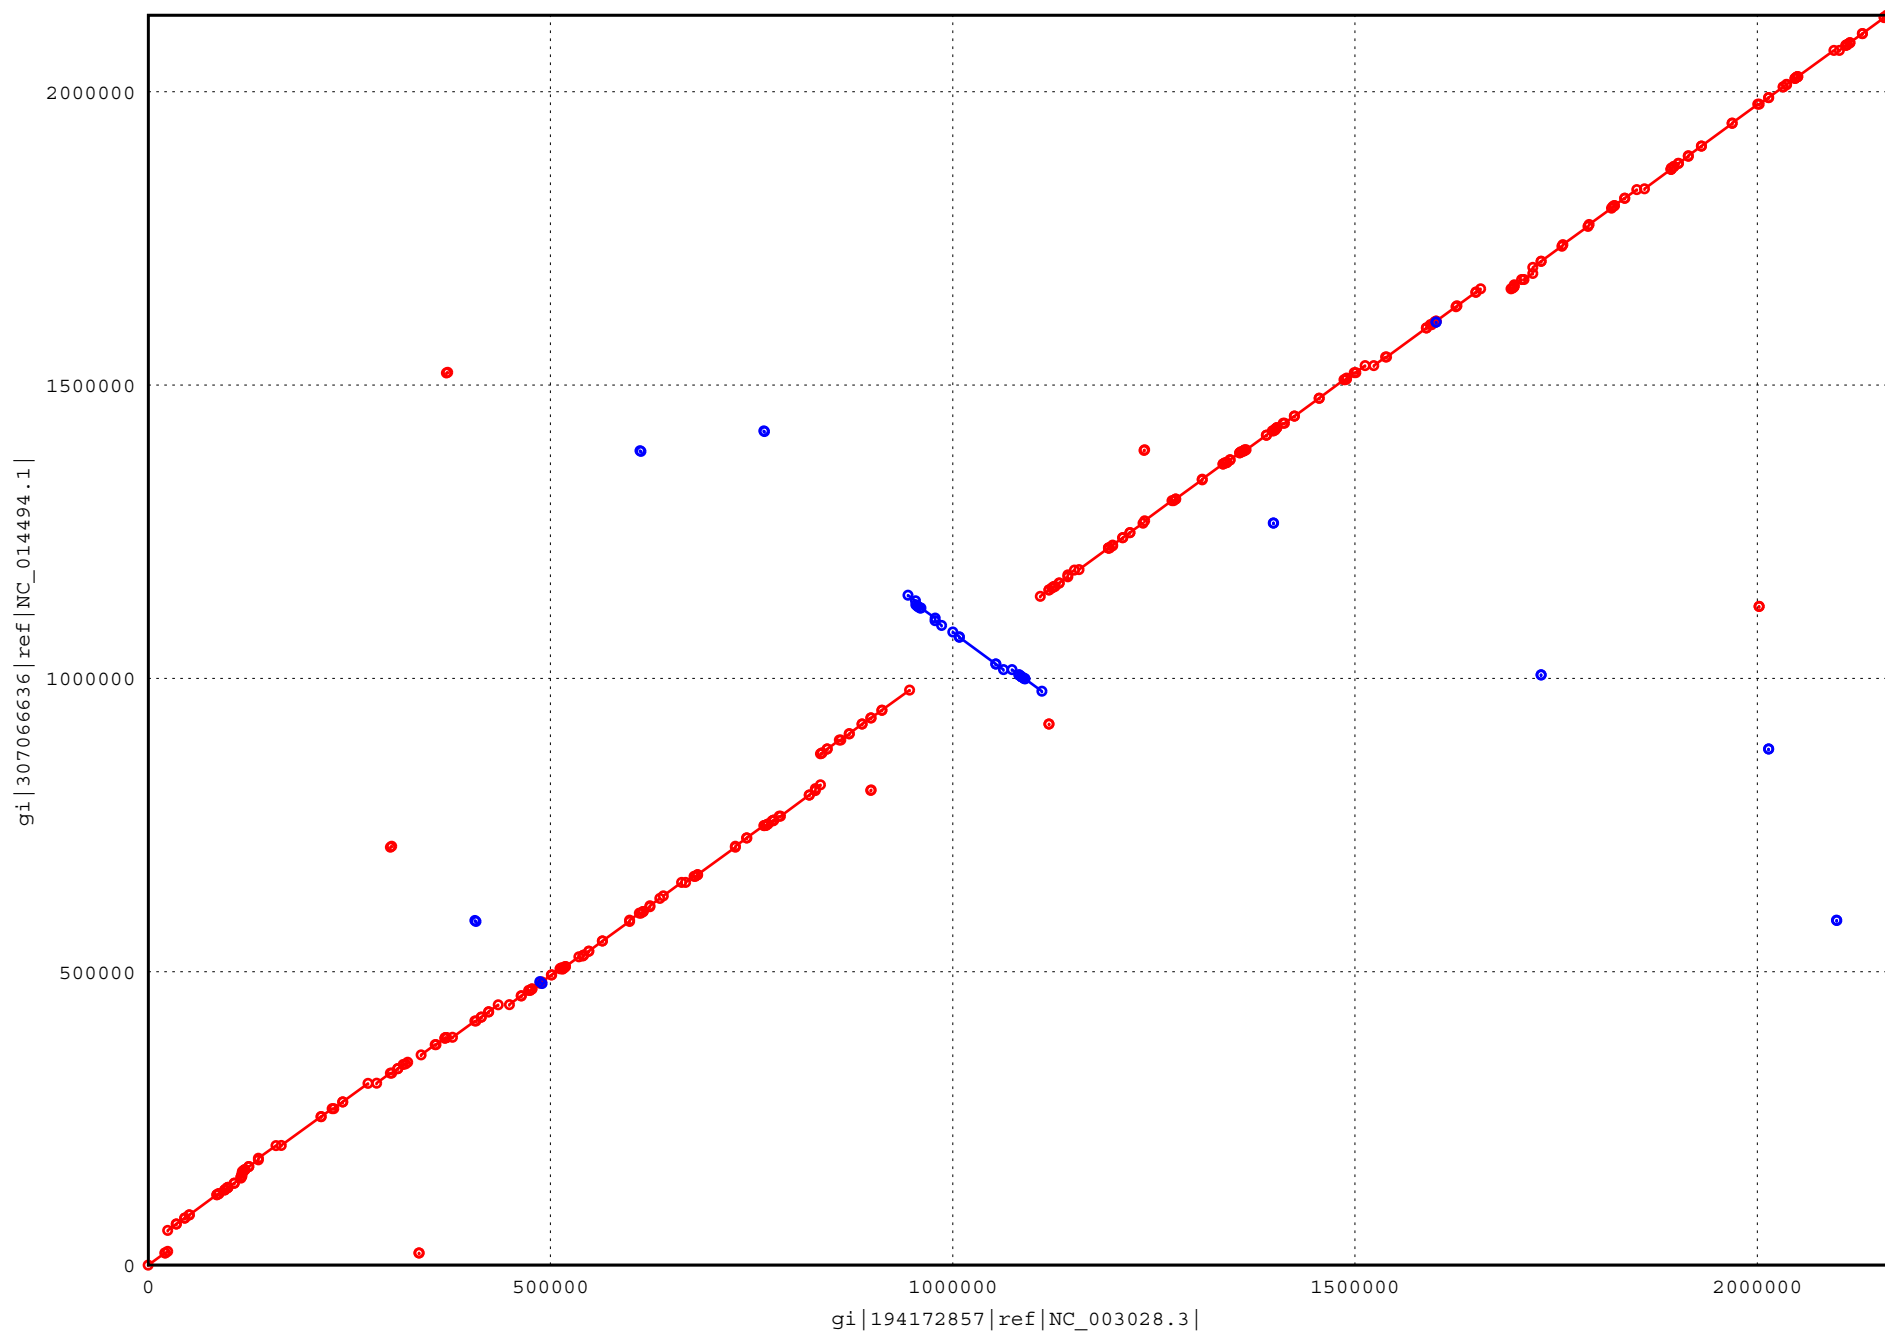

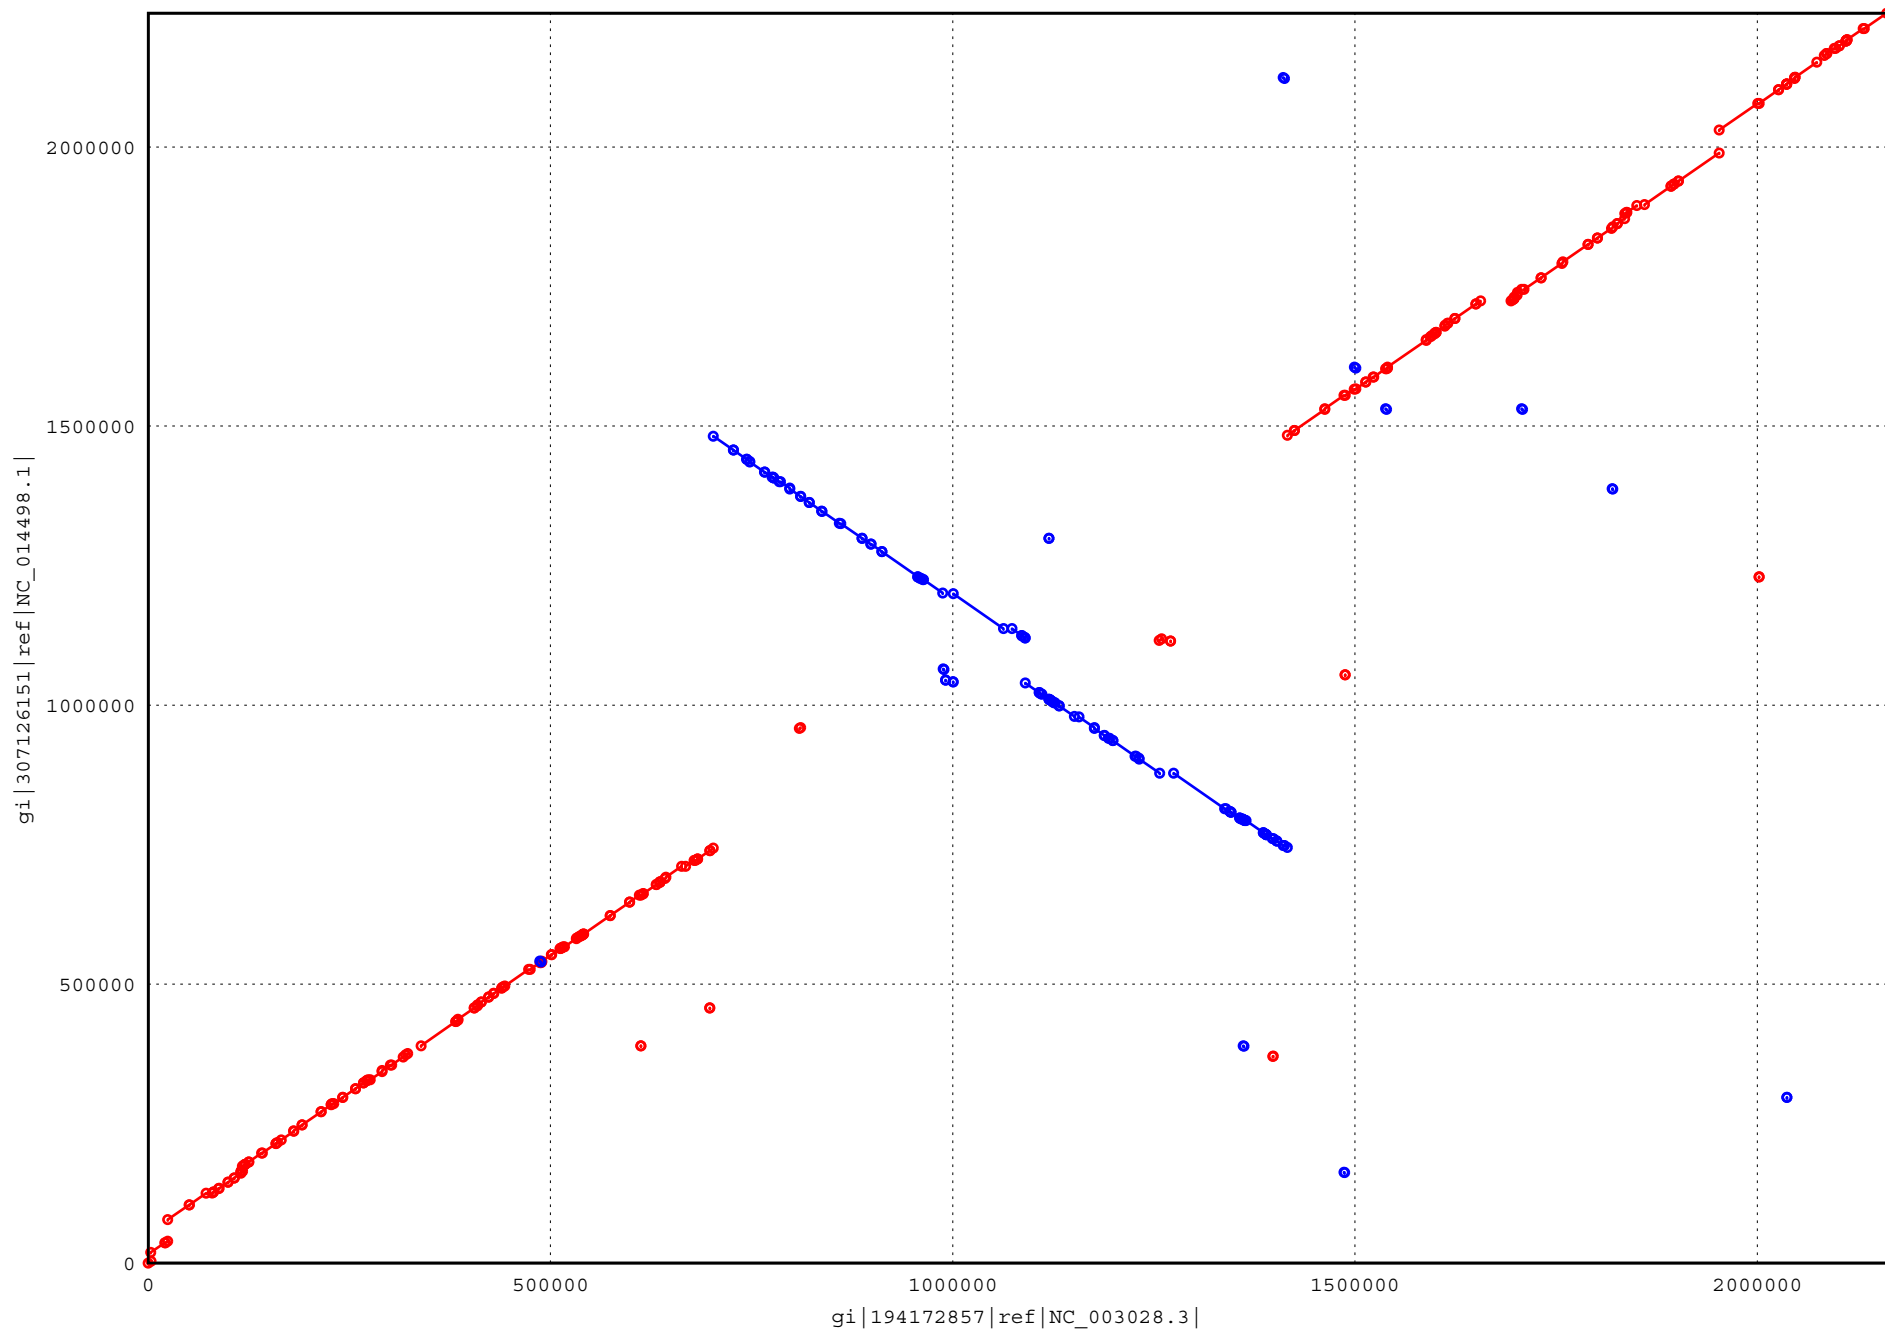

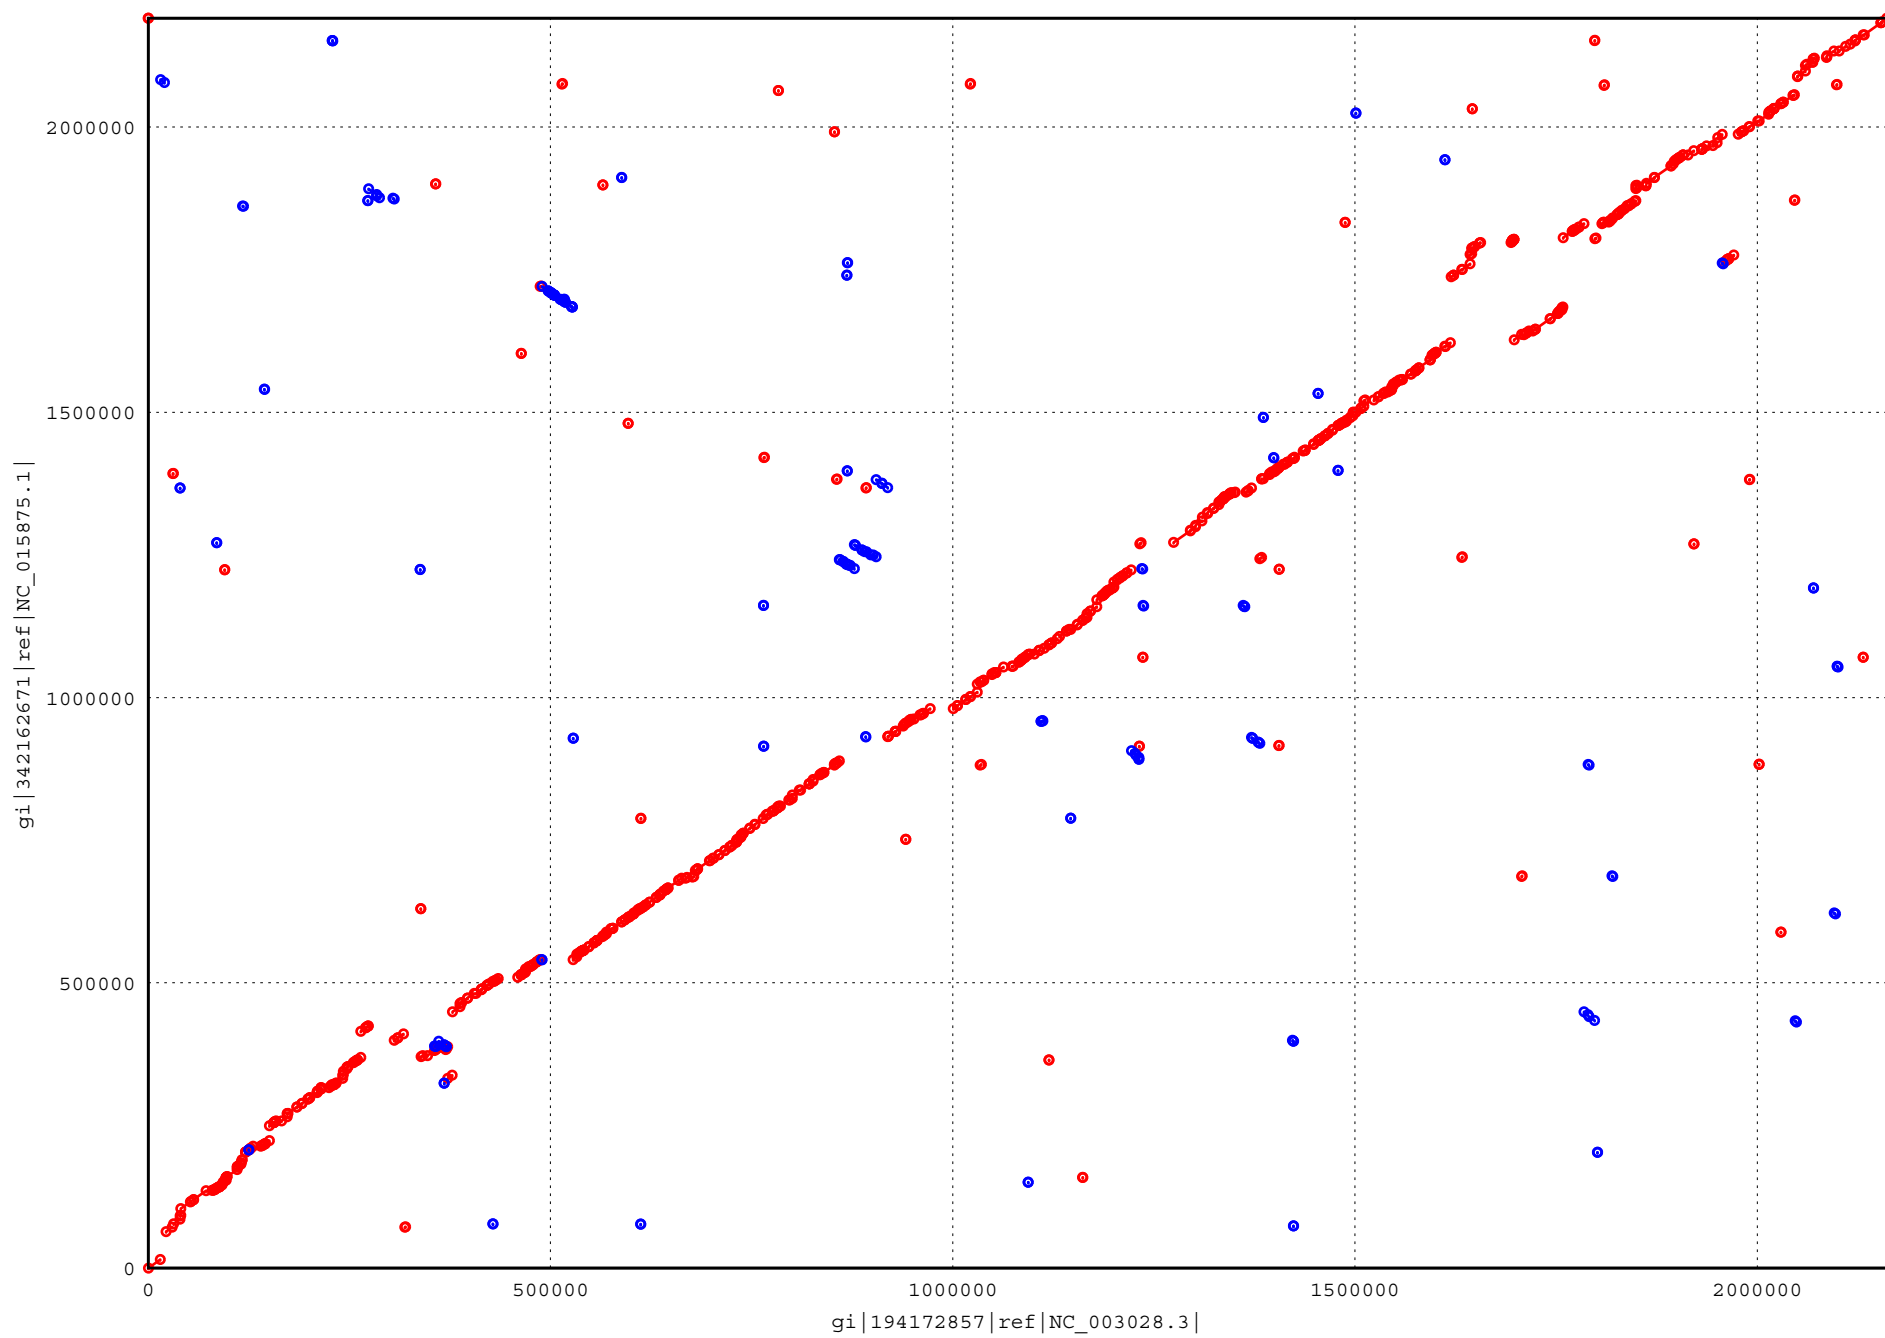

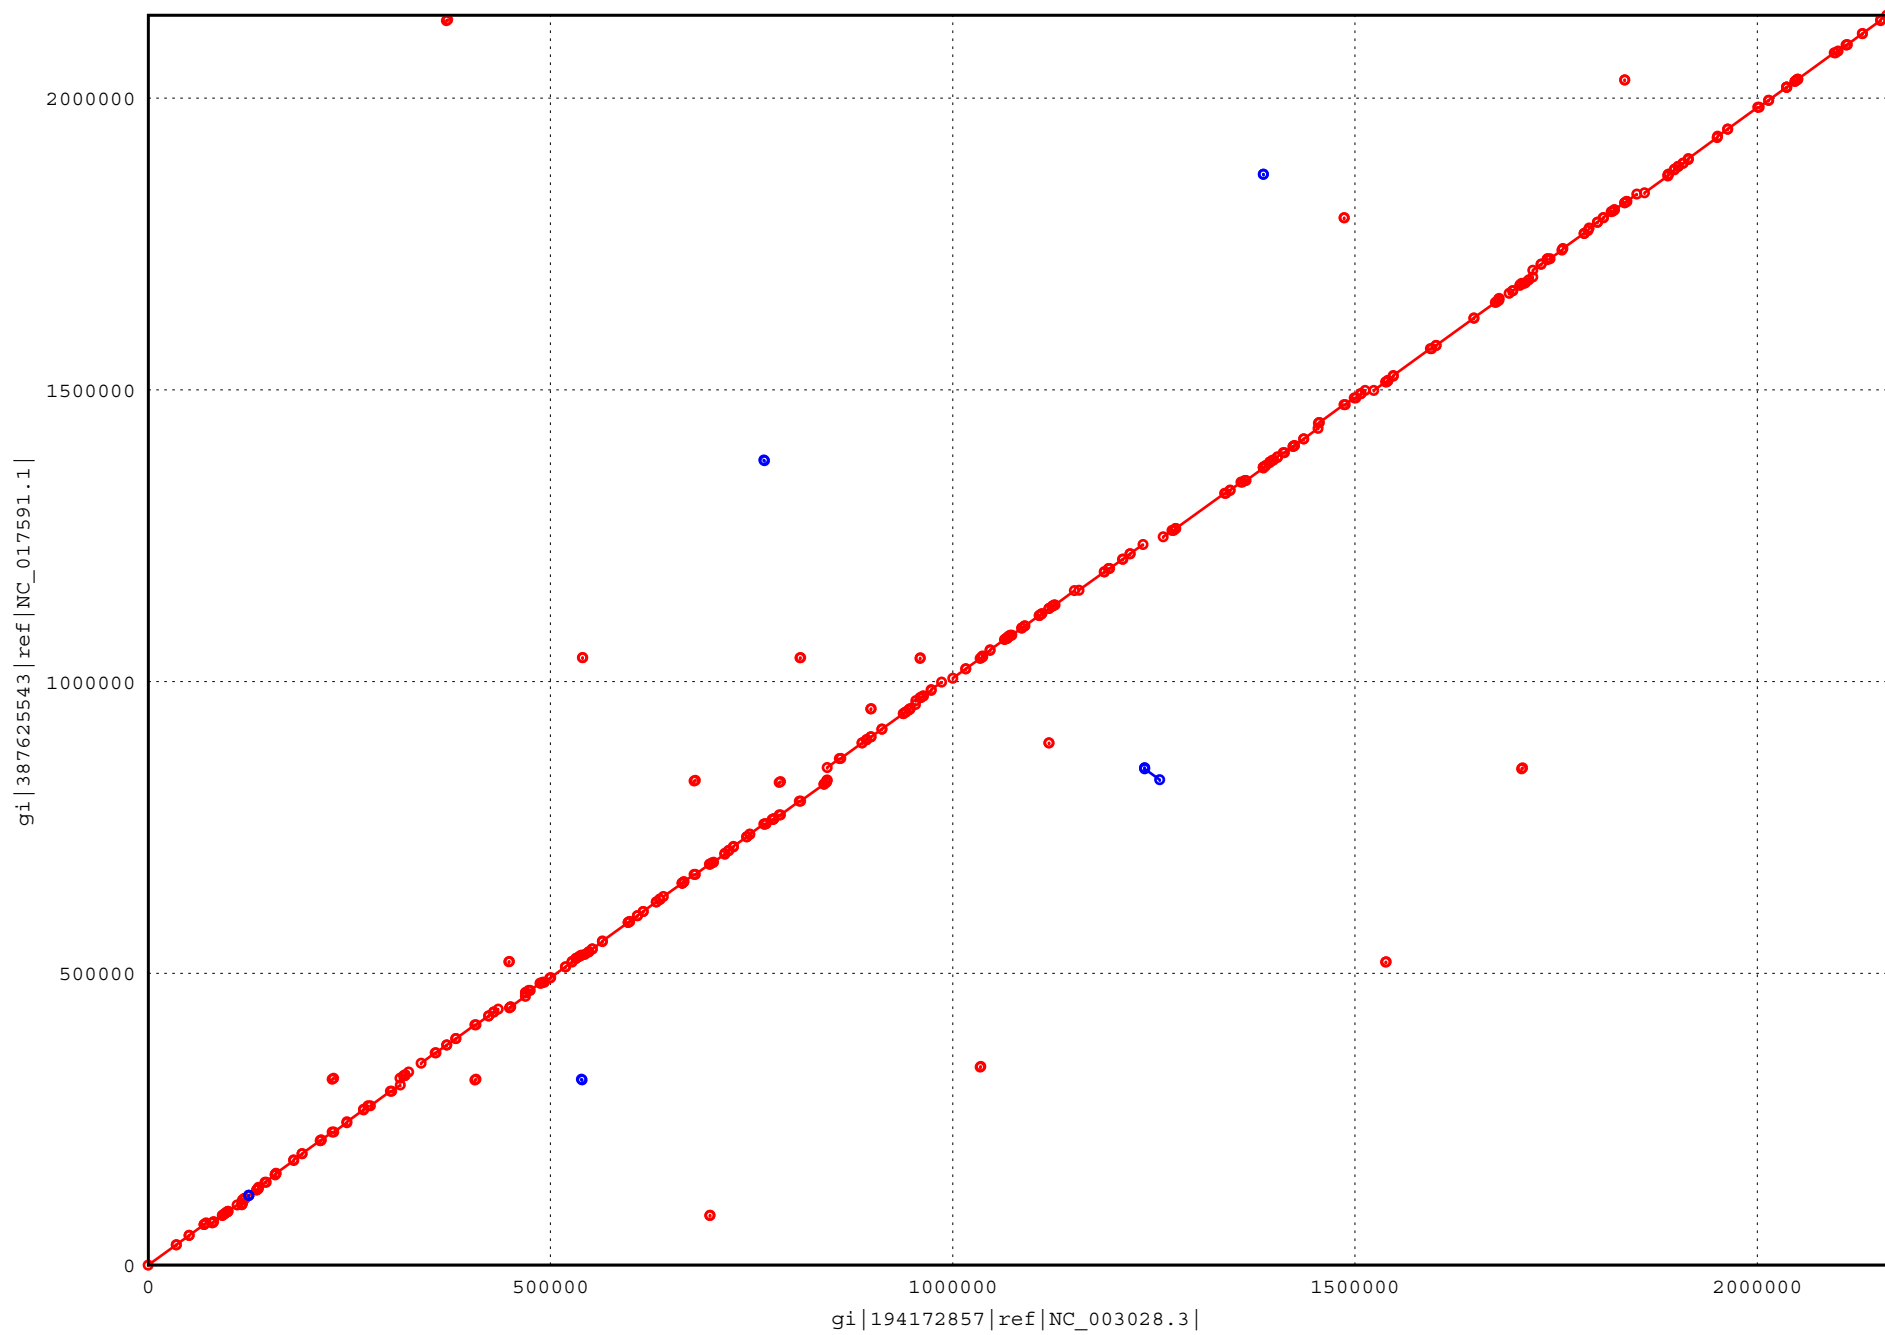

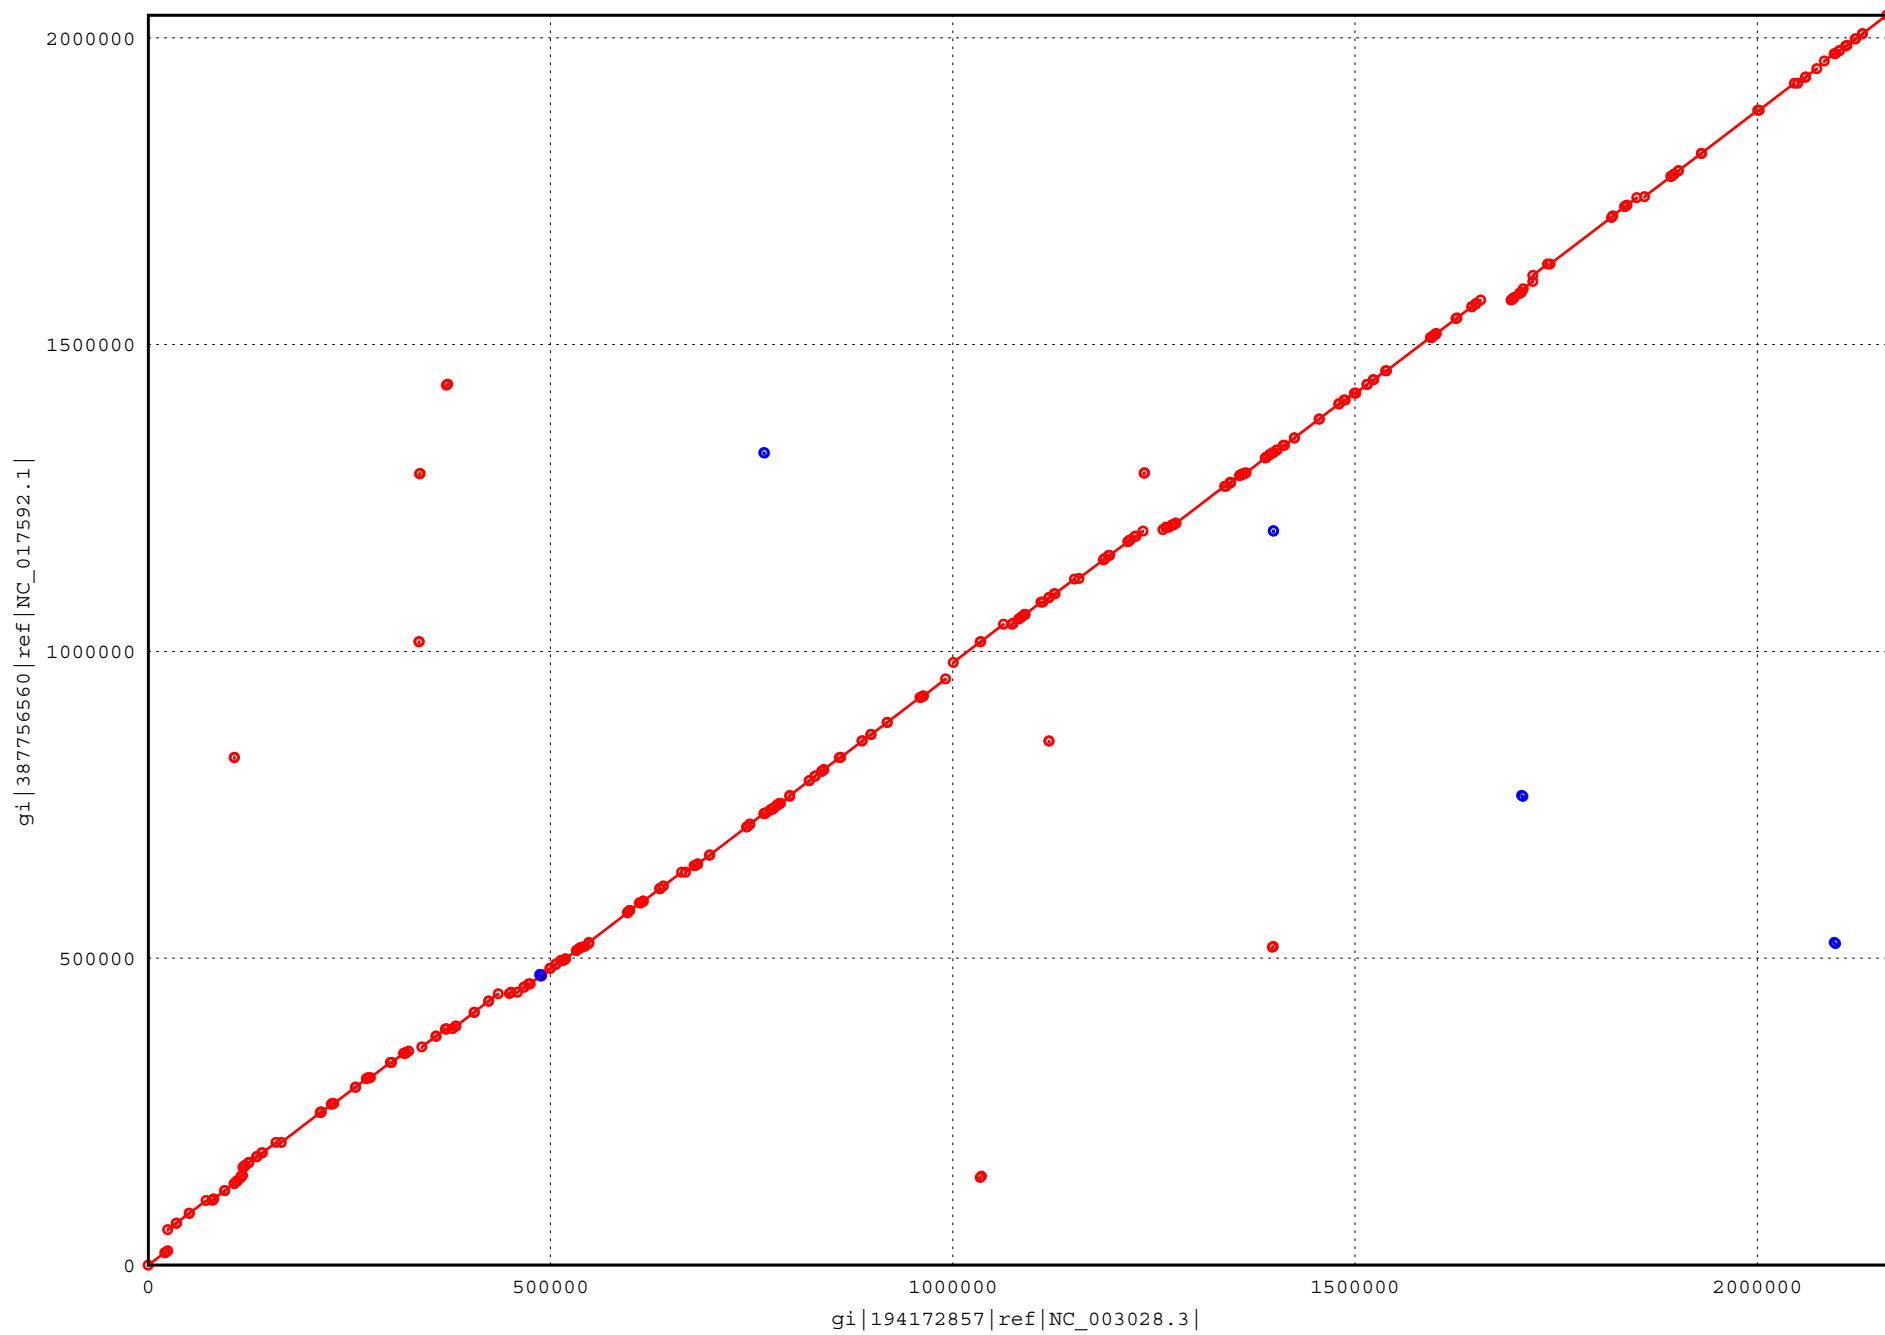



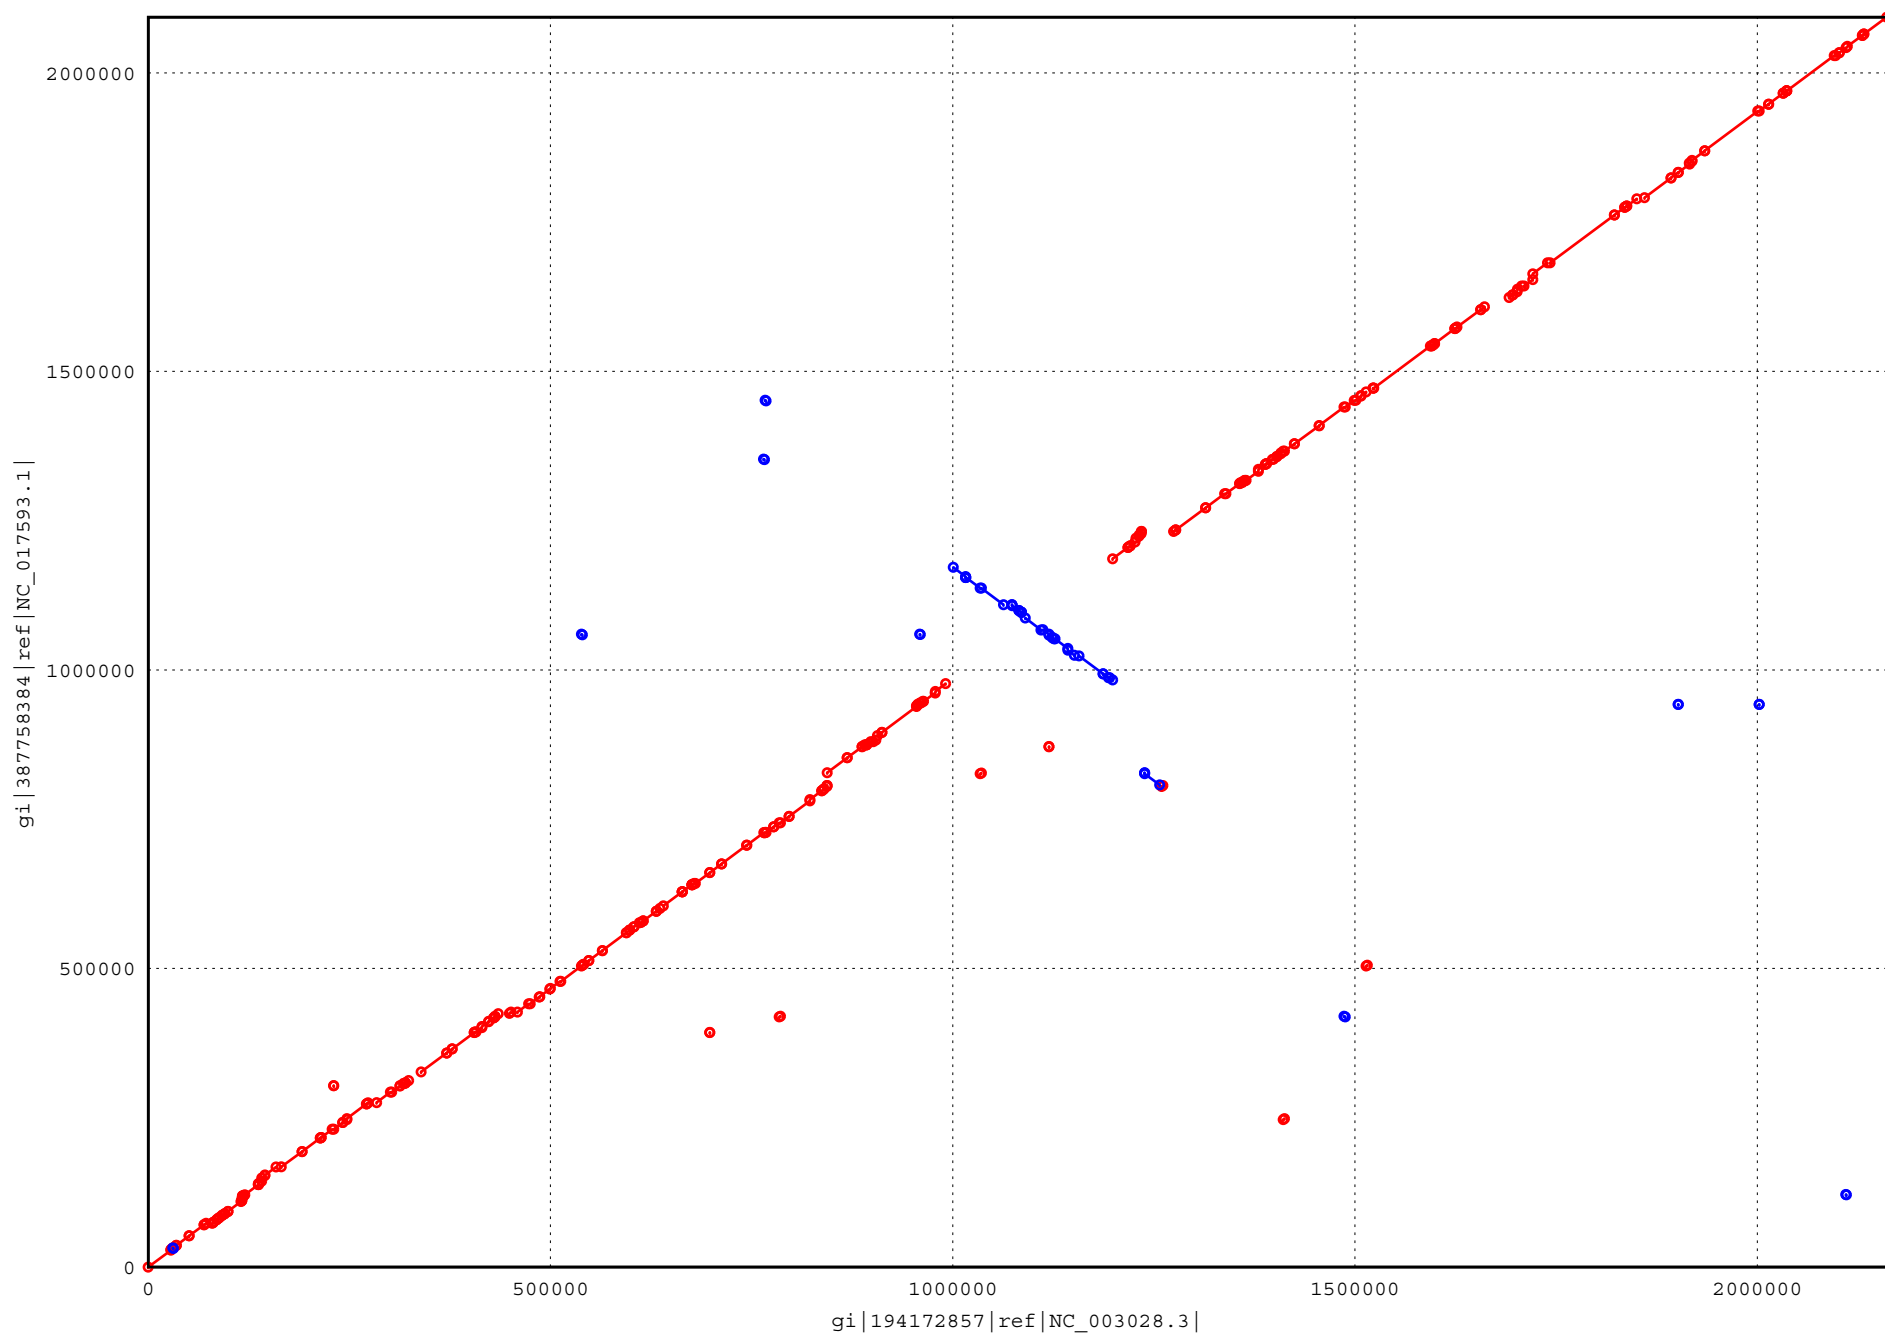

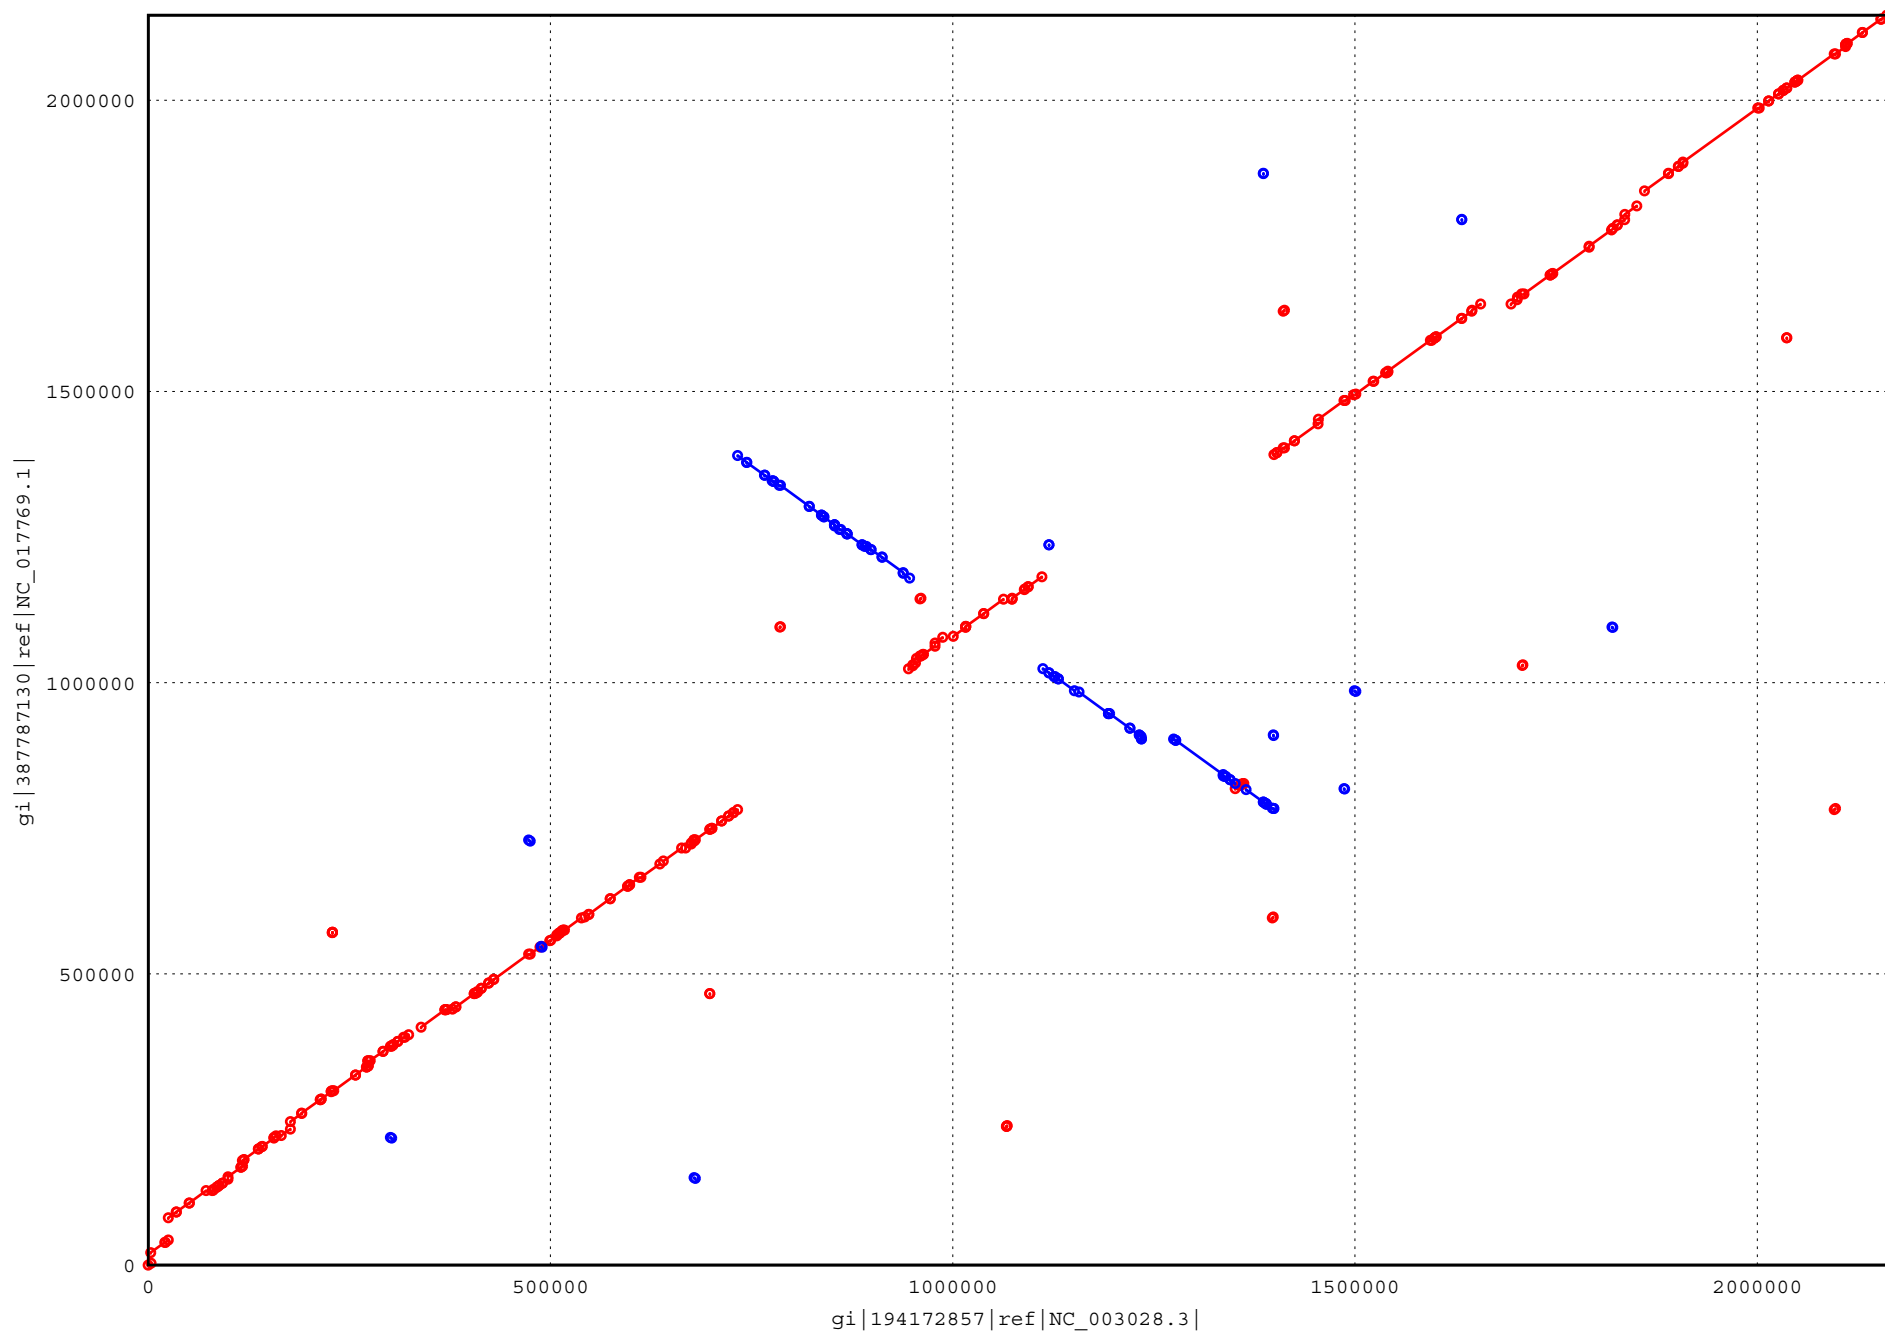

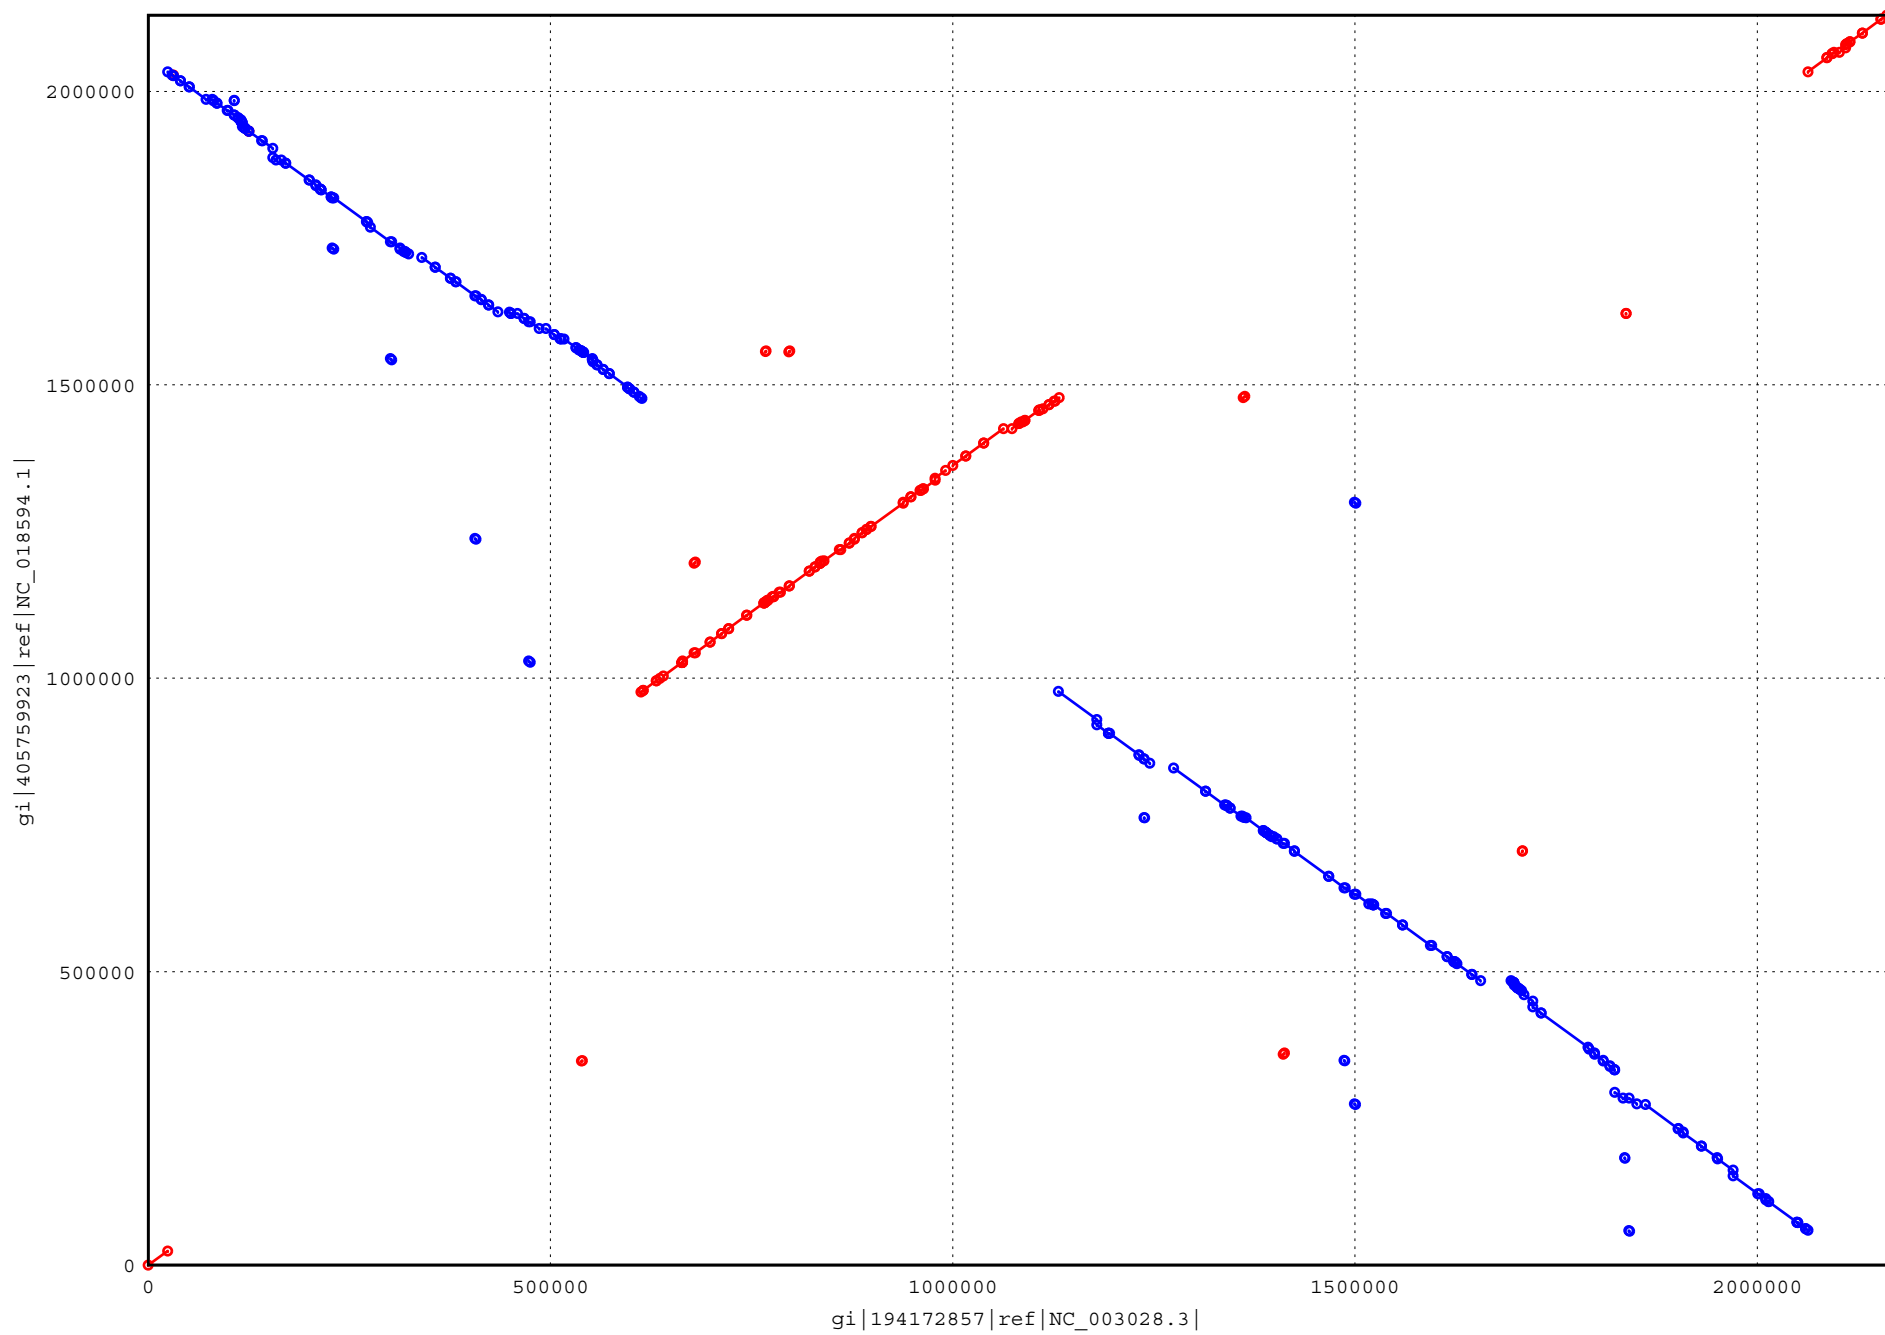

Supplement: c3mb70476a_2.pdf [file c3mb70476a_2.pdf]
